# Supplementary material for: Cytotoxic Minor Piericidin Derivatives from the Actinomycete Strain Streptomyces psammoticus SCSIO NS126
Source: MDPI journal article supplement (doi:10.3390/md19080428), 2021-07-28
Supplement: s1 [file s1]

# Supporting information

## Cytotoxic minor piericidin derivatives from the actinomycete strain *Streptomyces psammoticus* SCSIO NS126

Kunlong Li <sup>a,b,f</sup>, Ziqi Su <sup>c</sup>, Yongli Gao <sup>b,d</sup>, Xiuping Lin <sup>a</sup>, Xiaoyan Pang <sup>a</sup>, Bin Yang <sup>a,b</sup>, Huaming Tao <sup>c</sup>,  
Xiaowei Luo <sup>e,\*</sup>, Yonghong Liu <sup>a,b,e,f,\*</sup>, Xuefeng Zhou <sup>a,b,\*</sup>

<sup>a</sup> CAS Key Laboratory of Tropical Marine Bio-resources and Ecology, Guangdong Key Laboratory of Marine Materia Medica, South China Sea Institute of Oceanology, Chinese Academy of Sciences, Guangzhou, 510301, China; likunlong16@mails.ucas.ac.cn (K.L.); xiupinglin@hotmail.com (X.L.); xypang@scsio.ac.cn (X.P.); yangbin@scsio.ac.cn (B.Y.)

<sup>b</sup> Southern Marine Science and Engineering Guangdong Laboratory (Guangzhou), Guangzhou, 511458, China; yongligao@scsio.ac.cn (Y.G.)

<sup>c</sup> School of Traditional Chinese Medicine, Southern Medical University, Guangzhou 510515, China; ziqisl@163.com (Z.S.); taohm@smu.edu.cn (H.T.)

<sup>d</sup> Institutional Center for Shared Technologies and Facilities, South China Sea Institute of Oceanology, Chinese Academy of Sciences, Guangzhou, 510301, China

<sup>e</sup> Institute of Marine Drugs, Guangxi University of Chinese Medicine, Nanning 530200, China

<sup>f</sup> College of Earth and Planetary Sciences, University of Chinese Academy of Sciences, Beijing, 100049, China

\*Correspondence: xfzhou@scsio.ac.cn (X.Z.); yonghongliu@scsio.ac.cn (Y.L.); luoxiaowei1991@126.com (X.L.); Tel: +86-020-89023174 (X.Z.)

## List of Supporting Information

**Table S1.** Energies of **3a** at MMFF94 force field

**Table S2.** Energies of **3a** at B3LYP/6–31+g(d) level in methanol.

**Figure S1.** The optimized conformers and equilibrium populations of **3a**

**Table S3.** Energies of **4a/4b** at MMFF94 force field

**Table S4.** Energies of **4a/4b** at B3LYP/6–31+g(d) level in methanol.

**Figure S2.** The optimized conformers and equilibrium populations of **4a/4b**

**Table S5.** Energies of **7a/7b** at MMFF94 force field

**Table S6.** Energies of **7a/7b** at B3LYP/6–31+g(d) level in methanol.

**Figure S3.** The optimized conformers and equilibrium populations of **7a/7b**

**Table S7.** <sup>1</sup>H NMR Data of **3A** and **3B** (CD<sub>3</sub>OD, 700MHz)

**Figure S4.** <sup>1</sup>H NMR spectrum of piericidin L (**1**) (CD<sub>3</sub>OD, 700MHz)

**Figure S5.** <sup>13</sup>C NMR spectrum of piericidin L (**1**) (CD<sub>3</sub>OD, 175MHz)

**Figure S6.** <sup>1</sup>H-<sup>1</sup>H COSY spectrum of piericidin L (**1**) (CD<sub>3</sub>OD)

**Figure S7.** HSQC spectrum of piericidin L (**1**) (CD<sub>3</sub>OD)

**Figure S8.** HMBC spectrum of piericidin L (**1**) (CD<sub>3</sub>OD)

**Figure S9.** NOESY spectrum of piericidin L (**1**) (CD<sub>3</sub>OD)

**Figure S10.** UV spectrum of piericidin L (**1**)

**Figure S11.** IR spectrum of piericidin L (**1**)

**Figure S12.** HRESIMS spectrum of piericidin (**1**)

**Figure S13.** <sup>1</sup>H NMR spectrum of piericidin M (**2**) (CD<sub>3</sub>OD, 700MHz)

**Figure S14.** <sup>13</sup>C NMR spectrum of piericidin M (**2**) (CD<sub>3</sub>OD, 175MHz)

**Figure S15.** <sup>1</sup>H-<sup>1</sup>H COSY spectrum of piericidin M (**2**) (CD<sub>3</sub>OD)

**Figure S16.** HSQC spectrum of piericidin M (**2**) (CD<sub>3</sub>OD)

**Figure S17.** HMBC spectrum of piericidin M (**2**) (CD<sub>3</sub>OD)

**Figure S18.** NOESY spectrum of piericidin M (**2**) (CD<sub>3</sub>OD)

**Figure S19.** UV spectrum of piericidin M (**2**)

**Figure S20.** IR spectrum of piericidin M (**2**)

**Figure S21.** HRESIMS spectrum of piericidin M (**2**)

**Figure S22.** <sup>1</sup>H NMR spectrum of piericidin N (**3**) (CD<sub>3</sub>OD, 700MHz)

**Figure S23.** <sup>13</sup>C NMR spectrum of piericidin N (**3**) (CD<sub>3</sub>OD, 175MHz)

**Figure S24.** <sup>1</sup>H-<sup>1</sup>H COSY spectrum of piericidin N (**3**) (CD<sub>3</sub>OD)

**Figure S25.** HSQC spectrum of piericidin N (**3**) (CD<sub>3</sub>OD)

**Figure S26.** HMBC spectrum of piericidin N (**3**) (CD<sub>3</sub>OD)

**Figure S27.** NOESY spectrum of piericidin N (**3**) (CD<sub>3</sub>OD)

**Figure S28.** UV spectrum of piericidin N (**3**)

**Figure S29.** IR spectrum of piericidin N (**3**)

**Figure S30.** HRESIMS spectrum of piericidin N (**3**)

**Figure S31.**  $^1\text{H}$  NMR spectrum of **3A** ( $\text{CD}_3\text{OD}$ , 700MHz)

**Figure S32.**  $^1\text{H}$ - $^1\text{H}$  COSY spectrum of **3A** ( $\text{CD}_3\text{OD}$ )

**Figure S33.**  $^1\text{H}$  NMR spectrum of **3B** ( $\text{CD}_3\text{OD}$ , 700MHz)

**Figure S34.**  $^1\text{H}$ - $^1\text{H}$  COSY spectrum of **3B** ( $\text{CD}_3\text{OD}$ )

**Figure S35.**  $^1\text{H}$  NMR spectrum of piericidin O (**4**) ( $\text{CD}_3\text{OD}$ , 700MHz)

**Figure S36.**  $^{13}\text{C}$  NMR spectrum of piericidin O (**4**) ( $\text{CD}_3\text{OD}$ , 175MHz)

**Figure S37.**  $^1\text{H}$ - $^1\text{H}$  COSY spectrum of piericidin O (**4**) ( $\text{CD}_3\text{OD}$ )

**Figure S38.** HSQC spectrum of piericidin O (**4**) ( $\text{CD}_3\text{OD}$ )

**Figure S39.** HMBC spectrum of piericidin O (**4**) ( $\text{CD}_3\text{OD}$ )

**Figure S40.** NOESY spectrum of piericidin O (**4**) ( $\text{CD}_3\text{OD}$ )

**Figure S41.** UV spectrum of piericidin O (**4**)

**Figure S42.** IR spectrum of piericidin O (**4**)

**Figure S43.** HRESIMS spectrum of piericidin O (**4**)

**Figure S44.**  $^1\text{H}$  NMR spectrum of piericidin P (**5**) ( $\text{CD}_3\text{OD}$ , 700MHz)

**Figure S45.**  $^{13}\text{C}$  NMR spectrum of piericidin P (**5**) ( $\text{CD}_3\text{OD}$ , 175MHz)

**Figure S46.**  $^1\text{H}$ - $^1\text{H}$  COSY spectrum of piericidin P (**5**) ( $\text{CD}_3\text{OD}$ )

**Figure S47.** HSQC spectrum of piericidin P (**5**) ( $\text{CD}_3\text{OD}$ )

**Figure S48.** HMBC spectrum of piericidin P (**5**) ( $\text{CD}_3\text{OD}$ )

**Figure S49.** NOESY spectrum of piericidin P (**5**) ( $\text{CD}_3\text{OD}$ )

**Figure S50.** UV spectrum of piericidin P (**5**)

**Figure S51.** IR spectrum of piericidin P (**5**)

**Figure S52.** HRESIMS spectrum of piericidin (**5**)

**Figure S53.**  $^1\text{H}$  NMR spectrum of piericidin Q (**6**) ( $\text{DMSO}-d_6$ , 700MHz)

**Figure S54.**  $^{13}\text{C}$  NMR spectrum of piericidin Q (**6**) ( $\text{DMSO}-d_6$ , 175MHz)

**Figure S55.**  $^1\text{H}$ - $^1\text{H}$  COSY spectrum of piericidin Q (**6**) ( $\text{DMSO}-d_6$ )

**Figure S56.** HSQC spectrum of piericidin Q (**6**) ( $\text{DMSO}-d_6$ )

**Figure S57.** HMBC spectrum of piericidin Q (**6**) ( $\text{DMSO}-d_6$ )

**Figure S58.** NOESY spectrum of piericidin Q (**6**) ( $\text{DMSO}-d_6$ )

**Figure S59.** UV spectrum of piericidin Q (**6**)

**Figure S60.** IR spectrum of piericidin Q (**6**)

**Figure S61.** HRESIMS spectrum of piericidin Q (**6**)

**Figure S62.**  $^1\text{H}$  NMR spectrum of piericidin R (**7**) ( $\text{CD}_3\text{OD}$ , 700MHz)

**Figure S63.**  $^{13}\text{C}$  NMR spectrum of piericidin R (**7**) ( $\text{CD}_3\text{OD}$ , 175MHz)

**Figure S64.**  $^1\text{H}$ - $^1\text{H}$  COSY spectrum of piericidin R (**7**) ( $\text{CD}_3\text{OD}$ )

**Figure S65.** HSQC spectrum of piericidin R (**7**) ( $\text{CD}_3\text{OD}$ )

**Figure S66.** HMBC spectrum of piericidin R (**7**) ( $\text{CD}_3\text{OD}$ )

**Figure S67.** NOESY spectrum of piericidin R (**7**) ( $\text{CD}_3\text{OD}$ )

**Figure S68.** UV spectrum of piericidin R (**7**)

**Figure S69.** IR spectrum of piericidin R (**7**)

**Figure S70.** HRESIMS spectrum of piericidin R (**7**)

**Figure S71.**  $^1\text{H}$  NMR spectrum of compound **8** ( $\text{CD}_3\text{OD}$ , 700MHz)

**Figure S72.**  $^{13}\text{C}$  NMR spectrum of compound **8** ( $\text{CD}_3\text{OD}$ , 175MHz)

**Figure S73.**  $^1\text{H}$ - $^1\text{H}$  COSY spectrum of compound **8** ( $\text{CD}_3\text{OD}$ )

**Figure S74.** HSQC spectrum of compound **8** ( $\text{CD}_3\text{OD}$ )

**Figure S75.** HMBC spectrum of compound **8** ( $\text{CD}_3\text{OD}$ )

**Figure S76.** NOESY spectrum of compound **8** ( $\text{CD}_3\text{OD}$ )

**Figure S77.** UV spectrum of compound **8**

**Figure S78.** IR spectrum of compound **8**

**Figure S79.** HRESIMS spectrum of compound **8**

**Figure S80.**  $^1\text{H}$  NMR spectrum of compound **9** ( $\text{CD}_3\text{OD}$ , 700MHz)

**Figure S81.** The HPLC results for D-glucose and **8** by acidic hydrolysis

**Figure S82.** The HPLC analysis of crude extract in different external pH

**Figure S83.** The content analysis of PA and GPA in different fermentation time

**Figure S84.** The HPLC analysis of crude extract in different fermentation time

**Table S1.** Energies of **3a** at MMFF94 force field

| Configuration | Conformer | Energy (kcal/mol) | Population (%) |
|---------------|-----------|-------------------|----------------|
| 9R- <b>3a</b> | 1         | 54.06             | 58.6           |
| 9R- <b>3a</b> | 2         | 56.12             | 25.5           |
| 9R- <b>3a</b> | 3         | 58.00             | 11.9           |
| 9R- <b>3a</b> | 4         | 63.10             | 1.5            |
| 9R- <b>3a</b> | 5         | 64.36             | 0.9            |
| 9R- <b>3a</b> | 6         | 66.17             | 0.4            |

**Table S2.** Energies of **3a** at B3LYP/6–31+g(d) level in methanol.

| Configuration | Conformer | E (Hartree)   | E (kcal/mol)       | Population (%) |
|---------------|-----------|---------------|--------------------|----------------|
| 9R- <b>3a</b> | 1         | – 506.5650469 | – 317874.632580219 | 63.6           |
| 9R- <b>3a</b> | 2         | – 506.5626421 | – 317873.123544171 | 4.97           |
| 9R- <b>3a</b> | 3         | – 506.5637643 | – 317873.827735893 | 16.33          |
| 9R- <b>3a</b> | 4         | – 506.5633788 | – 317873.585830788 | 10.85          |
| 9R- <b>3a</b> | 5         | – 506.5624711 | – 317873.016239961 | 4.15           |
| 9R- <b>3a</b> | 6         | – 506.5590446 | – 317870.866076946 | 0.11           |

9R-**3a**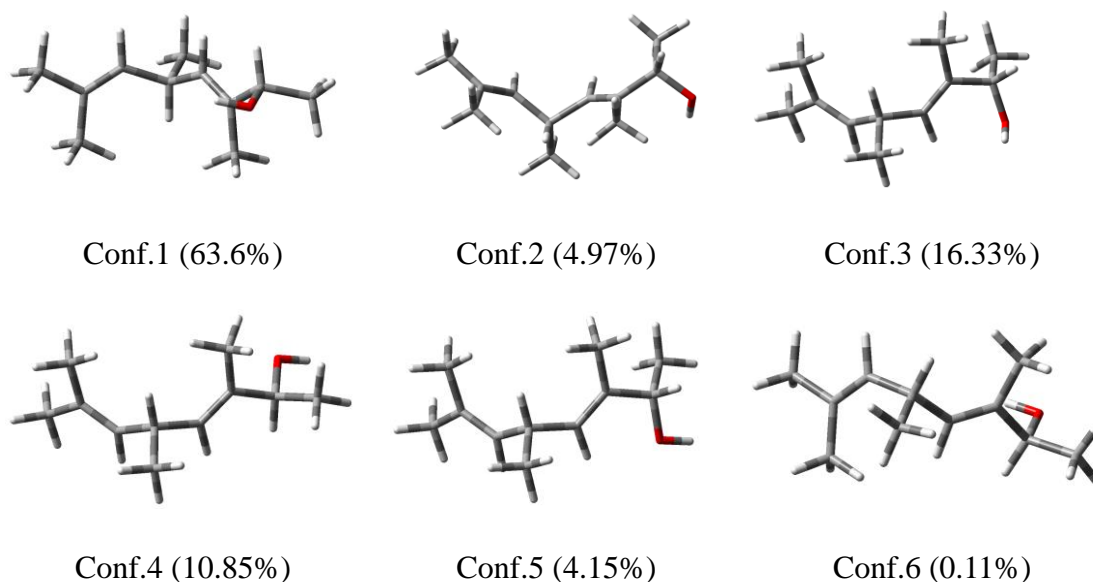**Figure S1.** The optimized conformers and equilibrium populations of **3a**

**Table S3.** Energies of **4a/4b** at MMFF94 force field

| Configuration      | Conformer | Energy (kcal/mol) | Population (%) |
|--------------------|-----------|-------------------|----------------|
| 9S, 12S- <b>4a</b> | 1         | 81.27             | 30.2           |
| 9S, 12S- <b>4a</b> | 2         | 81.96             | 22.9           |
| 9S, 12S- <b>4a</b> | 3         | 84.37             | 8.7            |
| 9S, 12S- <b>4a</b> | 4         | 85.63             | 5.2            |
| 9S, 12S- <b>4a</b> | 5         | 85.63             | 5.2            |
| 9S, 12S- <b>4a</b> | 6         | 85.93             | 4.6            |
| 9S, 12S- <b>4a</b> | 7         | 86.70             | 3.4            |
| 9S, 12S- <b>4a</b> | 8         | 86.70             | 3.4            |
| 9S, 12S- <b>4a</b> | 9         | 87.74             | 2.2            |
| 9S, 12S- <b>4a</b> | 10        | 87.86             | 2.1            |
| 9S, 12R- <b>4b</b> | 1         | 81.59             | 26.8           |
| 9S, 12R- <b>4b</b> | 2         | 81.73             | 25.4           |
| 9S, 12R- <b>4b</b> | 3         | 84.69             | 7.7            |
| 9S, 12R- <b>4b</b> | 4         | 84.74             | 7.5            |
| 9S, 12R- <b>4b</b> | 5         | 85.22             | 6.2            |
| 9S, 12R- <b>4b</b> | 6         | 85.97             | 4.6            |
| 9S, 12R- <b>4b</b> | 7         | 86.59             | 3.6            |
| 9S, 12R- <b>4b</b> | 8         | 86.70             | 3.4            |
| 9S, 12R- <b>4b</b> | 9         | 87.56             | 2.4            |
| 9S, 12R- <b>4b</b> | 10        | 88.76             | 1.5            |

**Table S4.** Energies of **4a/4b** at B3LYP/6–31+g(d) level in methanol.

| Configuration      | Conformer | E (Hartree)   | E (kcal/mol)      | Population |
|--------------------|-----------|---------------|-------------------|------------|
| 9S, 12S- <b>4a</b> | 1         | –506.5485087  | –317864.254694337 | 47.85      |
| 9S, 12S- <b>4a</b> | 2         | – 506.5475945 | –317863.681024695 | 18.15      |
| 9S, 12S- <b>4a</b> | 3         | –506.5475112  | –317863.628753112 | 16.62      |
| 9S, 12S- <b>4a</b> | 4         | –506.5460802  | –317862.730786302 | 3.65       |
| 9S, 12S- <b>4a</b> | 5         | –506.5455304  | –317862.385781304 | 2.04       |
| 9S, 12S- <b>4a</b> | 6         | –506.5451027  | –317862.117395277 | 1.29       |
| 9S, 12S- <b>4a</b> | 7         | –506.5464565  | –317862.966918315 | 5.43       |
| 9S, 12S- <b>4a</b> | 8         | –506.5451652  | –317862.156614652 | 1.38       |
| 9S, 12S- <b>4a</b> | 9         | –506.5455823  | –317862.418349073 | 2.15       |

|                                      |    |              |                   |       |
|--------------------------------------|----|--------------|-------------------|-------|
| 9 <i>S</i> , 12 <i>S</i> - <b>4a</b> | 10 | -506.5451999 | -317862.178389249 | 1.43  |
| 9 <i>S</i> , 12 <i>R</i> - <b>4b</b> | 1  | -506.5484928 | -317864.244716928 | 48.28 |
| 9 <i>S</i> , 12 <i>R</i> - <b>4b</b> | 2  | -506.5475185 | -317863.633333935 | 17.19 |
| 9 <i>S</i> , 12 <i>R</i> - <b>4b</b> | 3  | -506.5475294 | -317863.640173794 | 17.39 |
| 9 <i>S</i> , 12 <i>R</i> - <b>4b</b> | 4  | -506.5461035 | -317862.745407285 | 3.84  |
| 9 <i>S</i> , 12 <i>R</i> - <b>4b</b> | 5  | -506.5464623 | -317862.970557873 | 5.61  |
| 9 <i>S</i> , 12 <i>R</i> - <b>4b</b> | 6  | -506.5454718 | -317862.349009218 | 1.96  |
| 9 <i>S</i> , 12 <i>R</i> - <b>4b</b> | 7  | -506.545141  | -317862.14142891  | 1.38  |
| 9 <i>S</i> , 12 <i>R</i> - <b>4b</b> | 8  | -506.5450981 | -317862.114508731 | 1.32  |
| 9 <i>S</i> , 12 <i>R</i> - <b>4b</b> | 9  | -506.5456025 | -317862.431024775 | 2.25  |
| 9 <i>S</i> , 12 <i>R</i> - <b>4b</b> | 10 | -506.5445943 | -317861.798369193 | 0.77  |

9*S*, 12*S*-**4a**

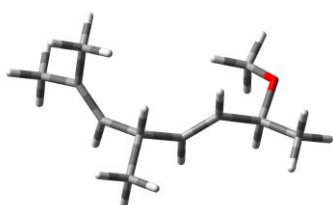

Conf.1 (47.85%)

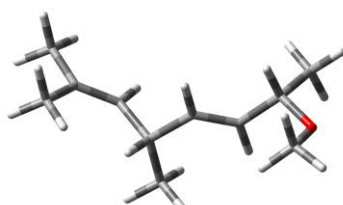

Conf.2 (18.15%)

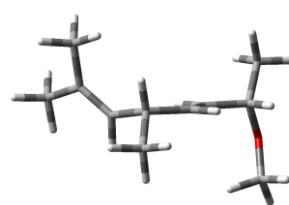

Conf.3 (16.62%)

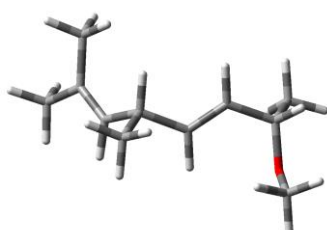

Conf.4 (3.65%)

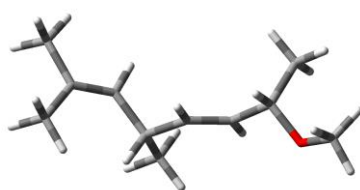

Conf.5 (2.04%)

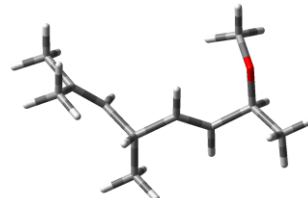

Conf.6 (1.29%)

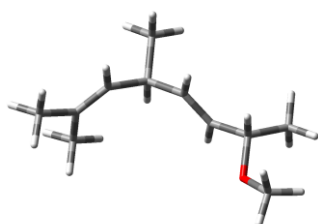

Conf.7 (5.43%)

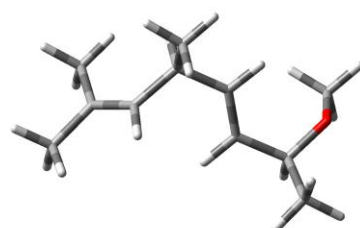

Conf.8 (1.38%)

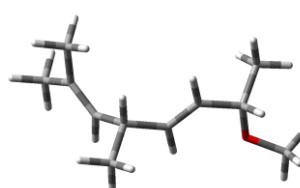

Conf.9 (2.15%)

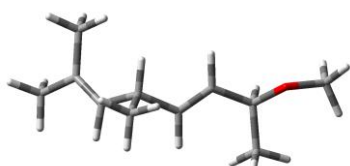

Conf.10 (1.43%)  
9*S*, 12*R*-**4b**

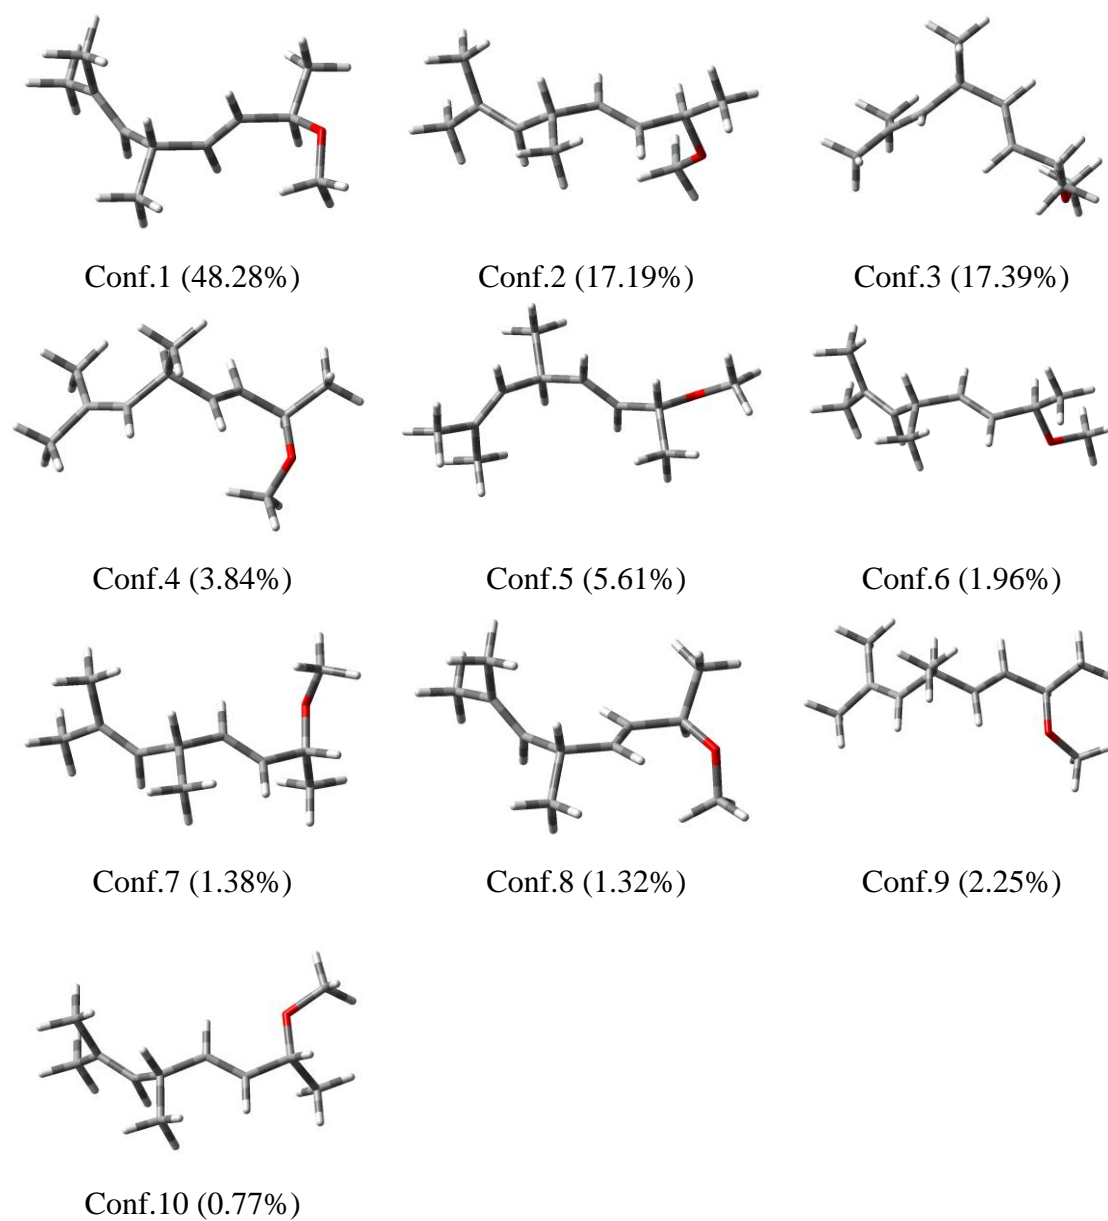

**Figure S2.** The optimized conformers and equilibrium populations of **4a/4b**

**Table S5.** Energies of **7a/7b** at MMFF94 force field

| Configuration           | Conformer | Energy (kcal/mol) | Population (%) |
|-------------------------|-----------|-------------------|----------------|
| 10 <i>R</i> - <b>7a</b> | 1         | 111.43            | 33.8           |
| 10 <i>R</i> - <b>7a</b> | 2         | 113.24            | 16.3           |
| 10 <i>R</i> - <b>7a</b> | 3         | 114.86            | 8.5            |



|        |    |        |      |
|--------|----|--------|------|
| 10R-7a | 4  | 115.22 | 7.3  |
| 10R-7a | 5  | 115.33 | 7.0  |
| 10R-7a | 6  | 115.44 | 6.7  |
| 10R-7a | 7  | 116.71 | 4.0  |
| 10R-7a | 8  | 117.00 | 3.6  |
| 10R-7a | 9  | 117.46 | 3.0  |
| 10R-7a | 10 | 118.33 | 2.1  |
| 10S-7b | 1  | 111.43 | 30.7 |
| 10S-7b | 2  | 113.24 | 14.8 |
| 10S-7b | 3  | 114.41 | 9.3  |
| 10S-7b | 4  | 114.86 | 7.7  |
| 10S-7b | 5  | 115.22 | 6.7  |
| 10S-7b | 6  | 115.33 | 6.4  |
| 10S-7b | 7  | 115.44 | 6.1  |
| 10S-7b | 8  | 116.71 | 3.7  |
| 10S-7b | 9  | 117.00 | 3.3  |
| 10S-7b | 10 | 117.46 | 2.7  |

**Table S6.** Energies of **7a/7b** at B3LYP/6–31+g(d) level in methanol.

| Configuration | Conformer | E (Hartree)   | E (kcal/mol)      | Population |
|---------------|-----------|---------------|-------------------|------------|
| 10R-7a        | 1         | – 467.2404965 | –293198.083958715 | 13.79      |
| 10R-7a        | 2         | – 467.2412531 | –293198.558732781 | 30.76      |
| 10R-7a        | 3         | – 467.2395649 | –293197.499370399 | 5.14       |
| 10R-7a        | 4         | –467.2391298  | –293197.226340798 | 3.24       |
| 10R-7a        | 5         | –467.2392257  | –293197.286519007 | 3.59       |
| 10R-7a        | 6         | –467.2406097  | –293198.154992847 | 15.55      |
| 10R-7a        | 7         | –467.2382961  | –293196.703185711 | 1.34       |
| 10R-7a        | 8         | –467.2403141  | –293197.969500891 | 11.37      |
| 10R-7a        | 9         | –467.2405155  | –293198.095881405 | 14.07      |
| 10R-7a        | 10        | –467.2381497  | –293196.611318247 | 1.15       |
| 10S-7b        | 1         | –467.2404965  | –293198.083958715 | 12.04      |
| 10S-7b        | 2         | –467.2412531  | –293198.558732781 | 26.85      |
| 10S-7b        | 3         | –467.2406188  | –293198.160703188 | 13.71      |
| 10S-7b        | 4         | –467.2395649  | –293197.499370399 | 4.48       |

|        |    |              |                   |       |
|--------|----|--------------|-------------------|-------|
| 10S-7b | 5  | -467.2391298 | -293197.226340798 | 2.83  |
| 10S-7b | 6  | -467.2392257 | -293197.286519007 | 3.13  |
| 10S-7b | 7  | -467.2406097 | -293198.154992847 | 13.58 |
| 10S-7b | 8  | -467.238296  | -293196.70312296  | 1.17  |
| 10S-7b | 9  | -467.2403141 | -293197.969500891 | 9.92  |
| 10S-7b | 10 | -467.2405155 | -293198.095881405 | 12.29 |

### 10R-7a

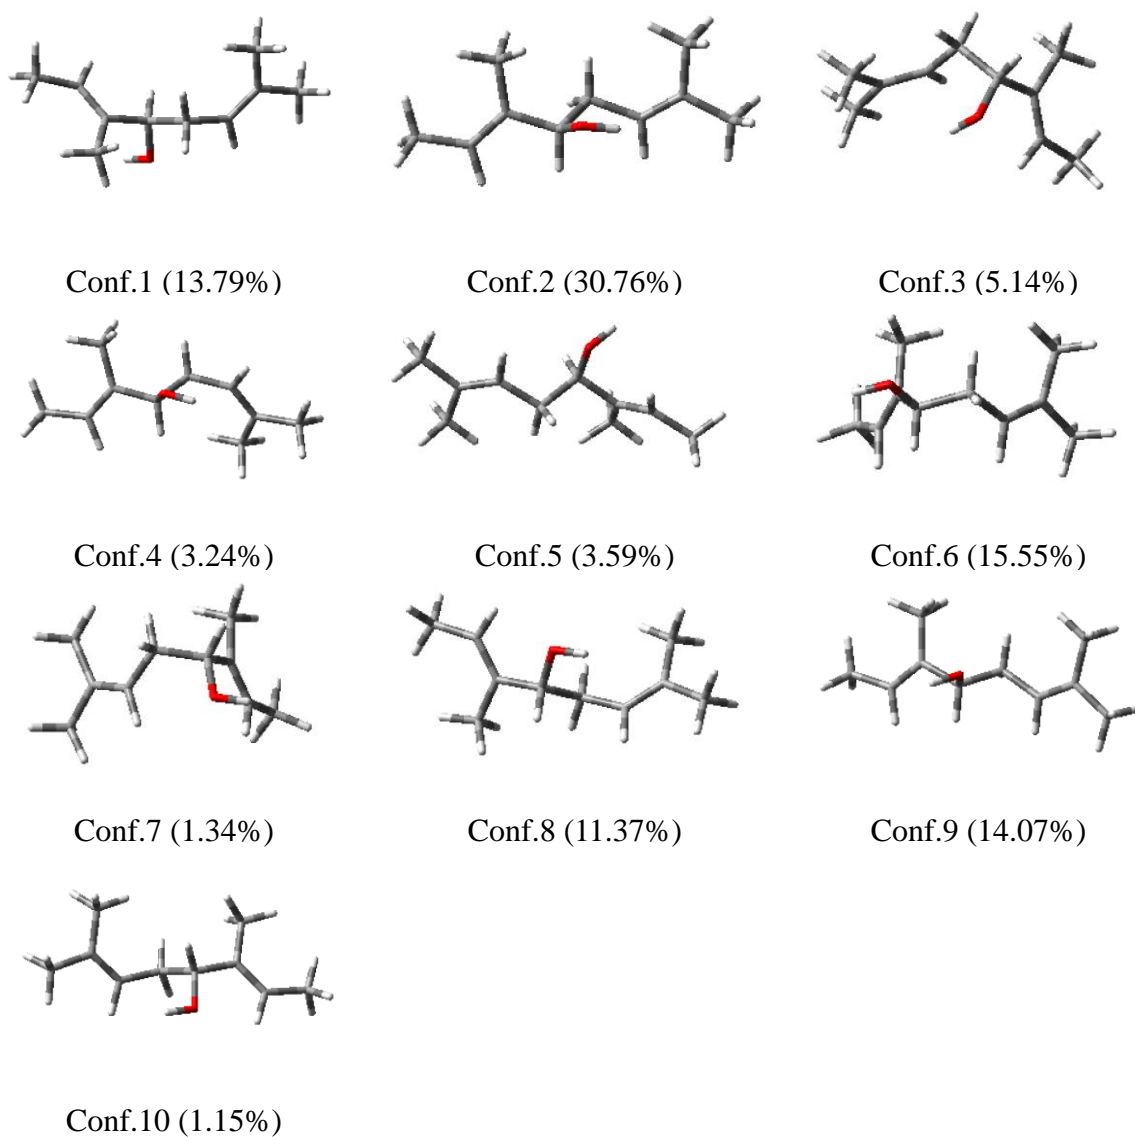

### 10S-7b

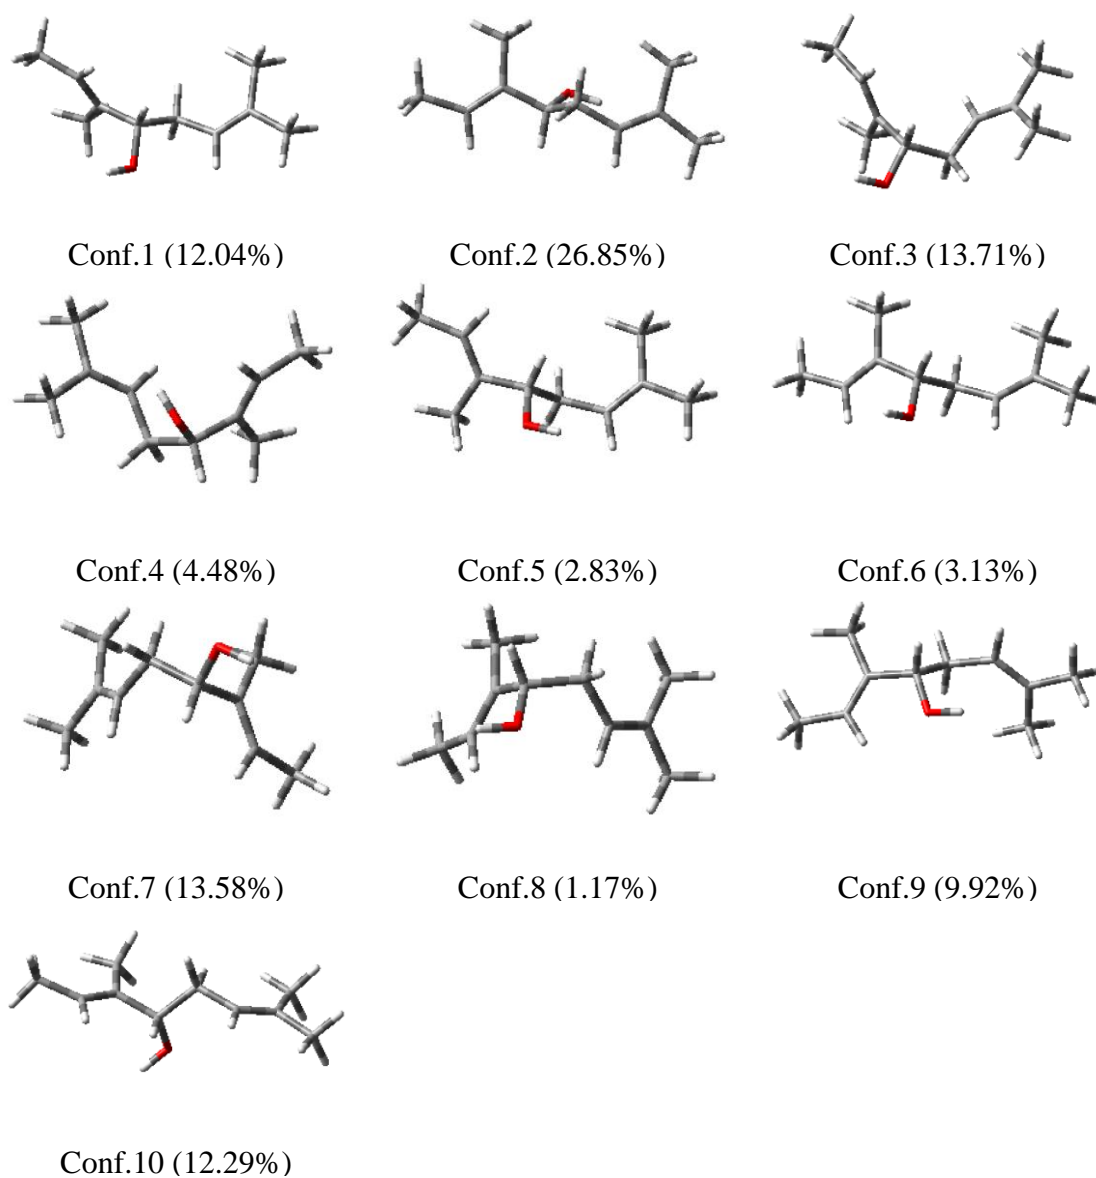

**Figure S3.** The optimized conformers and equilibrium populations of **7a/7b**.

**Table S7.**  $^1\text{H}$  NMR Data of **3A** and **3B** ( $\text{CD}_3\text{OD}$ , 700MHz)

| Pos. | <b>3A</b> | <b>3B</b> | $\Delta\delta_{S-R}$ |
|------|-----------|-----------|----------------------|
| 8    | 5.19      | 5.17      | +0.02                |
| 9    | 3.44      | 3.43      | +0.01                |
| 10   | 5.45      | 5.37      | +0.08                |
| 13   | 1.32      | 1.39      | -0.07                |
| 14   | 1.67      | 1.47      | +0.20                |
| 15   | 1.02      | 0.98      | +0.04                |

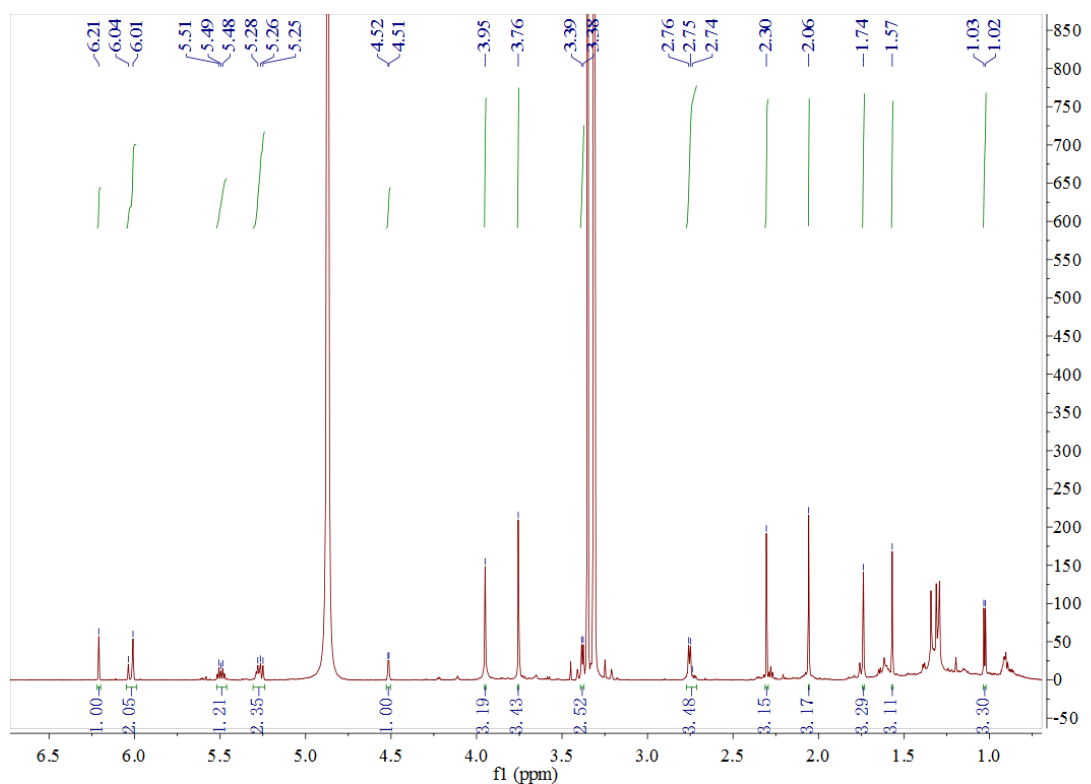

**Figure S4.**  $^1\text{H}$  NMR spectrum of piericidin L (**1**) ( $\text{CD}_3\text{OD}$ , 700MHz)

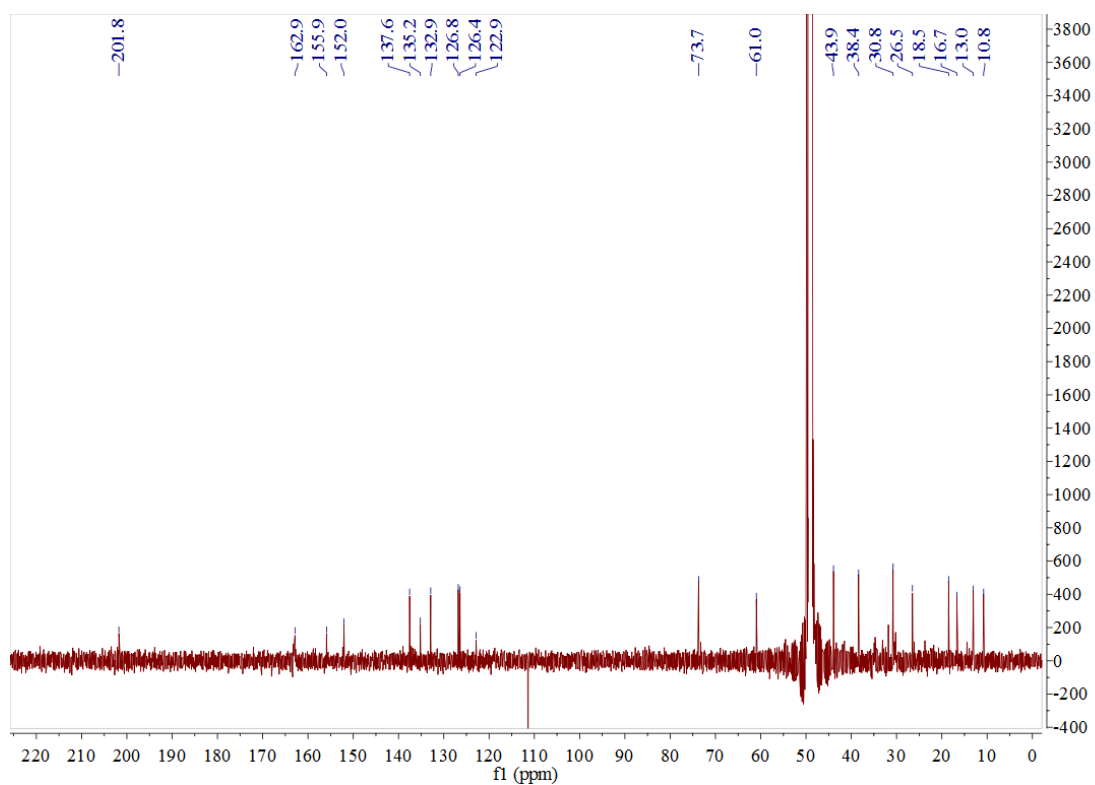

**Figure S5.**  $^{13}\text{C}$  NMR spectrum of piericidin L (**1**) ( $\text{CD}_3\text{OD}$ , 175MHz)

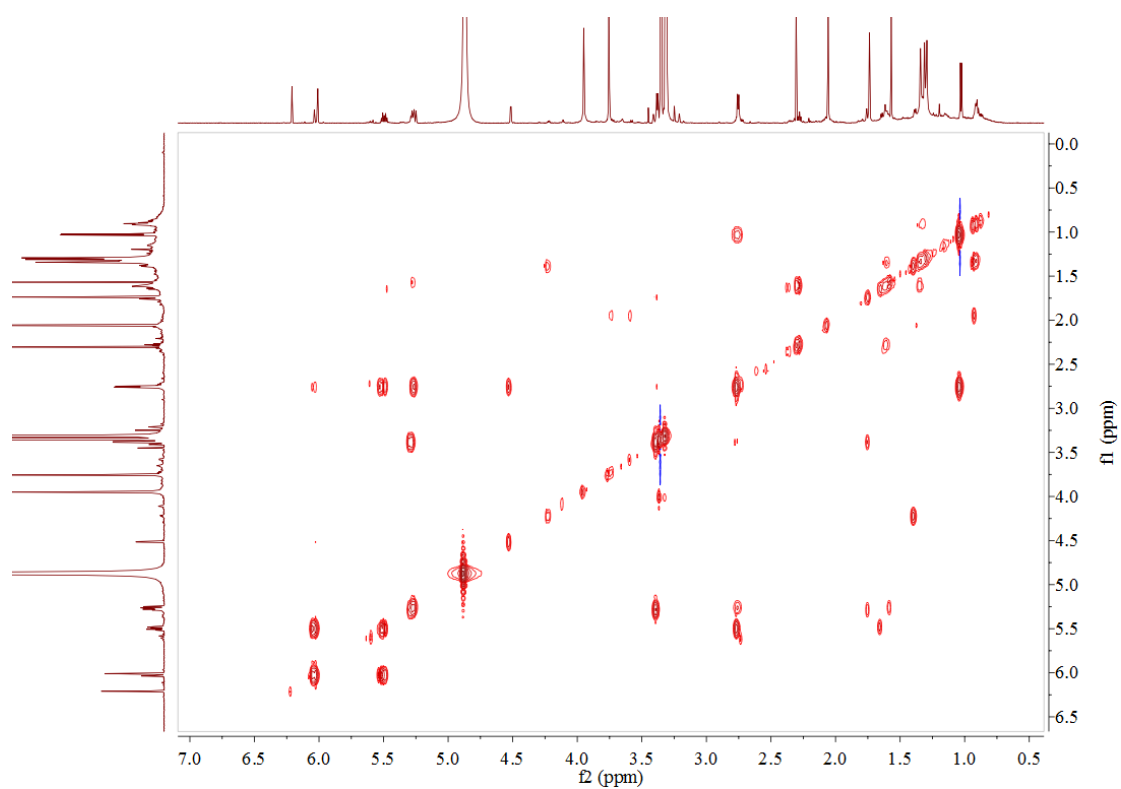

**Figure S6.**  $^1\text{H}$ - $^1\text{H}$  COSY spectrum of piericidin L (**1**) ( $\text{CD}_3\text{OD}$ )

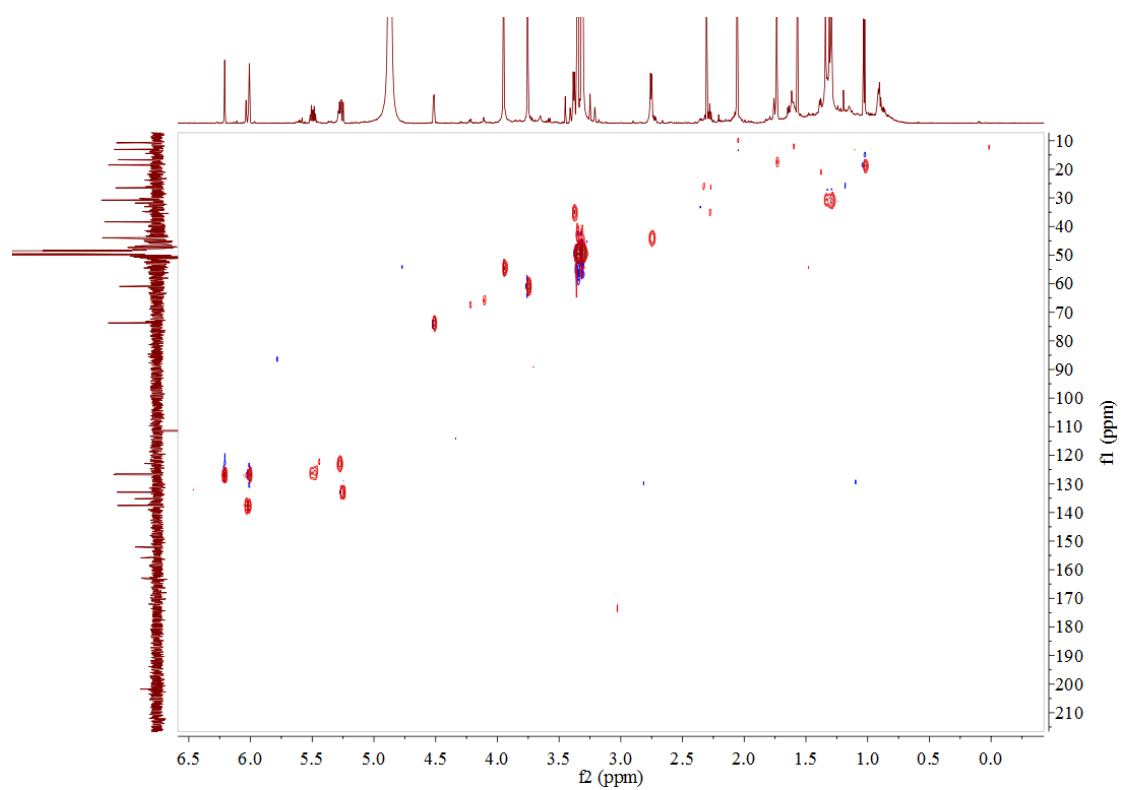

**Figure S7.** HSQC spectrum of piericidin L (**1**) ( $\text{CD}_3\text{OD}$ )

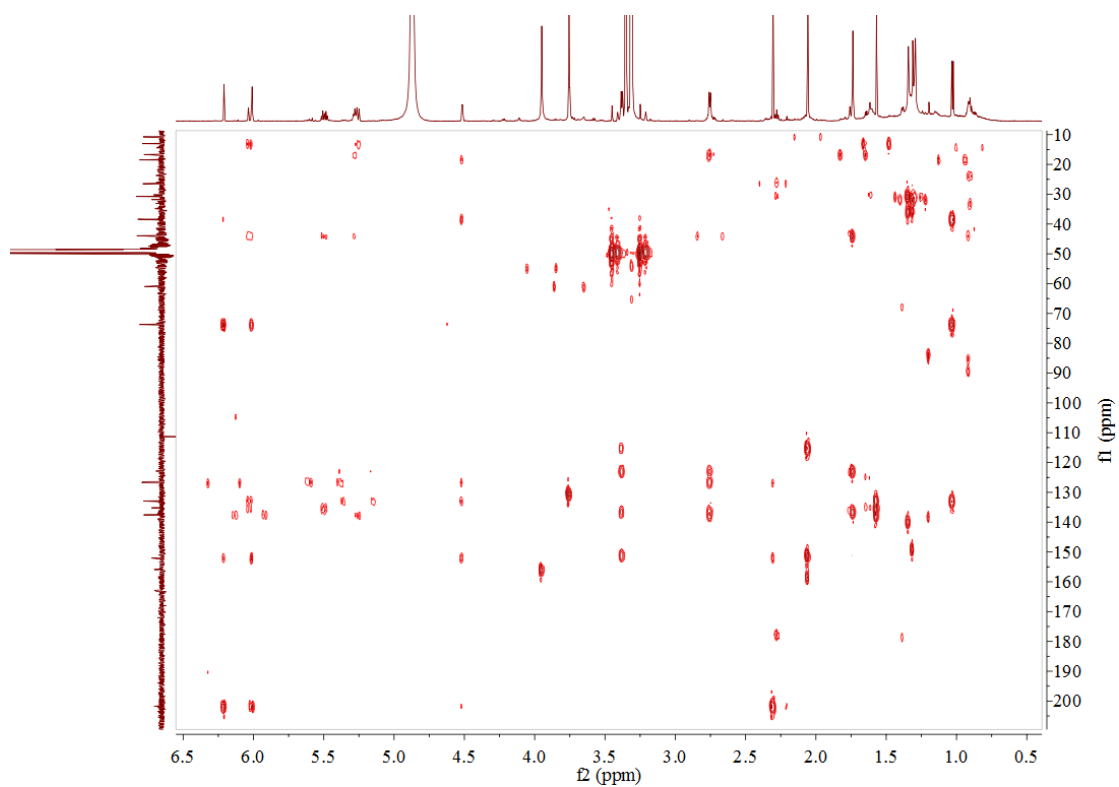

**Figure S8.** HMBC spectrum of piericidin L (**1**) (CD<sub>3</sub>OD)

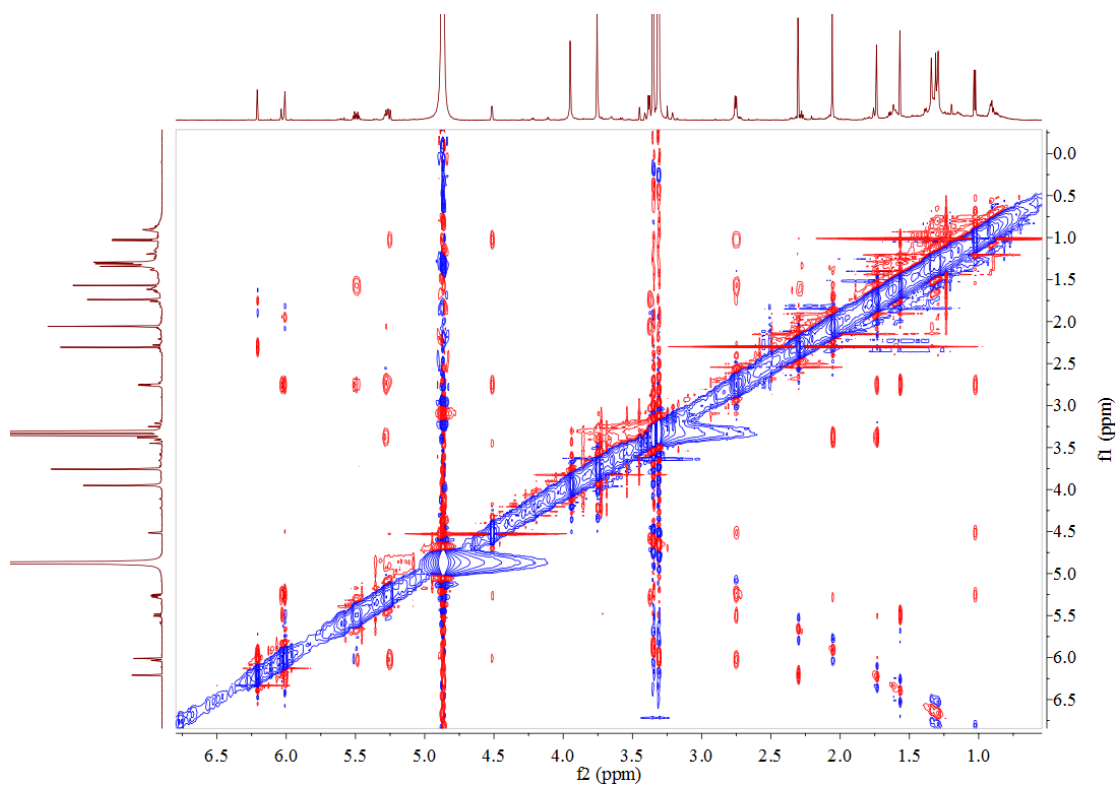

**Figure S9.** NOESY spectrum of piericidin L (**1**) (CD<sub>3</sub>OD)

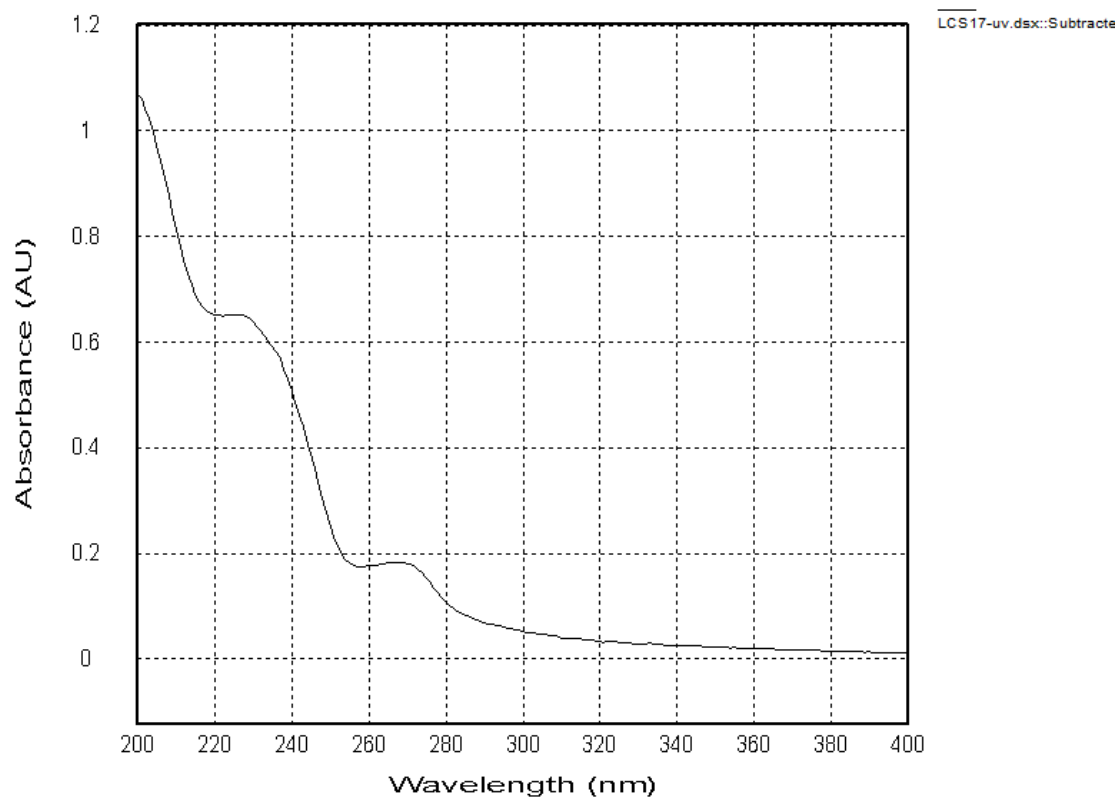

**Figure S10.** UV spectrum of piericidin L (**1**)

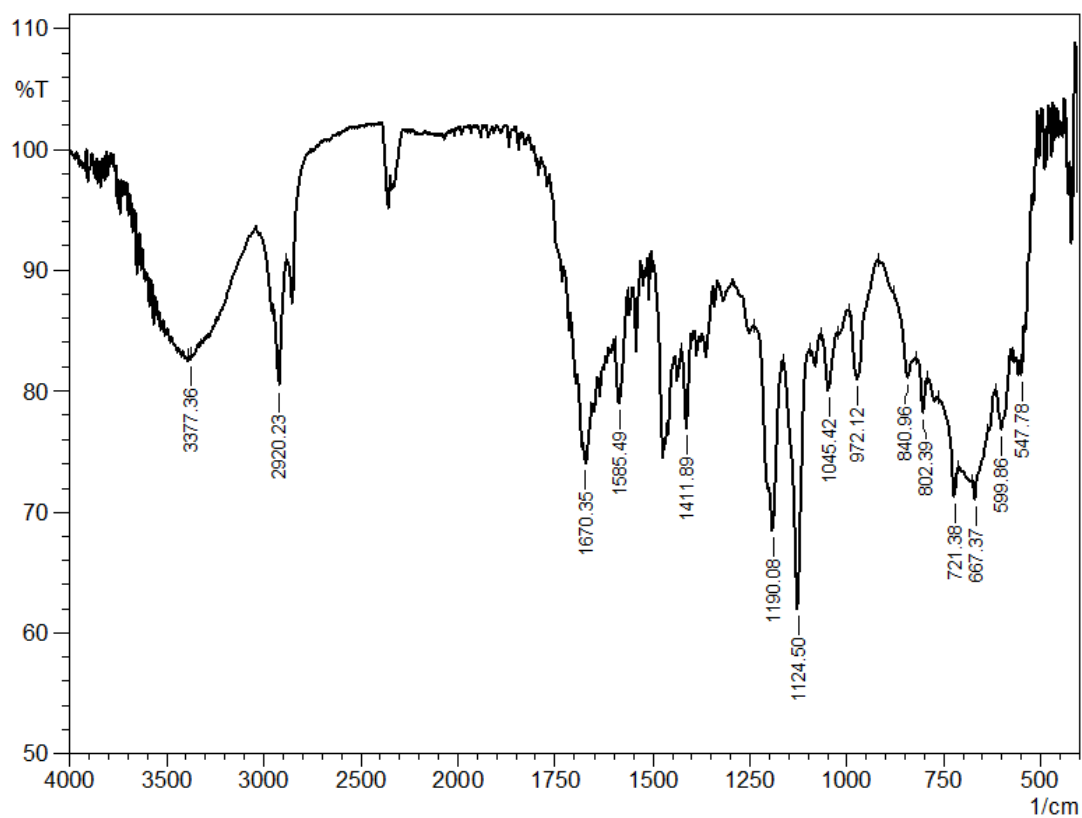

**Figure S11.** IR spectrum of piericidin L (**1**)

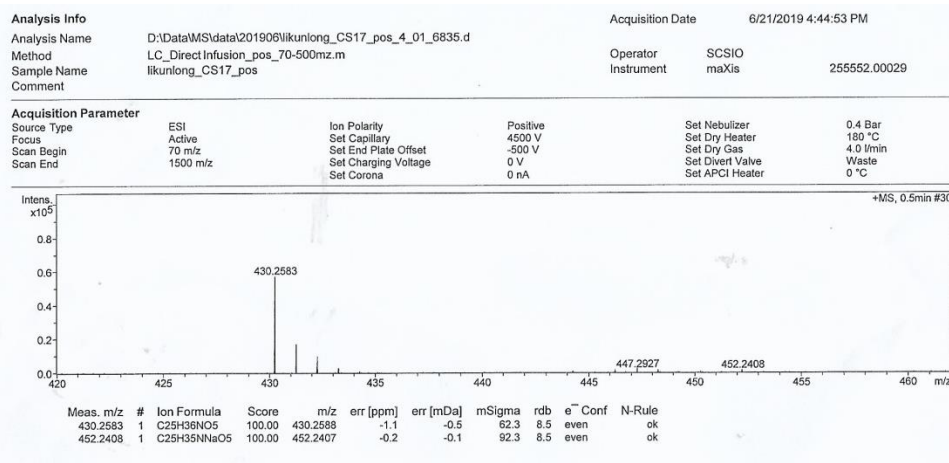

**Figure S12.** HRESIMS spectrum of piericidin (**1**)

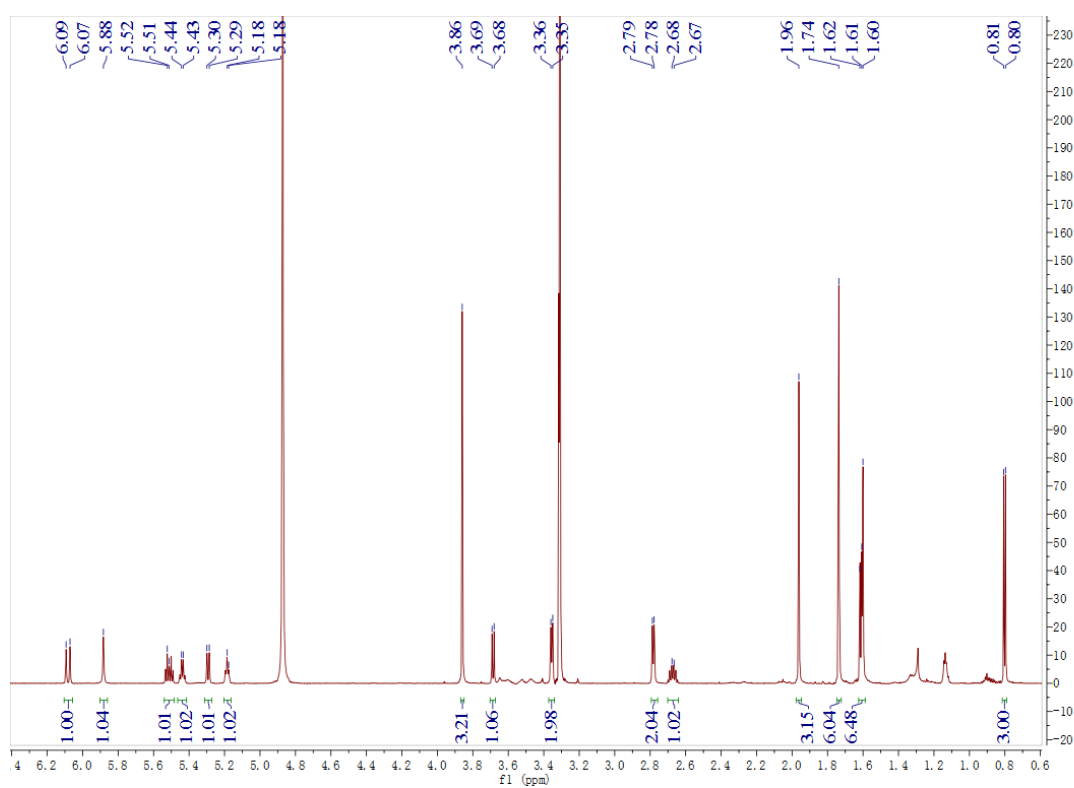

**Figure S13.** <sup>1</sup>H NMR spectrum of piericidin M (**2**) (CD<sub>3</sub>OD, 700MHz)



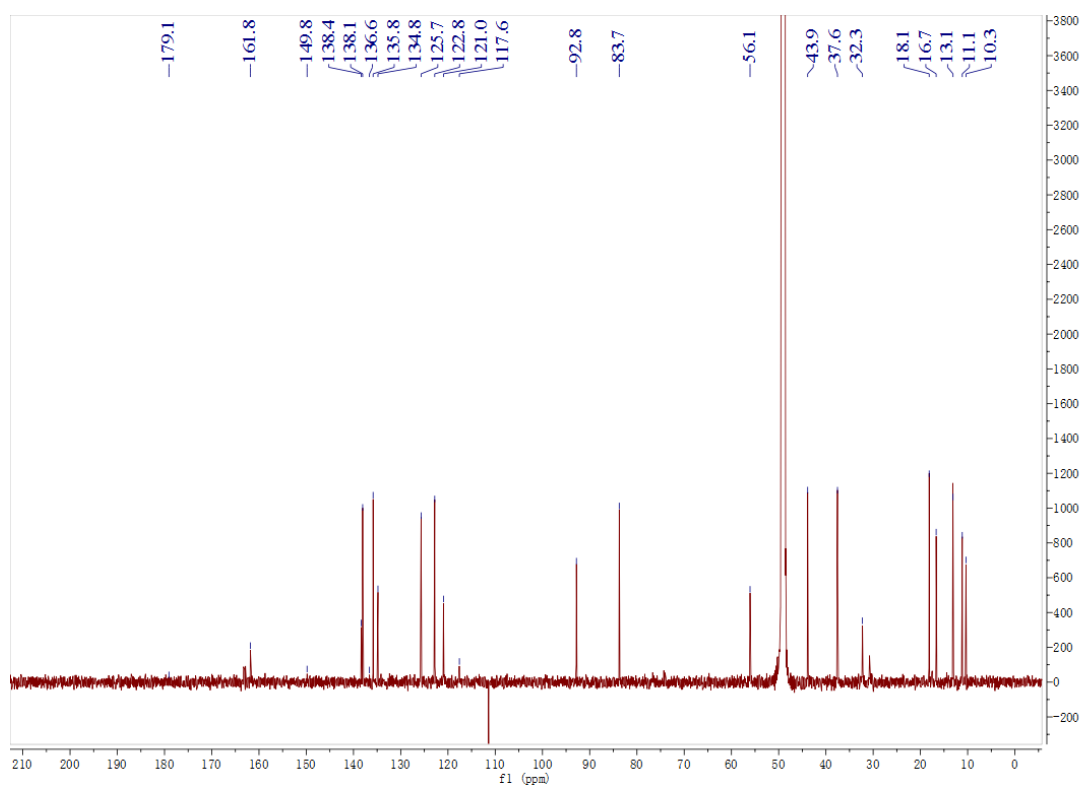

**Figure S14.**  $^{13}\text{C}$  NMR spectrum of piericidin M (**2**) ( $\text{CD}_3\text{OD}$ , 175MHz)

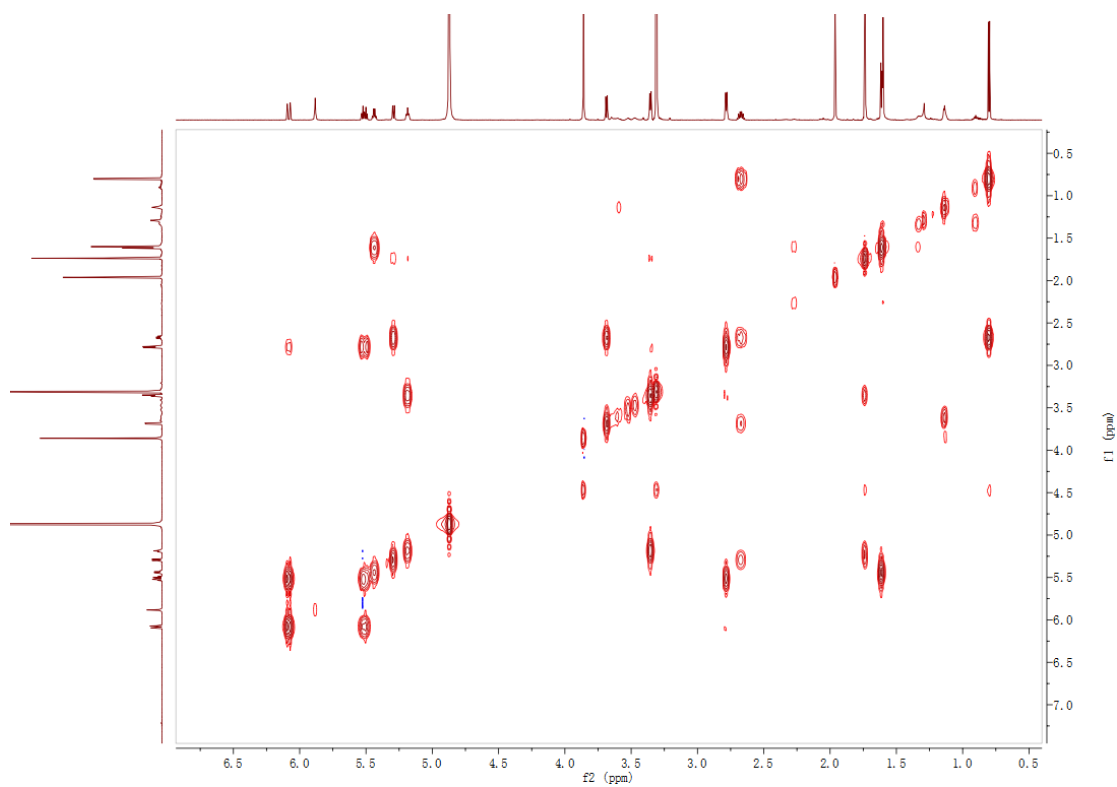

**Figure S15.**  $^1\text{H}$ - $^1\text{H}$  COSY spectrum of piericidin M (**2**) ( $\text{CD}_3\text{OD}$ )

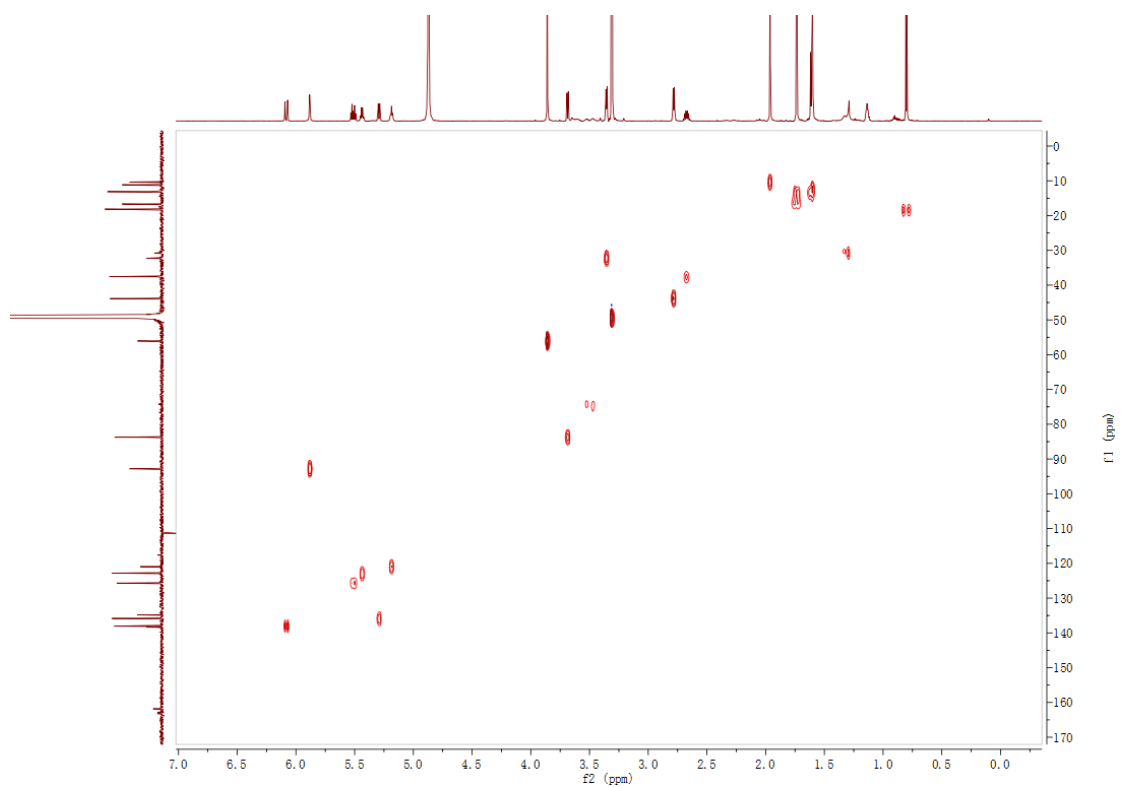

**Figure S16.** HSQC spectrum of piericidin M (**2**) ( $\text{CD}_3\text{OD}$ )

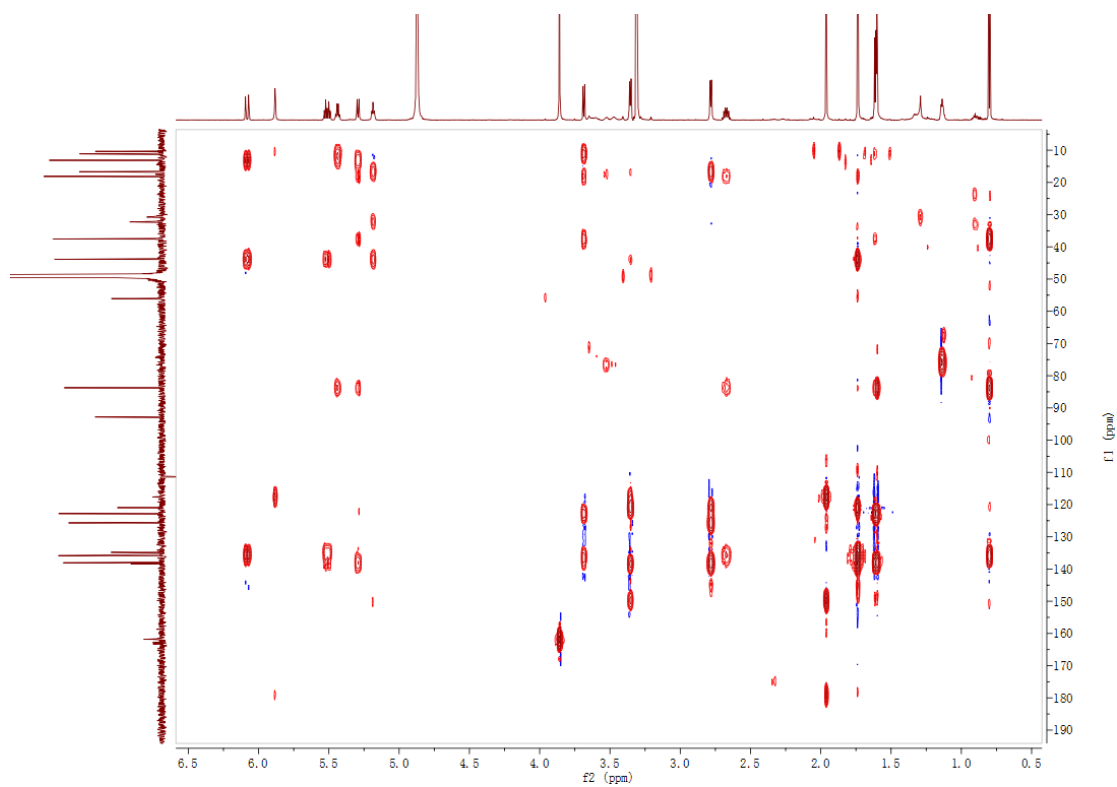

**Figure S17.** HMBC spectrum of piericidin M (**2**) ( $\text{CD}_3\text{OD}$ )

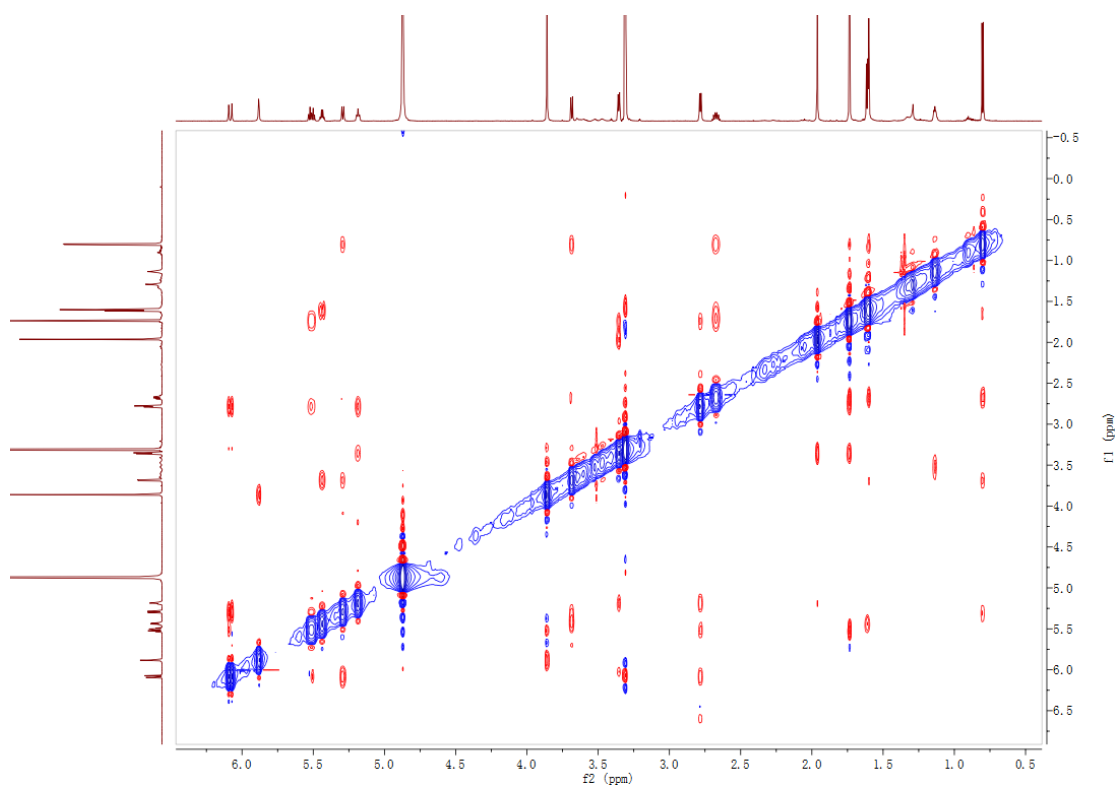

**Figure S18.** NOESY spectrum of piericidin M (**2**) (CD<sub>3</sub>OD)

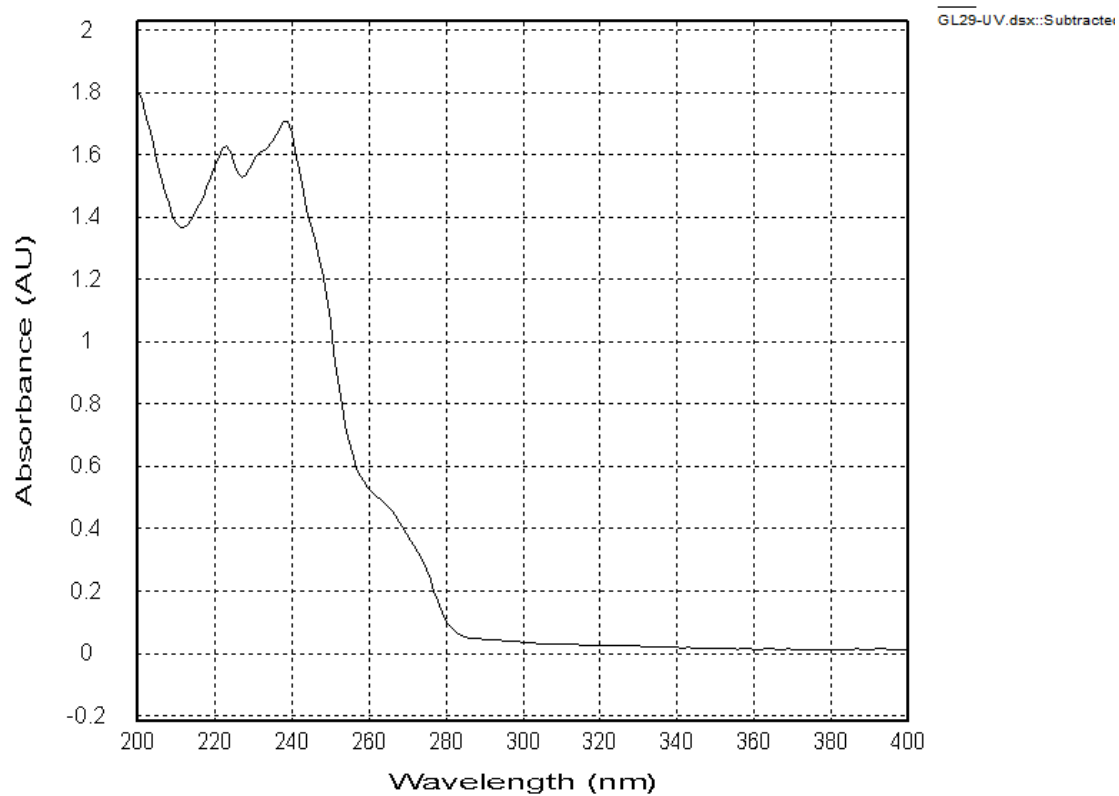

**Figure S19.** UV spectrum of piericidin M (**2**)

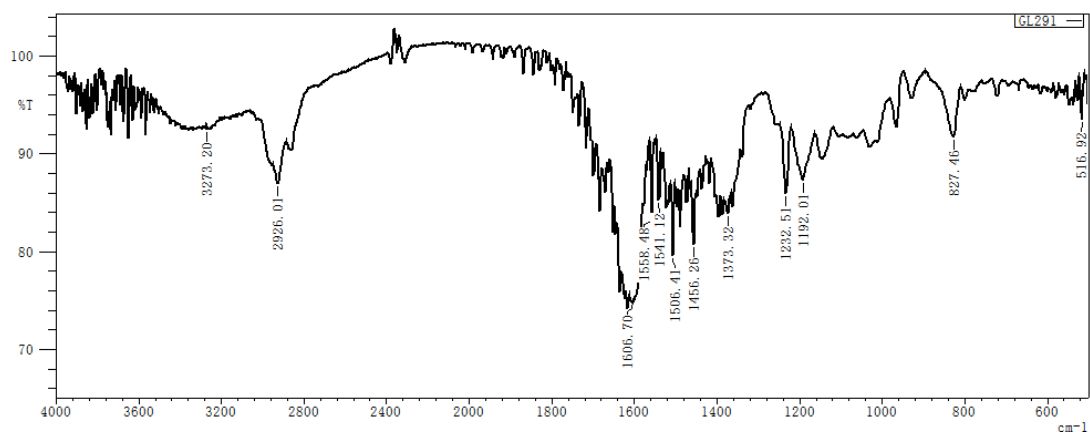

**Figure S20.** IR spectrum of piericidin M (2)

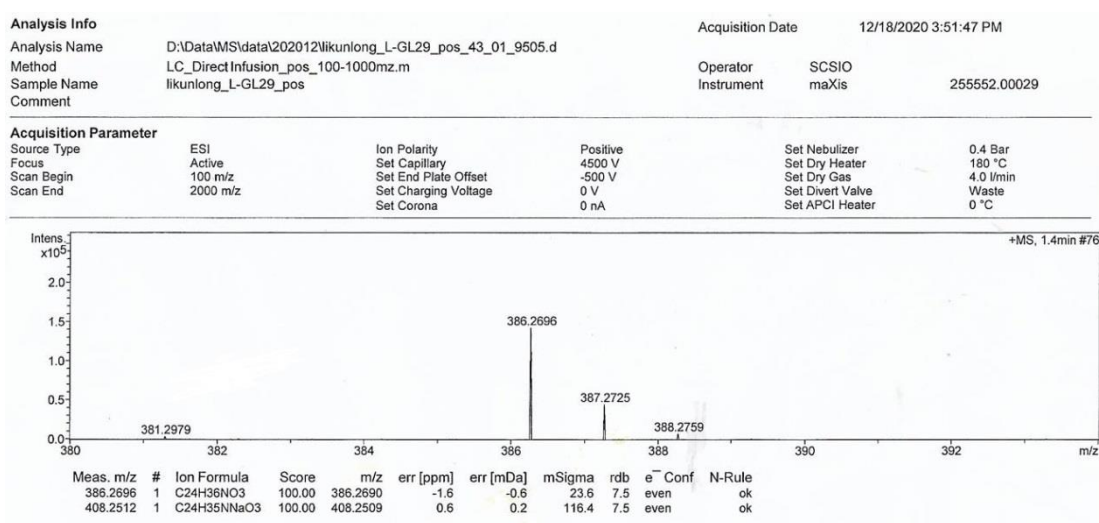

**Figure S21.** HRESIMS spectrum of piericidin M (2)

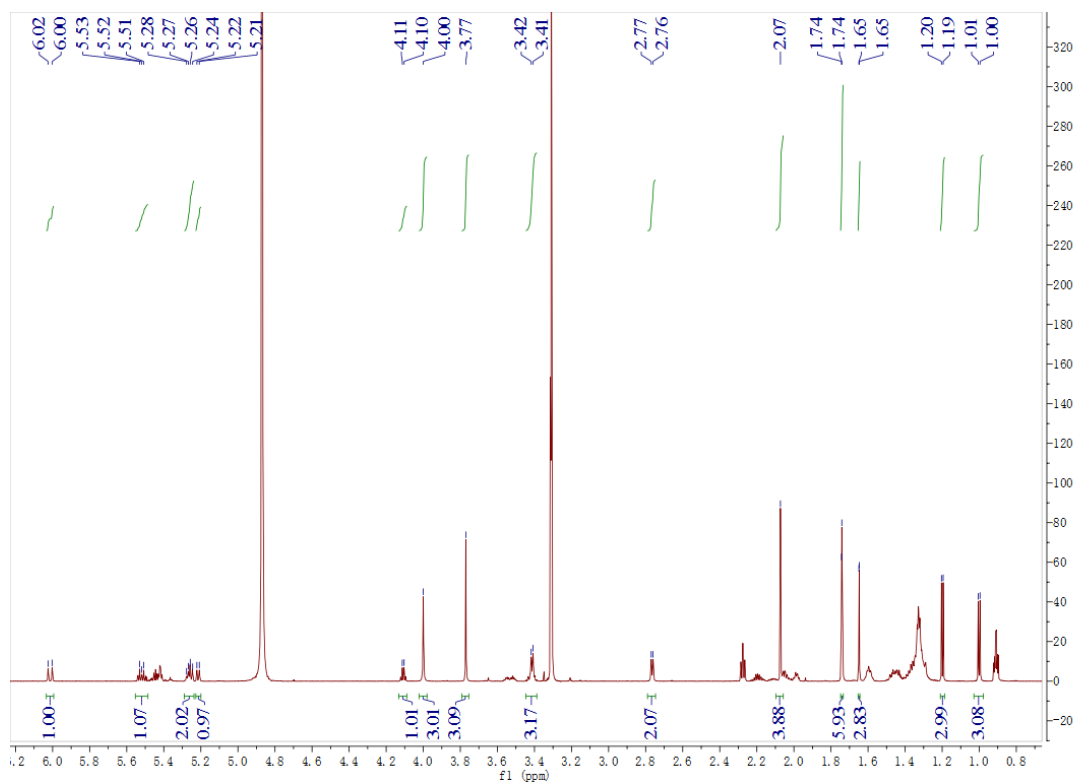

**Figure S22.**  $^1\text{H}$  NMR spectrum of piericidin N (**3**) ( $\text{CD}_3\text{OD}$ , 700MHz)

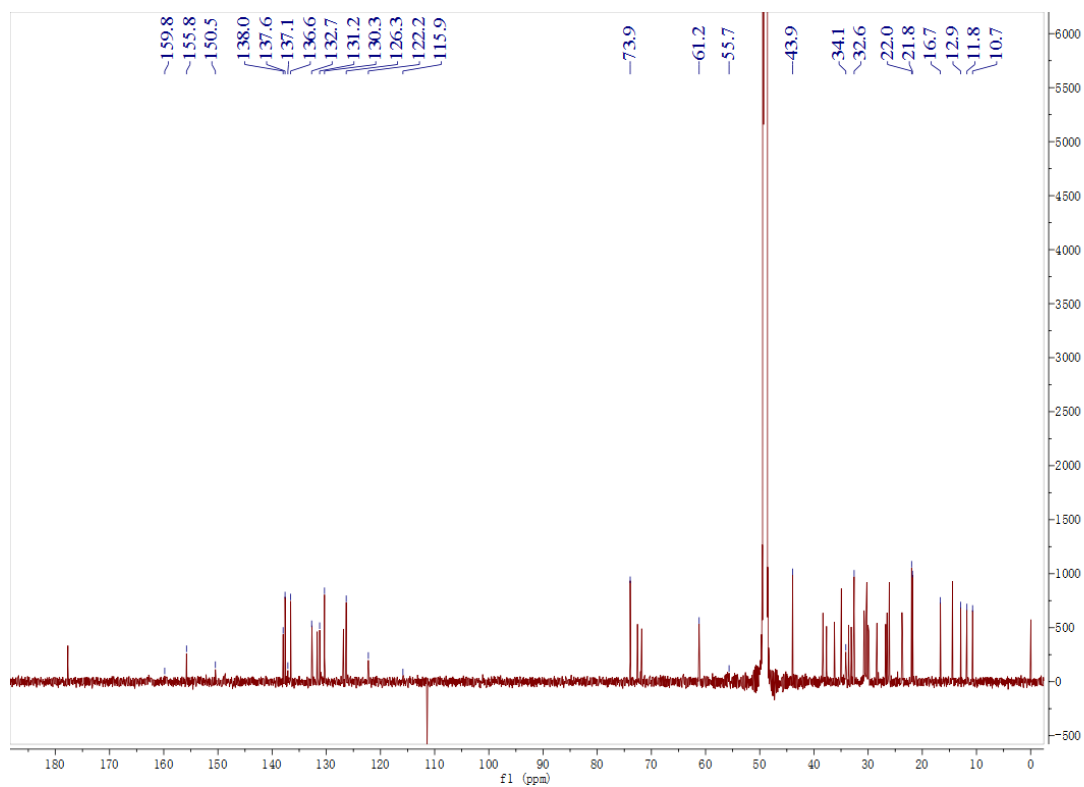

**Figure S23.**  $^{13}\text{C}$  NMR spectrum of piericidin N (**3**) ( $\text{CD}_3\text{OD}$ , 175MHz)

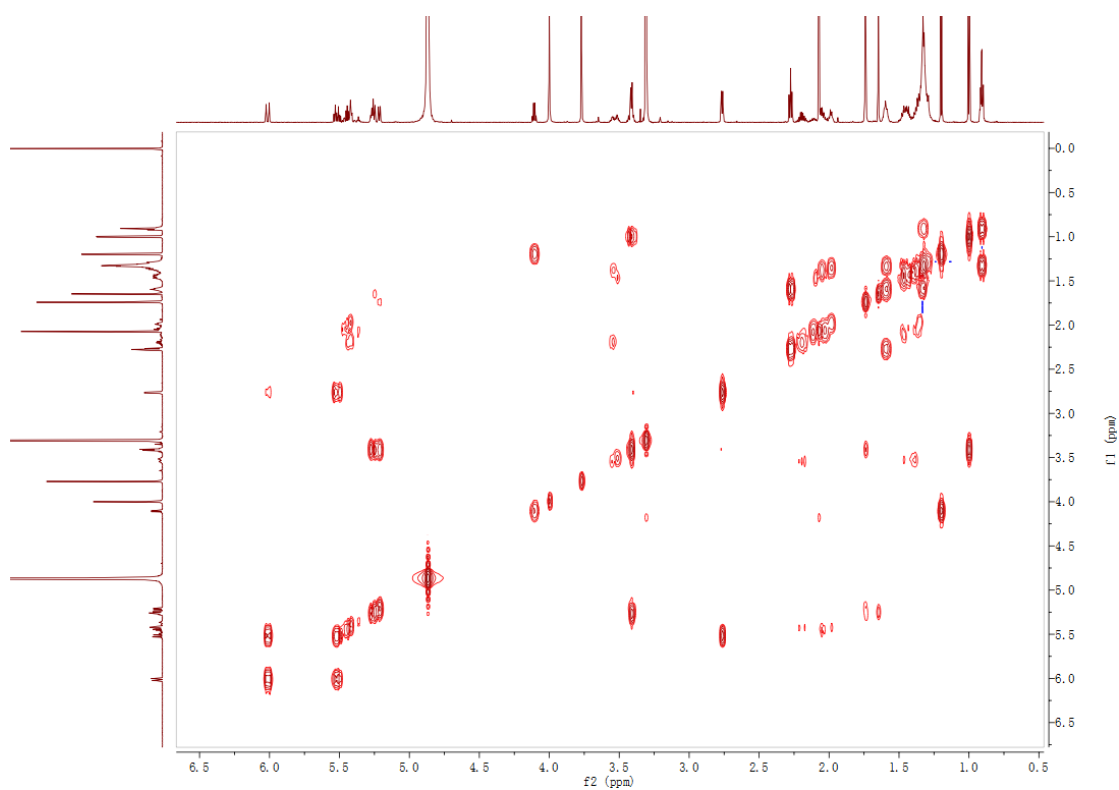

**Figure S24.**  $^1\text{H}$ - $^1\text{H}$  COSY spectrum of piericidin N (**3**) ( $\text{CD}_3\text{OD}$ )

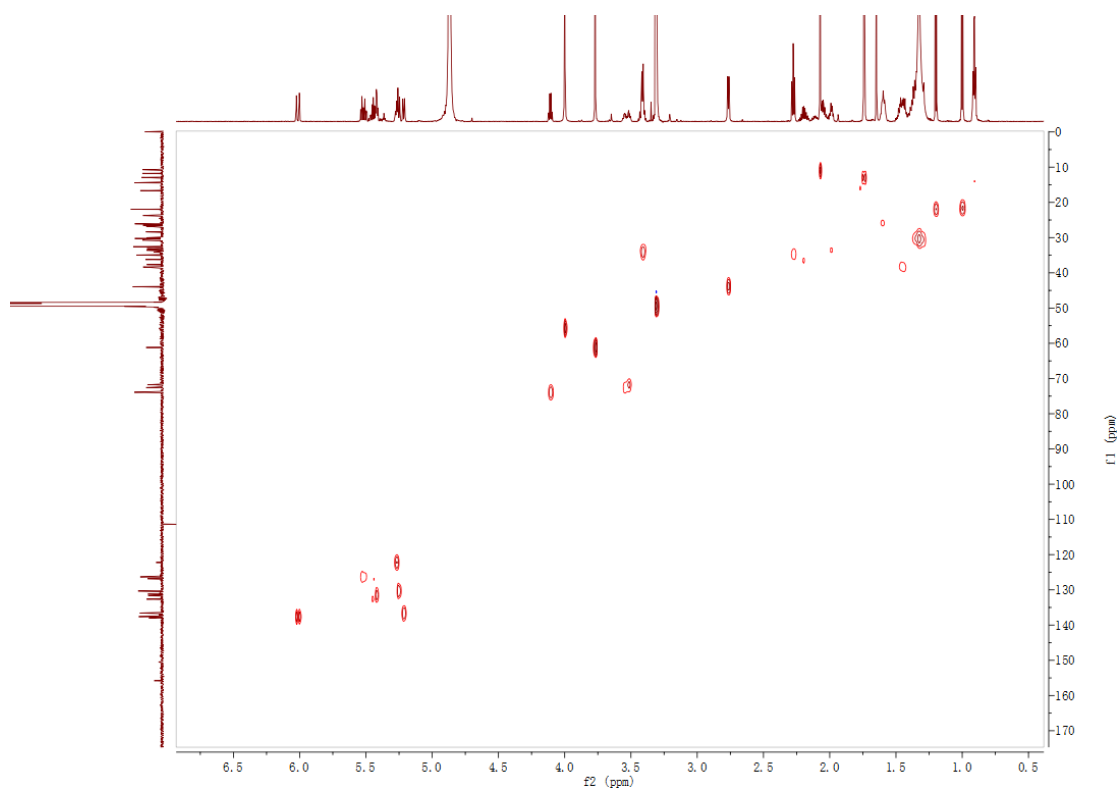

**Figure S25.** HSQC spectrum of piericidin N (**3**) ( $\text{CD}_3\text{OD}$ )

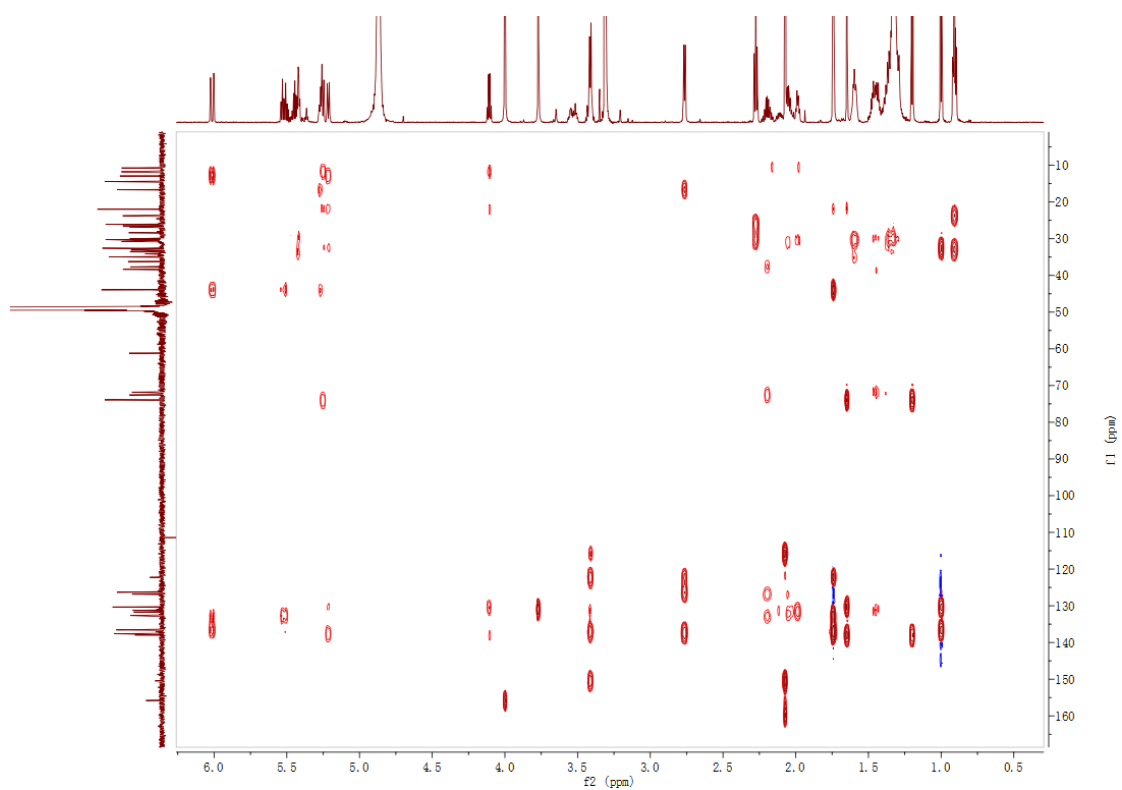

**Figure S26.** HMBC spectrum of piericidin N (**3**) (CD<sub>3</sub>OD)

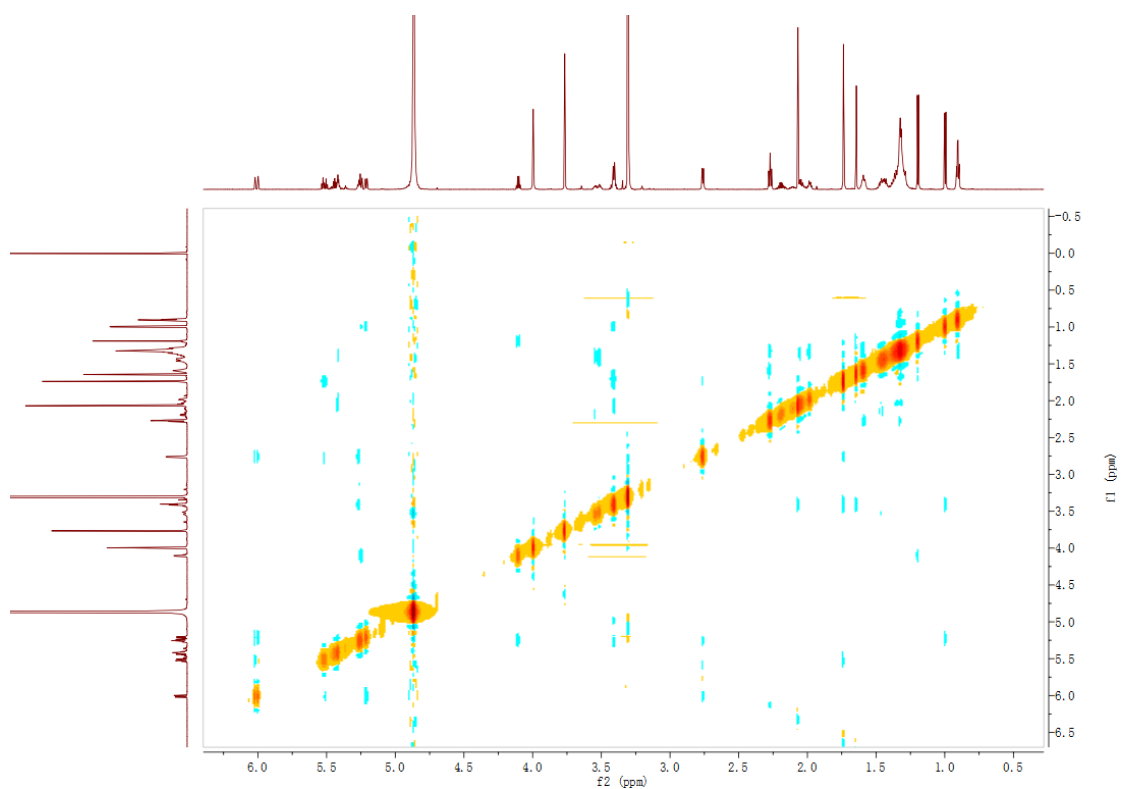

**Figure S27.** NOESY spectrum of piericidin N (**3**) (CD<sub>3</sub>OD)

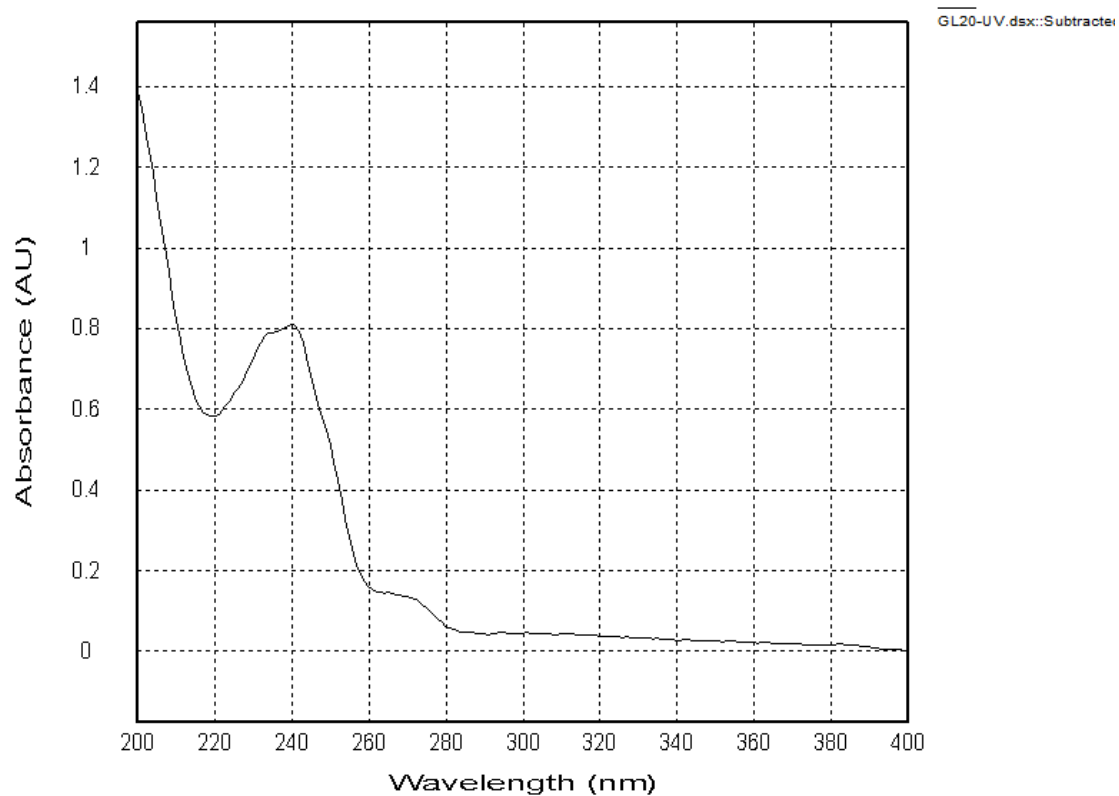

**Figure S28.** UV spectrum of piericidin N (**3**)

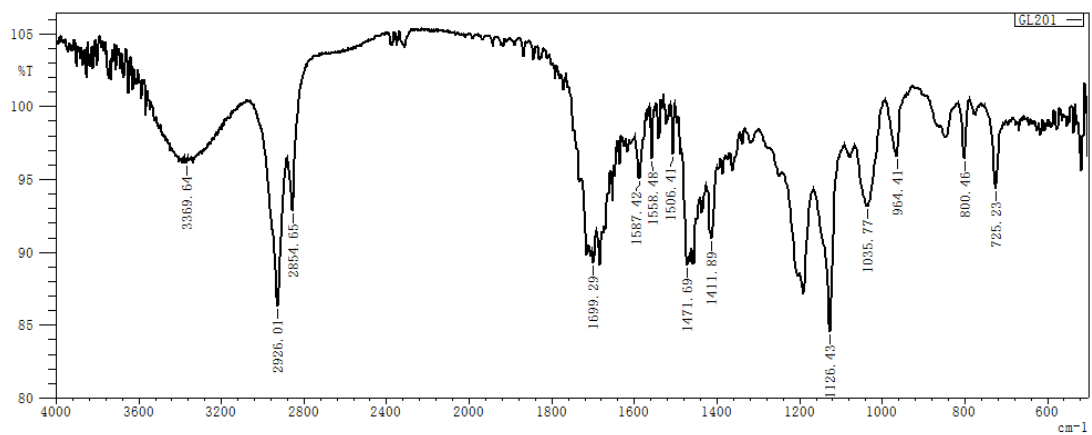

**Figure S29.** IR spectrum of piericidin N (**3**)



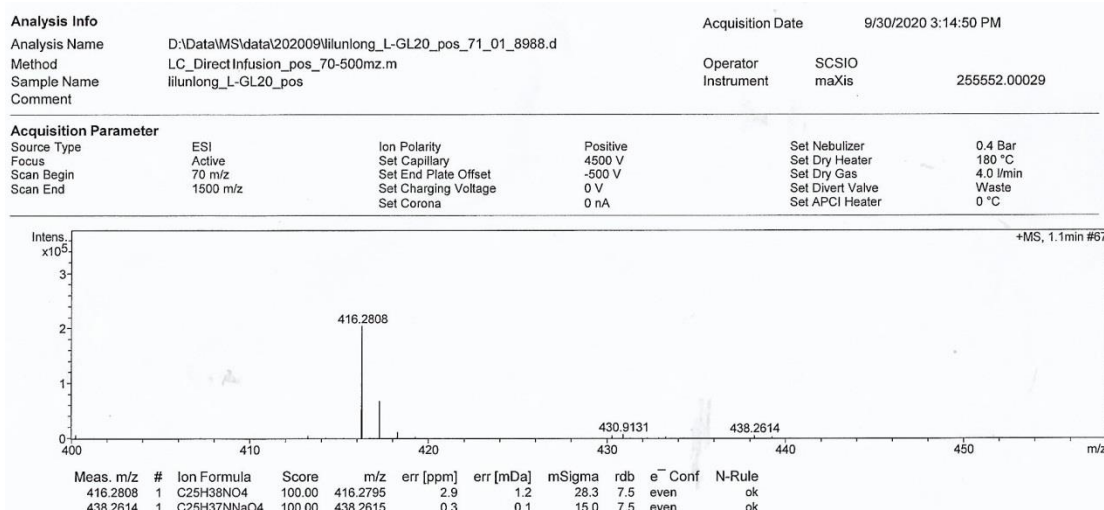

**Figure S30.** HRESIMS spectrum of piericidin N (**3**)

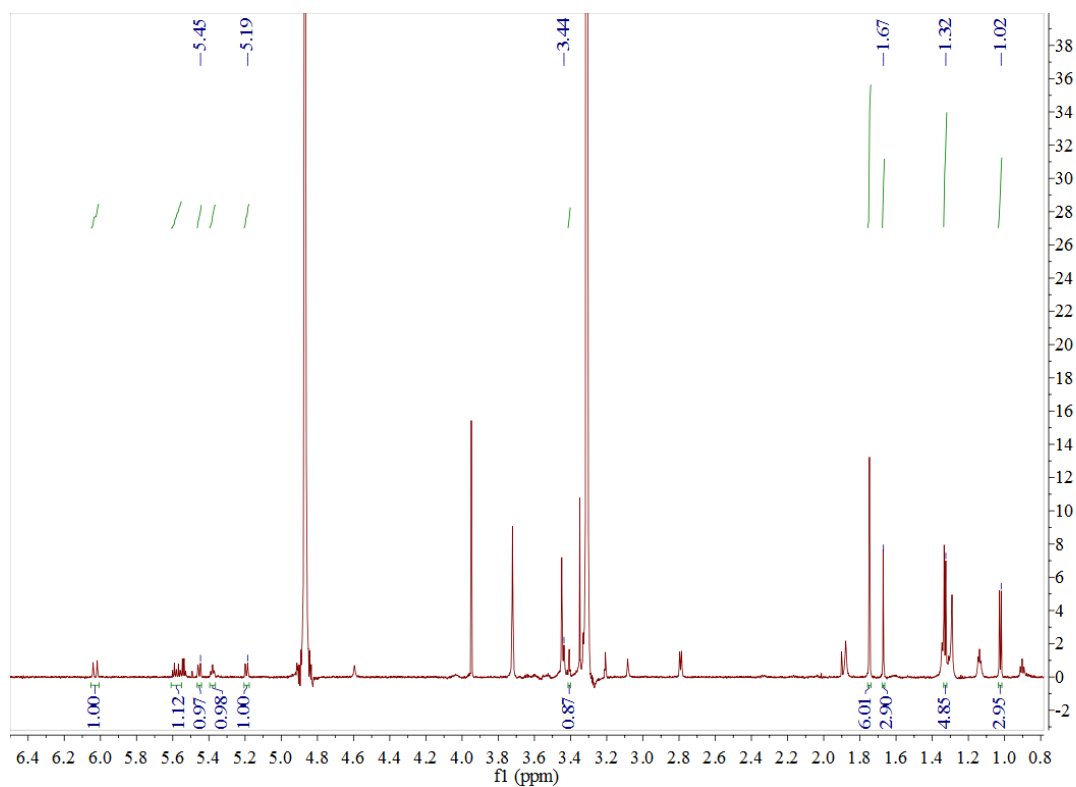

**Figure S31.** <sup>1</sup>H NMR spectrum of **3A** (CD<sub>3</sub>OD, 700MHz)

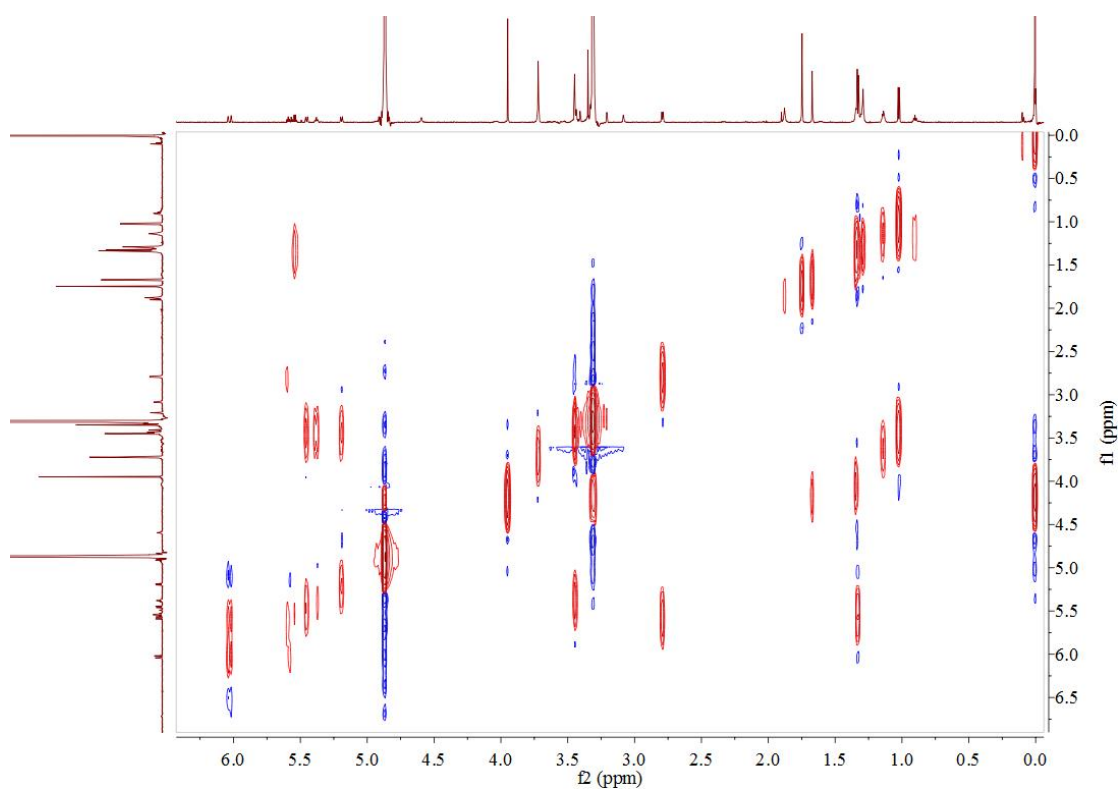

**Figure S32.**  $^1\text{H}$ - $^1\text{H}$  COSY spectrum of **3A** ( $\text{CD}_3\text{OD}$ )

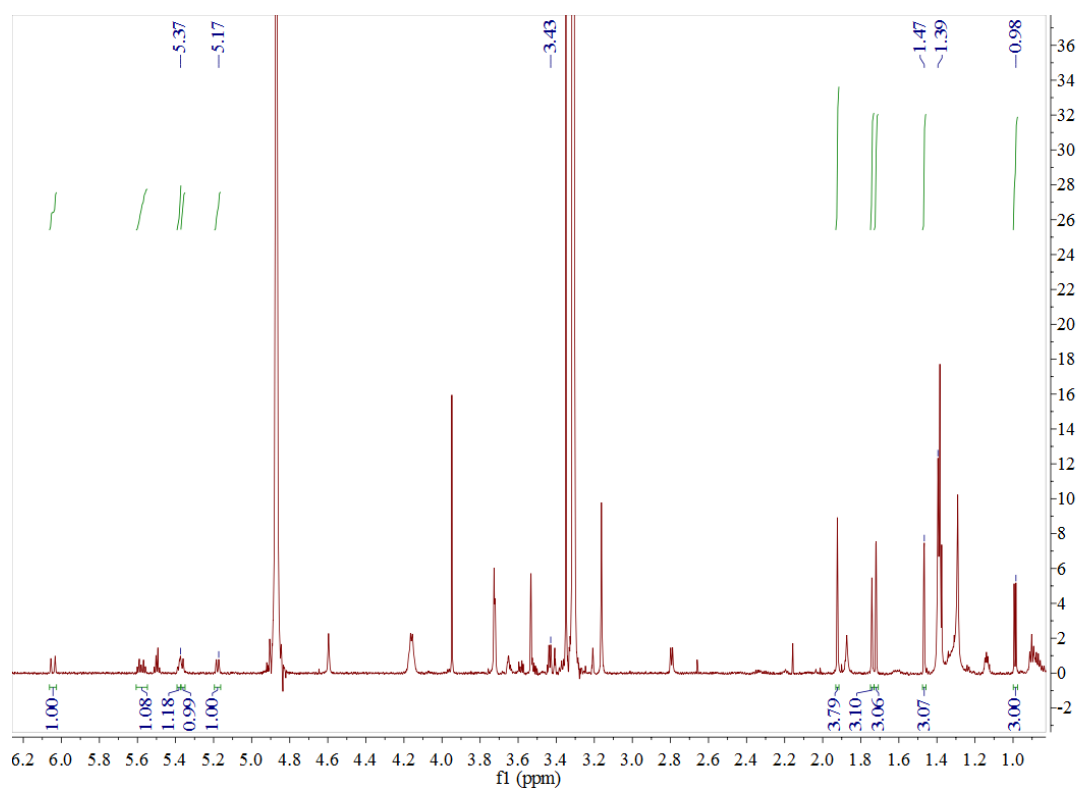

**Figure S33.**  $^1\text{H}$  NMR spectrum of **3B** ( $\text{CD}_3\text{OD}$ , 700MHz)

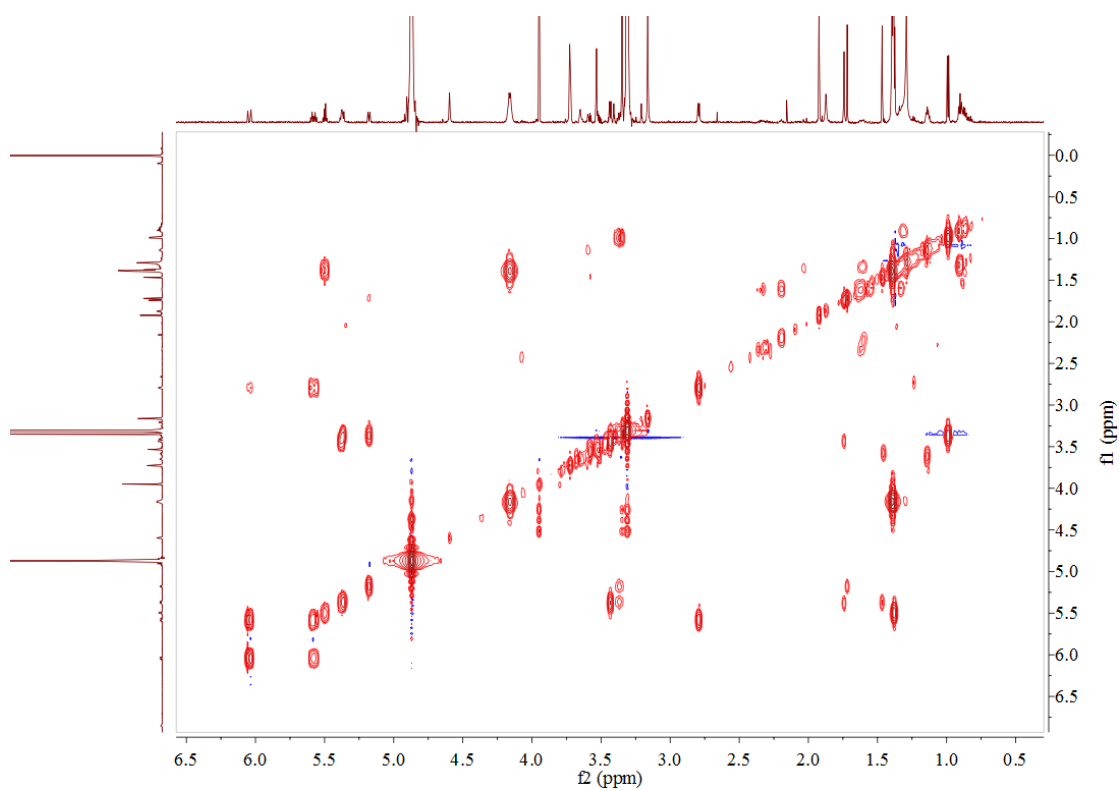

**Figure S34.**  $^1\text{H}$ - $^1\text{H}$  COSY spectrum of **3B** ( $\text{CD}_3\text{OD}$ )

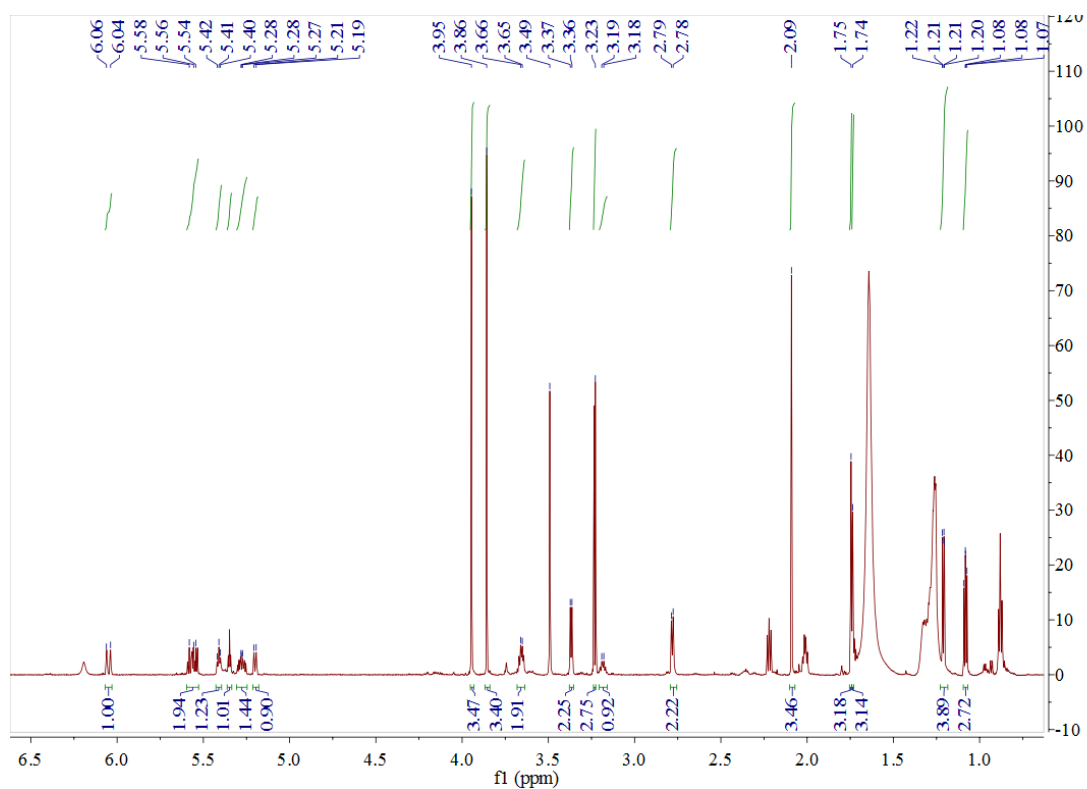

**Figure S35.**  $^1\text{H}$  NMR spectrum of piericidin O (**4**) ( $\text{CD}_3\text{OD}$ , 700MHz)

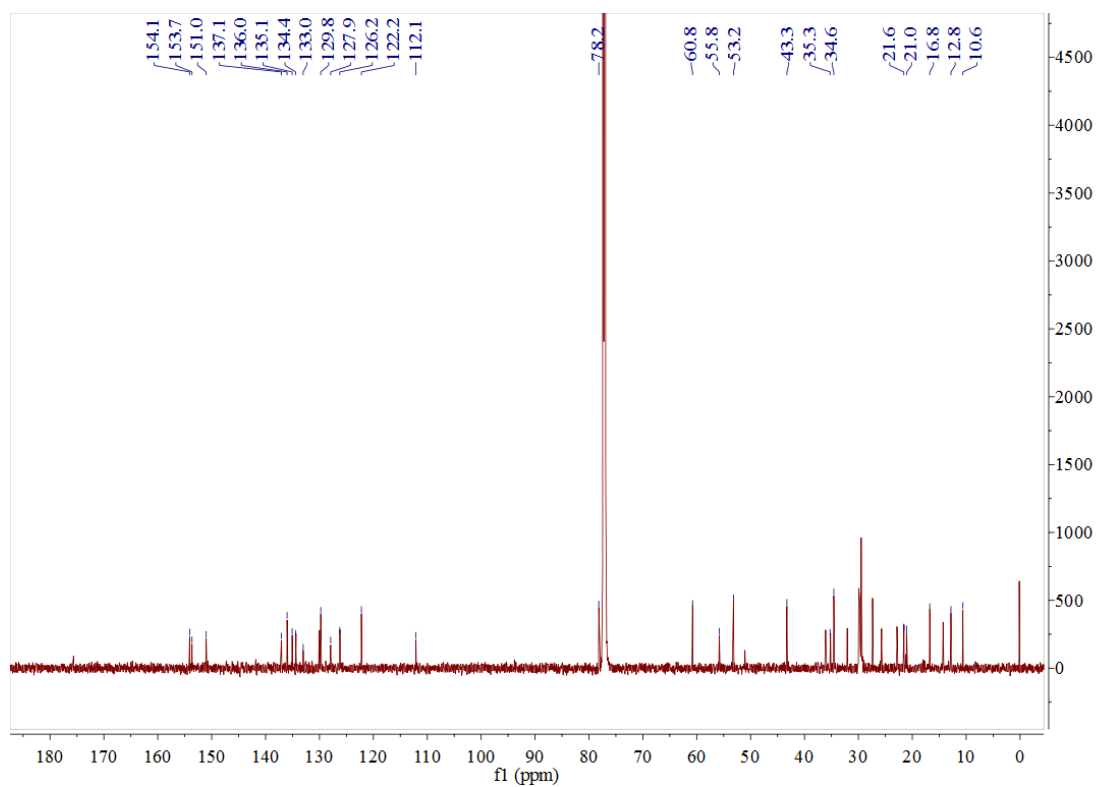

**Figure S36.**  $^{13}\text{C}$  NMR spectrum of piericidin O (**4**) ( $\text{CD}_3\text{OD}$ , 175MHz)

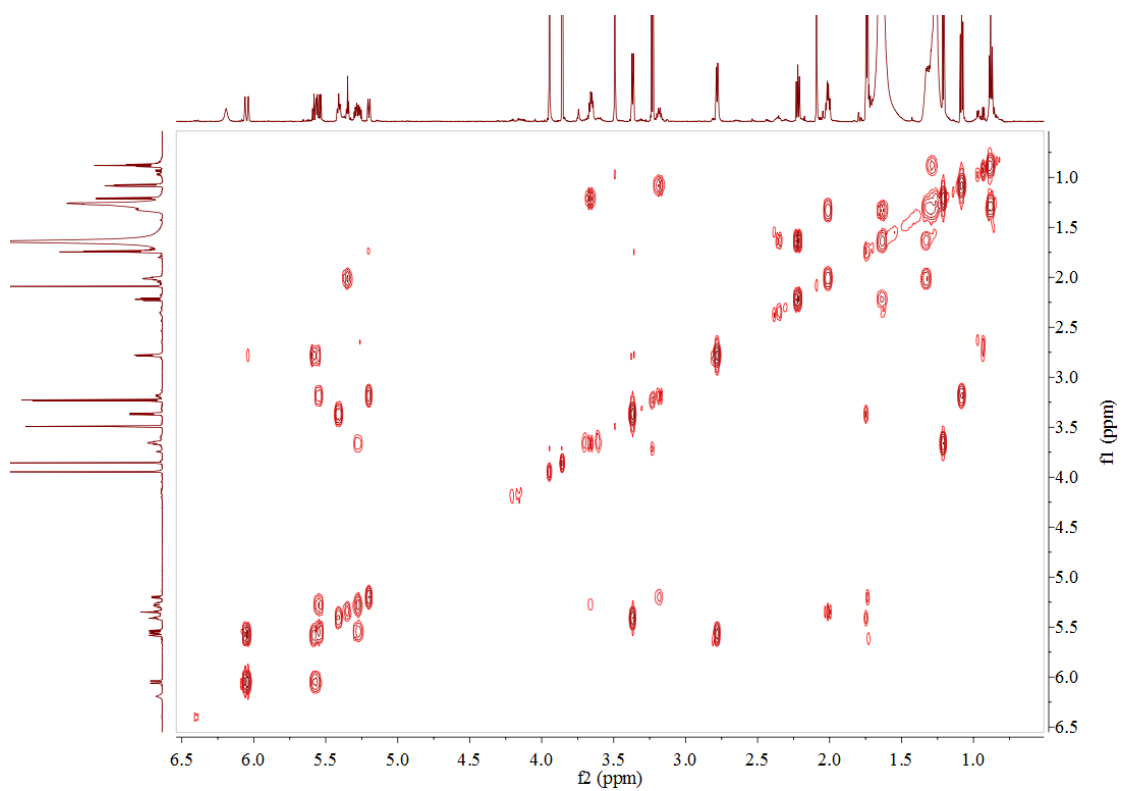

**Figure S37.**  $^1\text{H}$ - $^1\text{H}$  COSY spectrum of piericidin O (**4**) ( $\text{CD}_3\text{OD}$ )

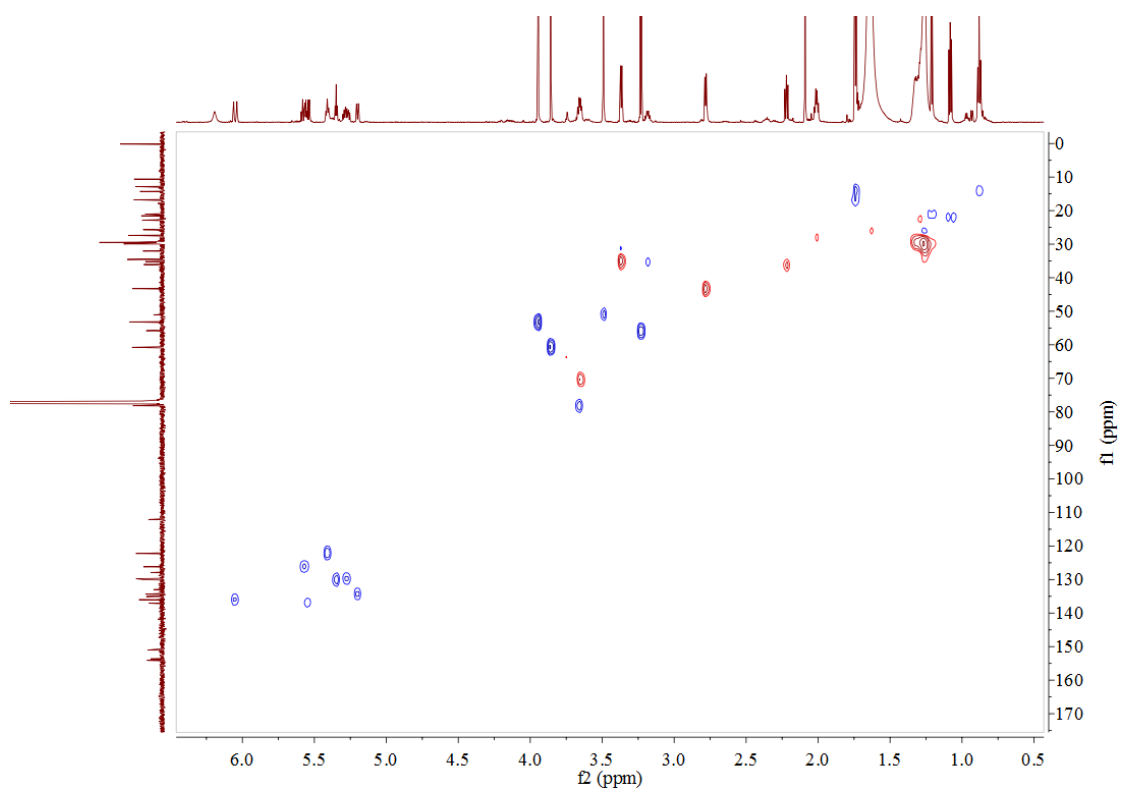

**Figure S38.** HSQC spectrum of piericidin O (**4**) (CD<sub>3</sub>OD)

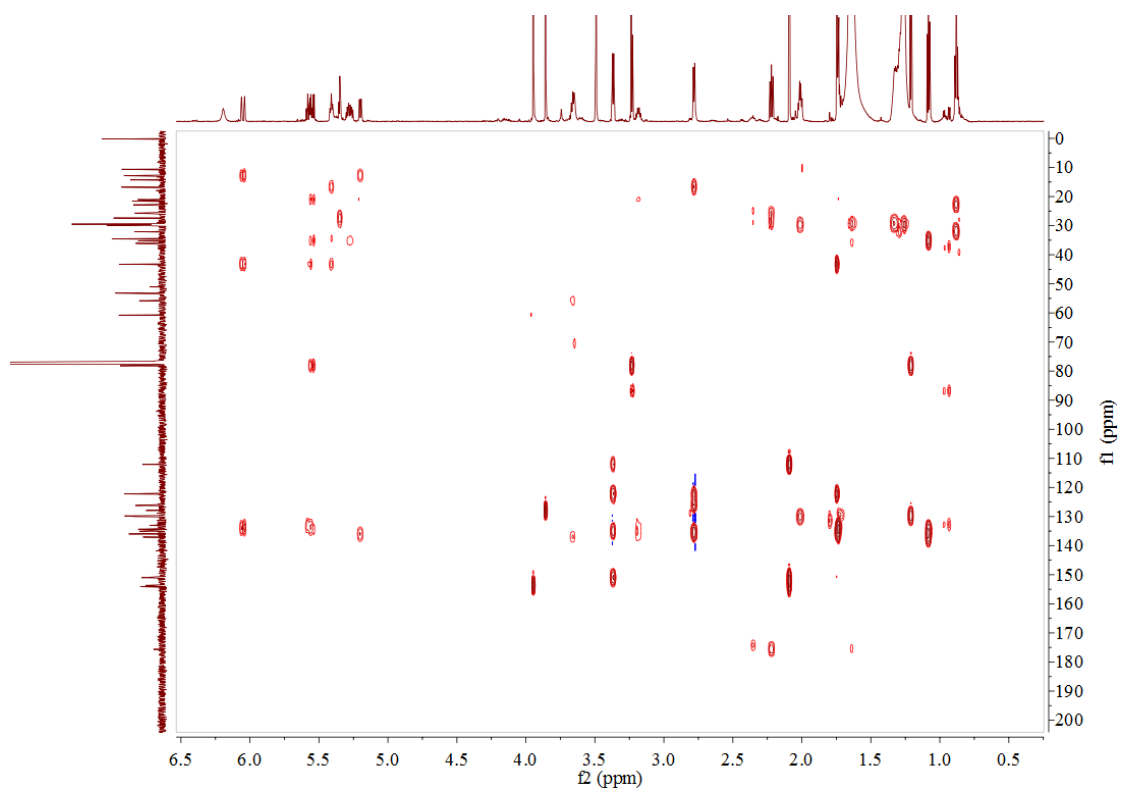

**Figure S39.** HMBC spectrum of piericidin O (**4**) (CD<sub>3</sub>OD)

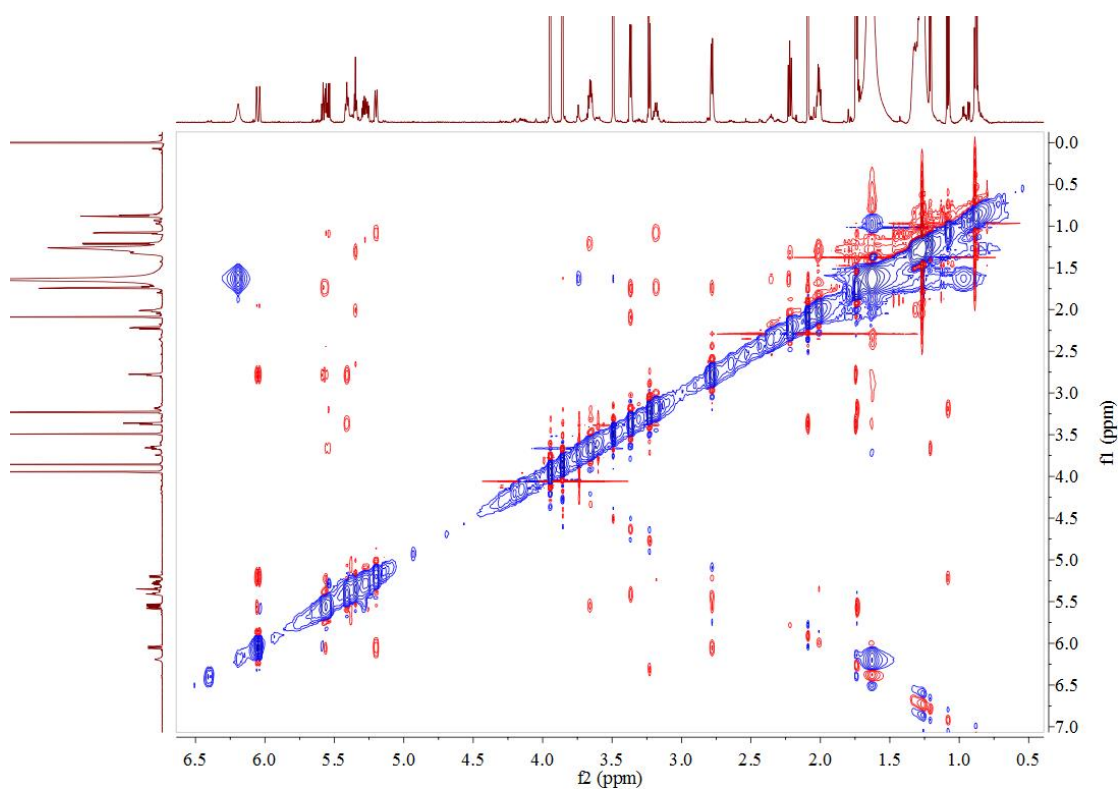

**Figure S40.** NOESY spectrum of piericidin O (**4**) ( $\text{CD}_3\text{OD}$ )

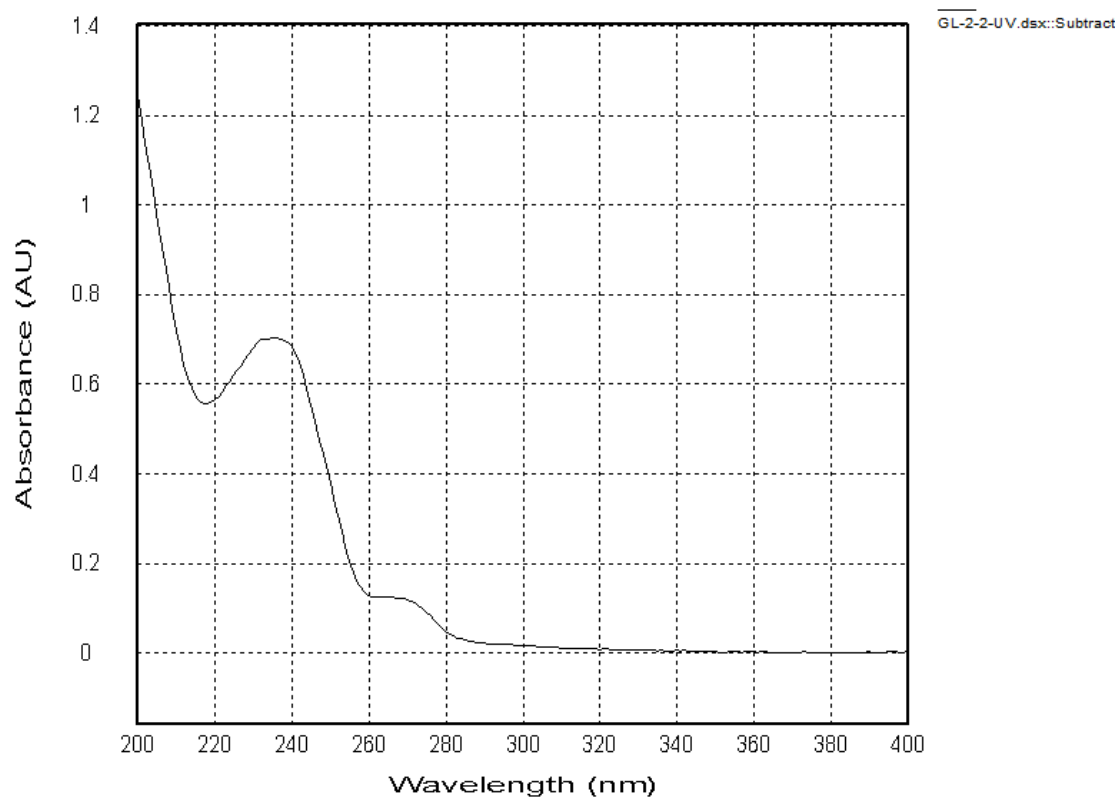

**Figure S41.** UV spectrum of piericidin O (**4**)

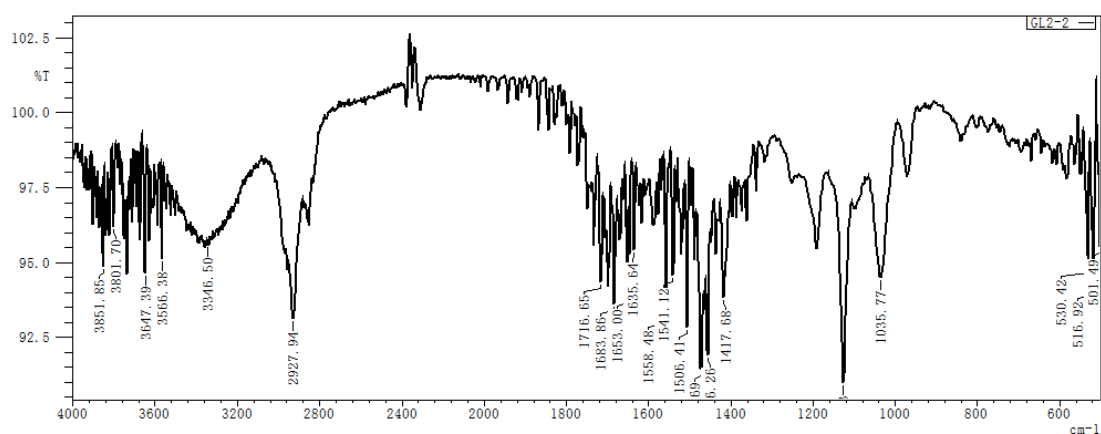

**Figure S42.** IR spectrum of piericidin O (4)

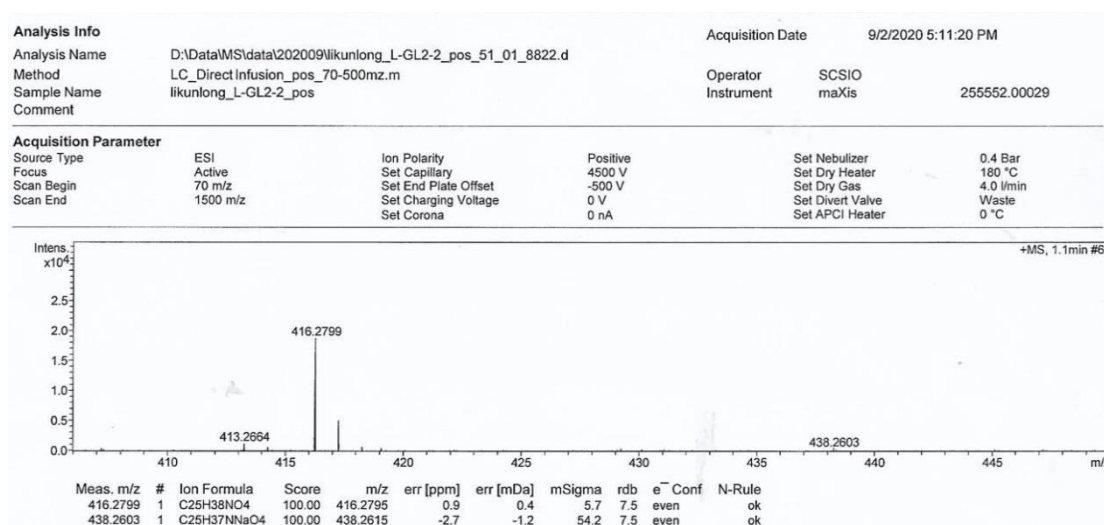

**Figure S43.** HRESIMS spectrum of piericidin O (4)

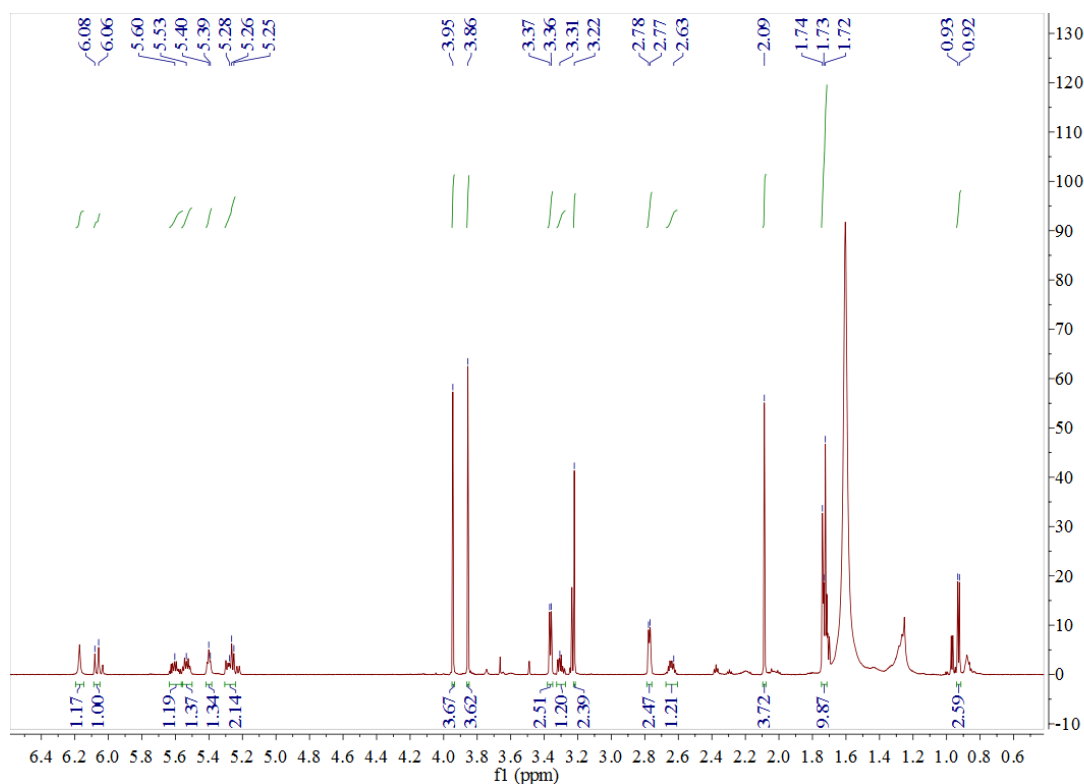

**Figure S44.** <sup>1</sup>H NMR spectrum of piericidin P (**5**) (CD<sub>3</sub>OD, 700MHz)

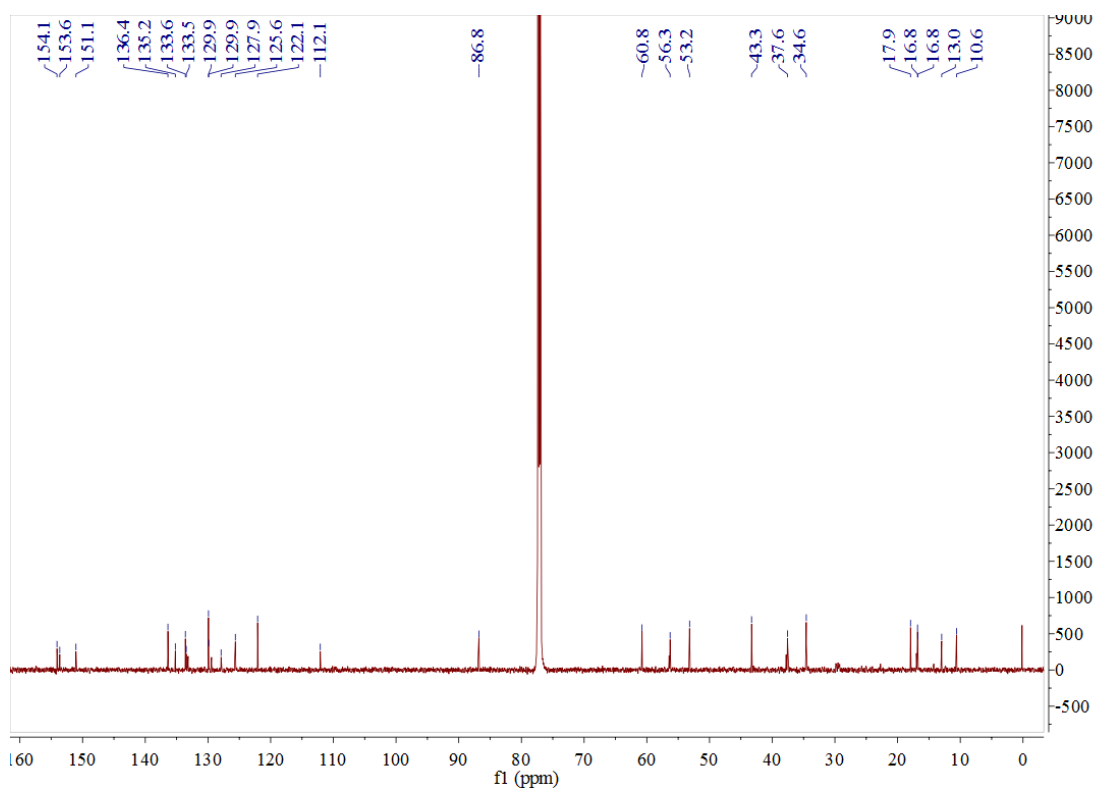

**Figure S45.** <sup>13</sup>C NMR spectrum of piericidin P (**5**) (CD<sub>3</sub>OD, 175MHz)



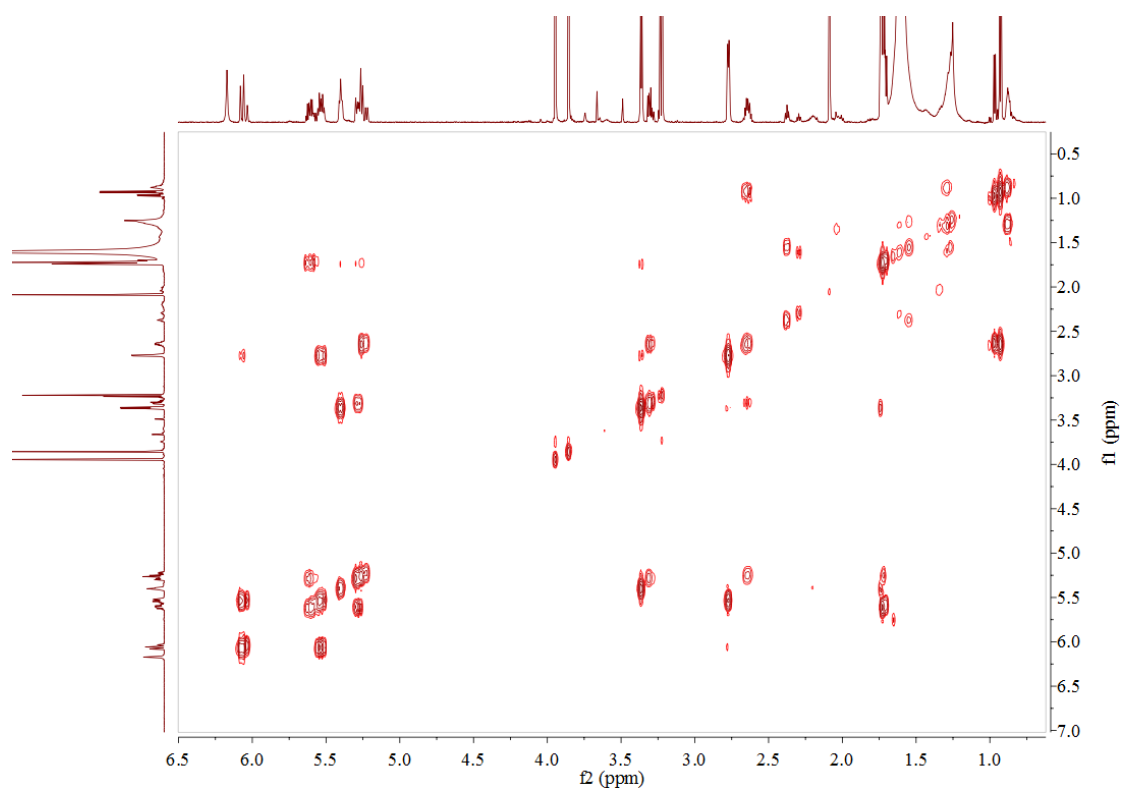

**Figure S46.**  $^1\text{H}$ - $^1\text{H}$  COSY spectrum of piericidin P (**5**) ( $\text{CD}_3\text{OD}$ )

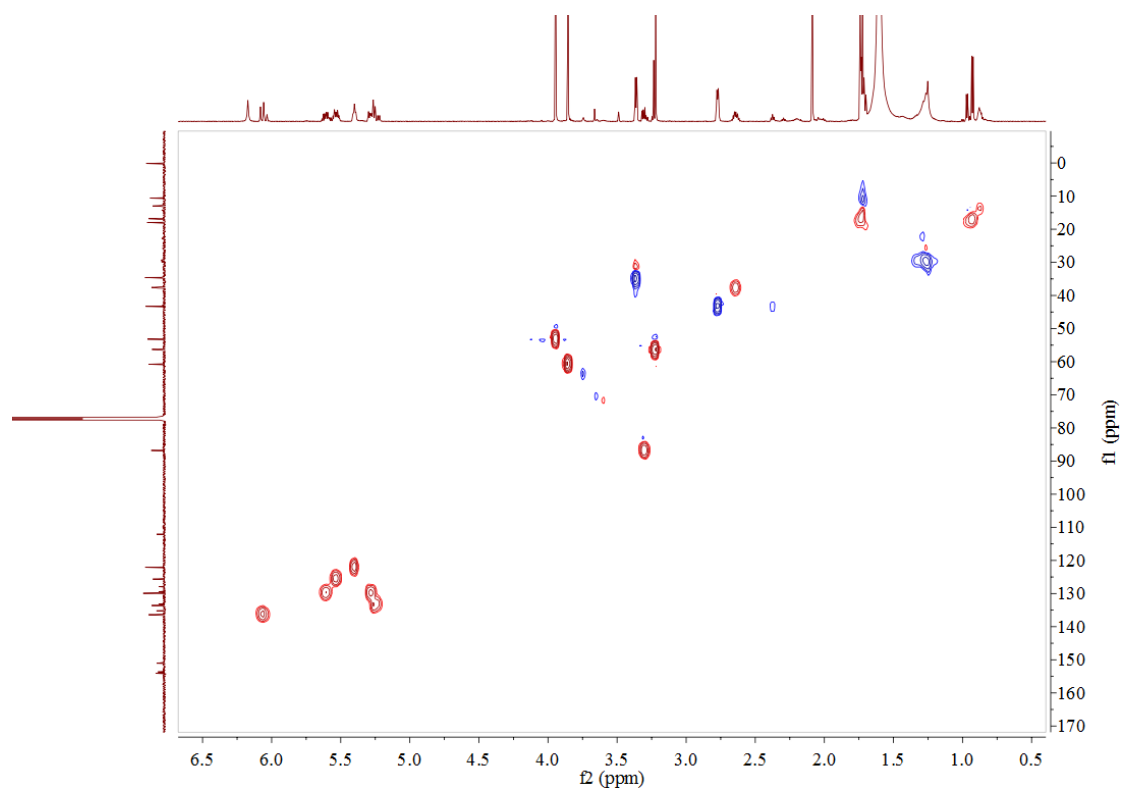

**Figure S47.** HSQC spectrum of piericidin P (**5**) ( $\text{CD}_3\text{OD}$ )

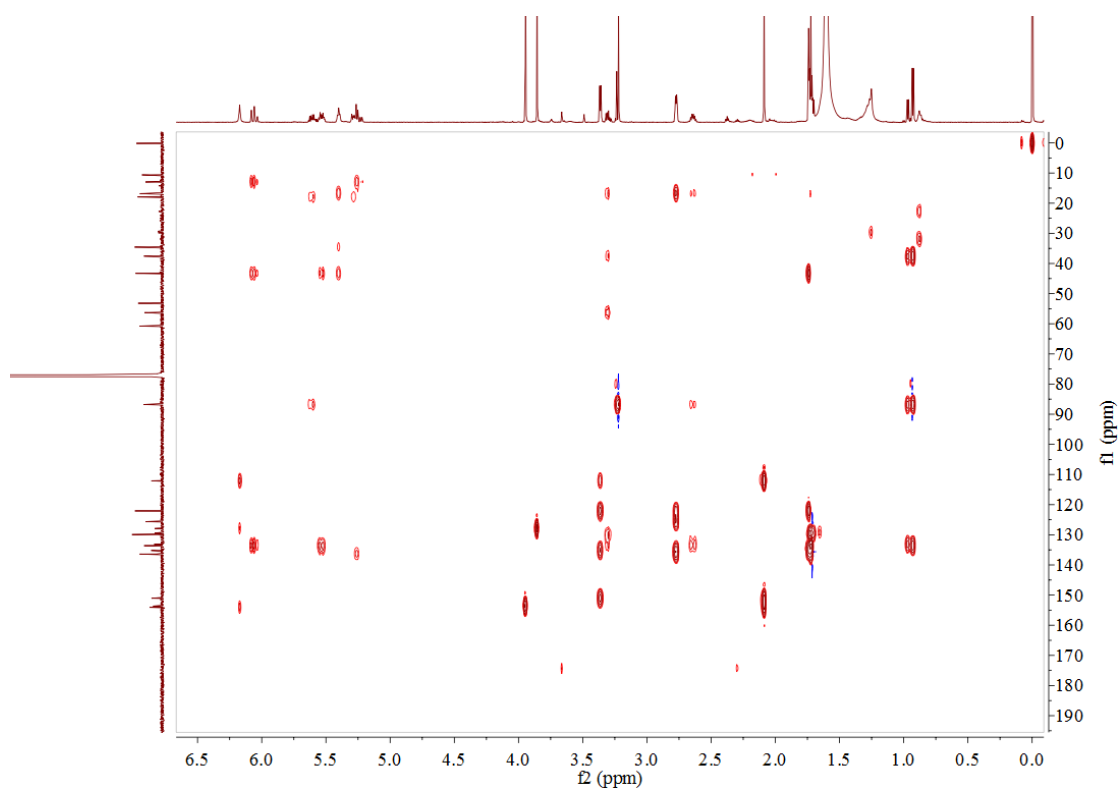

**Figure S48.** HMBC spectrum of piericidin P (**5**) ( $\text{CD}_3\text{OD}$ )

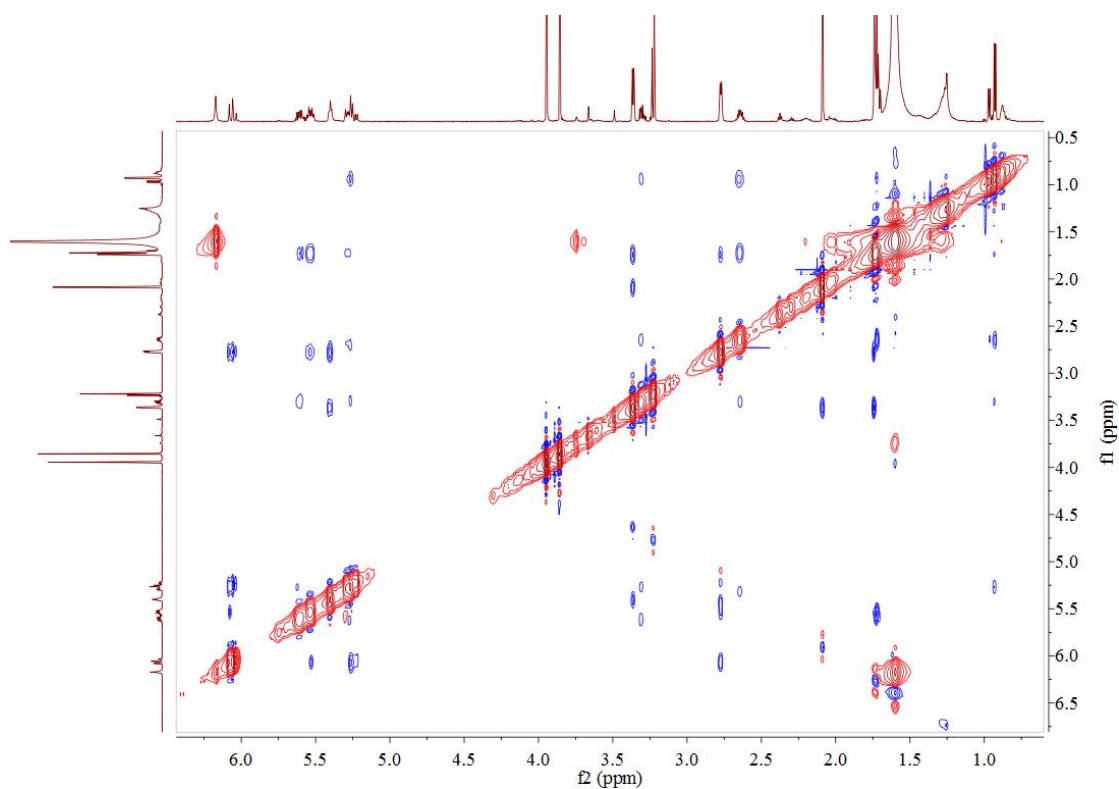

**Figure S49.** NOESY spectrum of piericidin P (**5**) ( $\text{CD}_3\text{OD}$ )

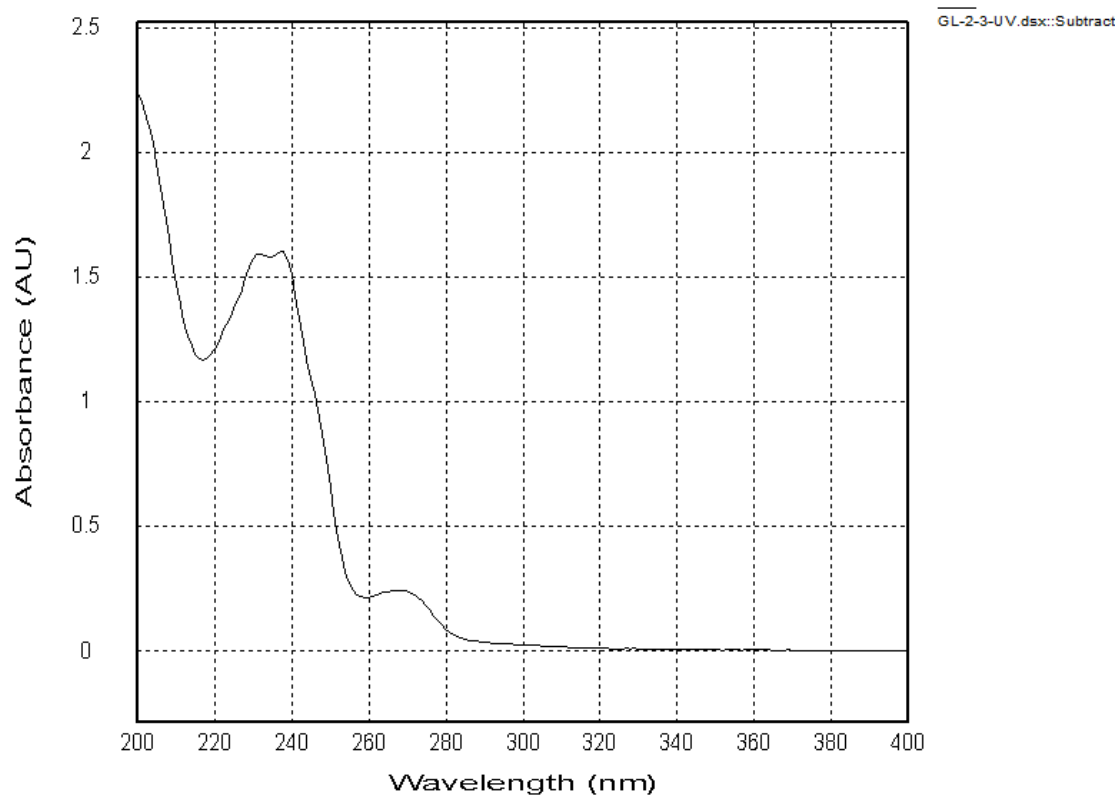

**Figure S50.** UV spectrum of piericidin P (**5**)

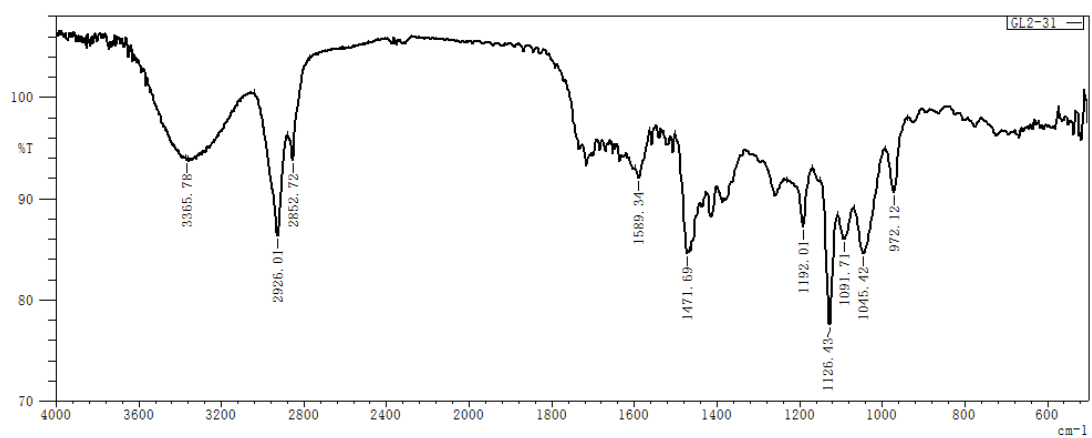

**Figure S51.** IR spectrum of piericidin P (**5**)

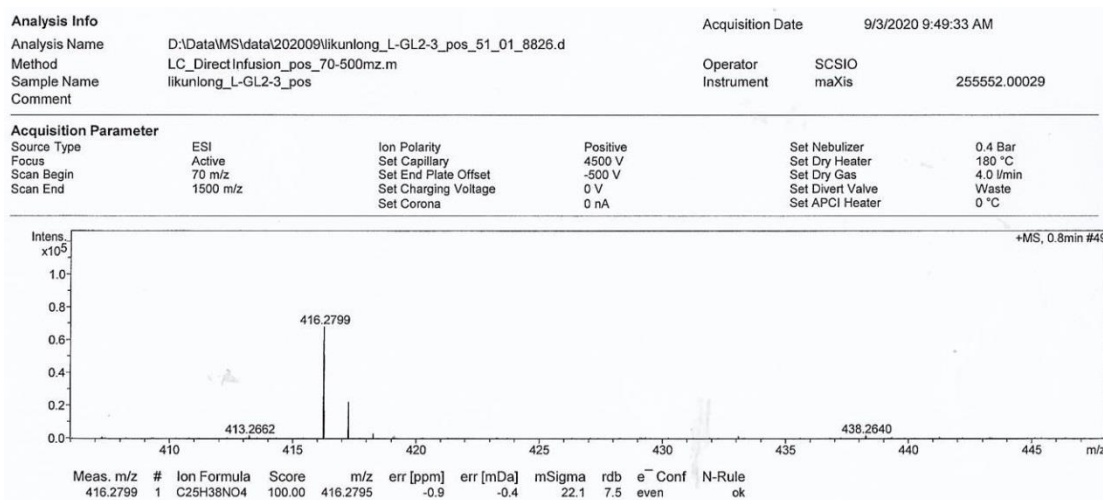

**Figure S52.** HRESIMS spectrum of piericidin (5)

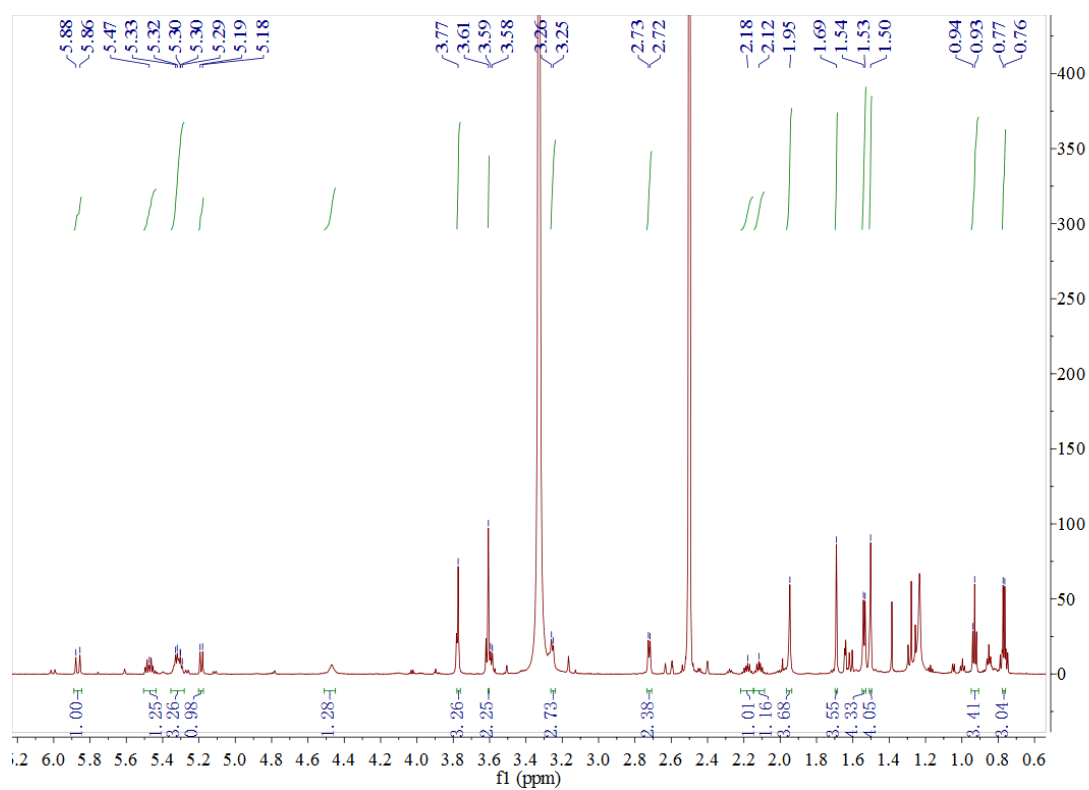

**Figure S53.** <sup>1</sup>H NMR spectrum of piericidin Q (6) (DMSO-*d*<sub>6</sub>, 700MHz)

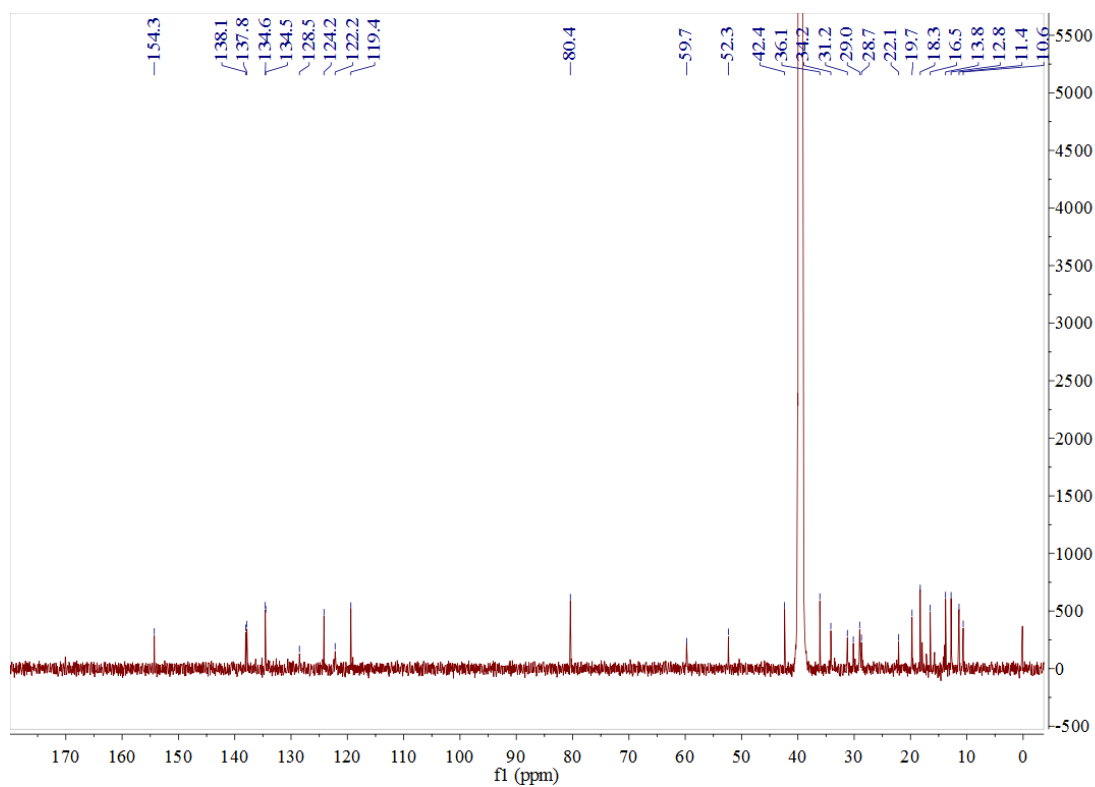

**Figure S54.**  $^{13}\text{C}$  NMR spectrum of piericidin Q (**6**) ( $\text{DMSO-}d_6$ , 175MHz)

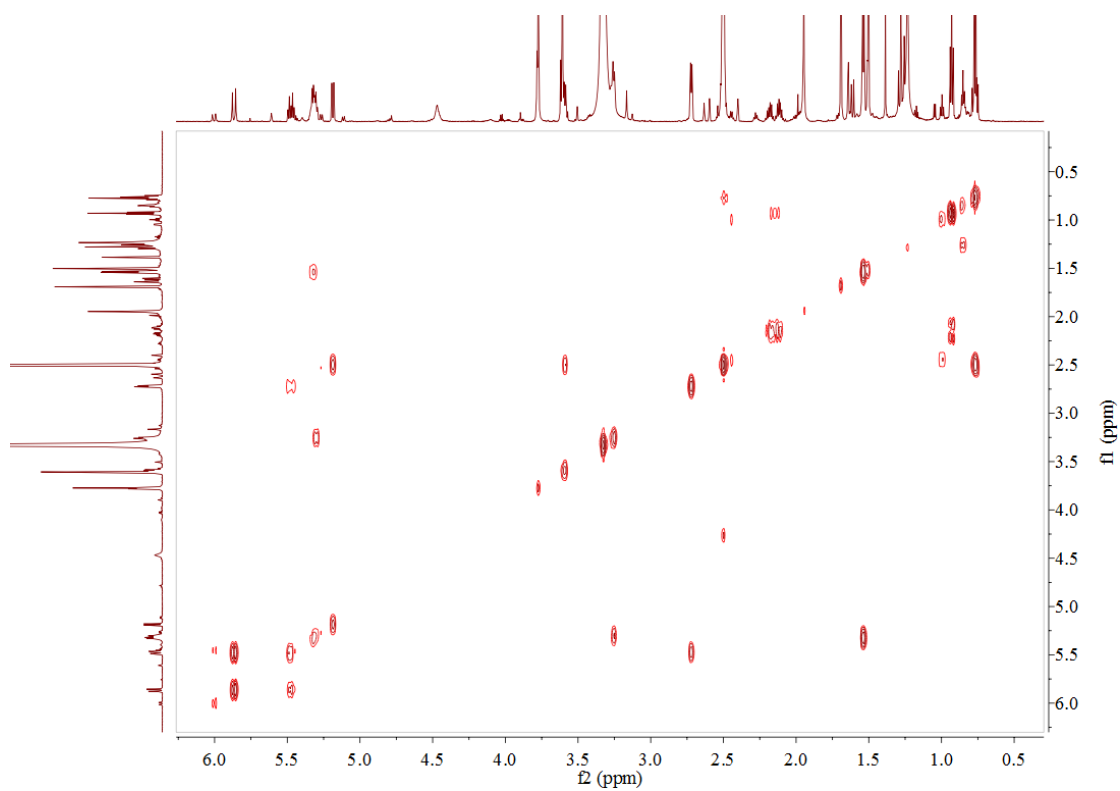

**Figure S55.**  $^1\text{H}$ - $^1\text{H}$  COSY spectrum of piericidin Q (**6**) ( $\text{DMSO-}d_6$ )

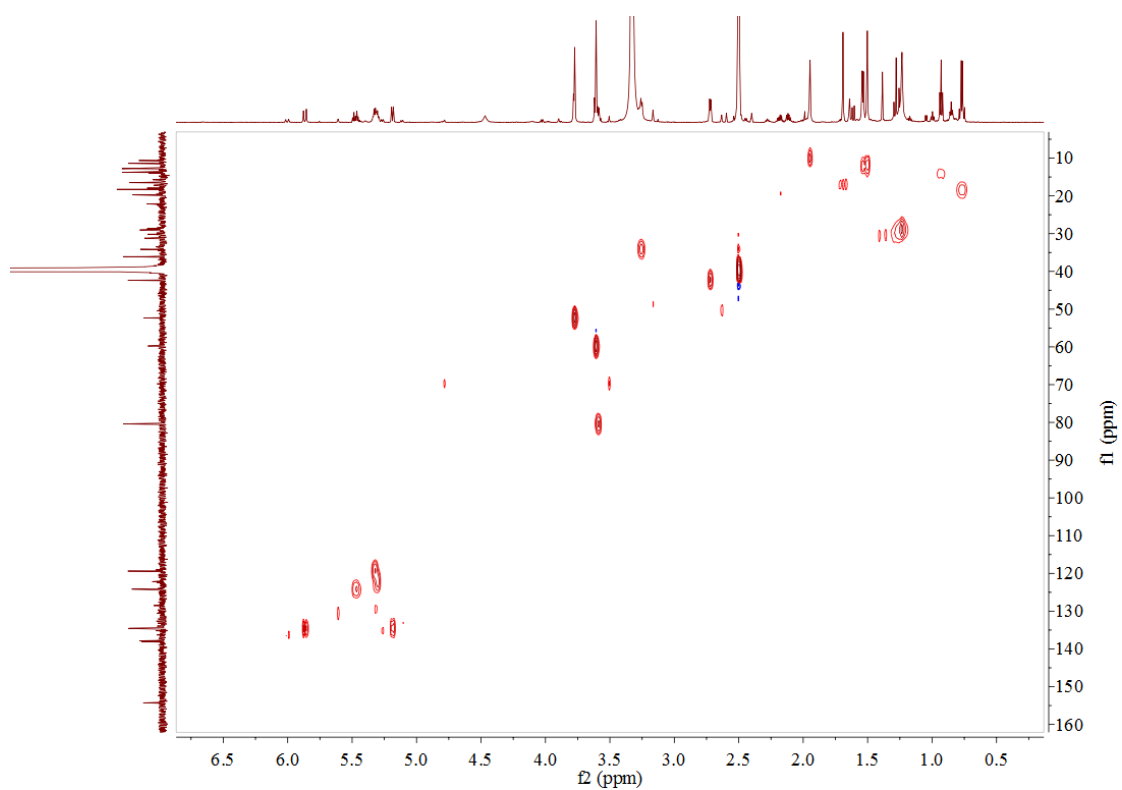

**Figure S56.** HSQC spectrum of piericidin Q (**6**) (DMSO- $d_6$ )

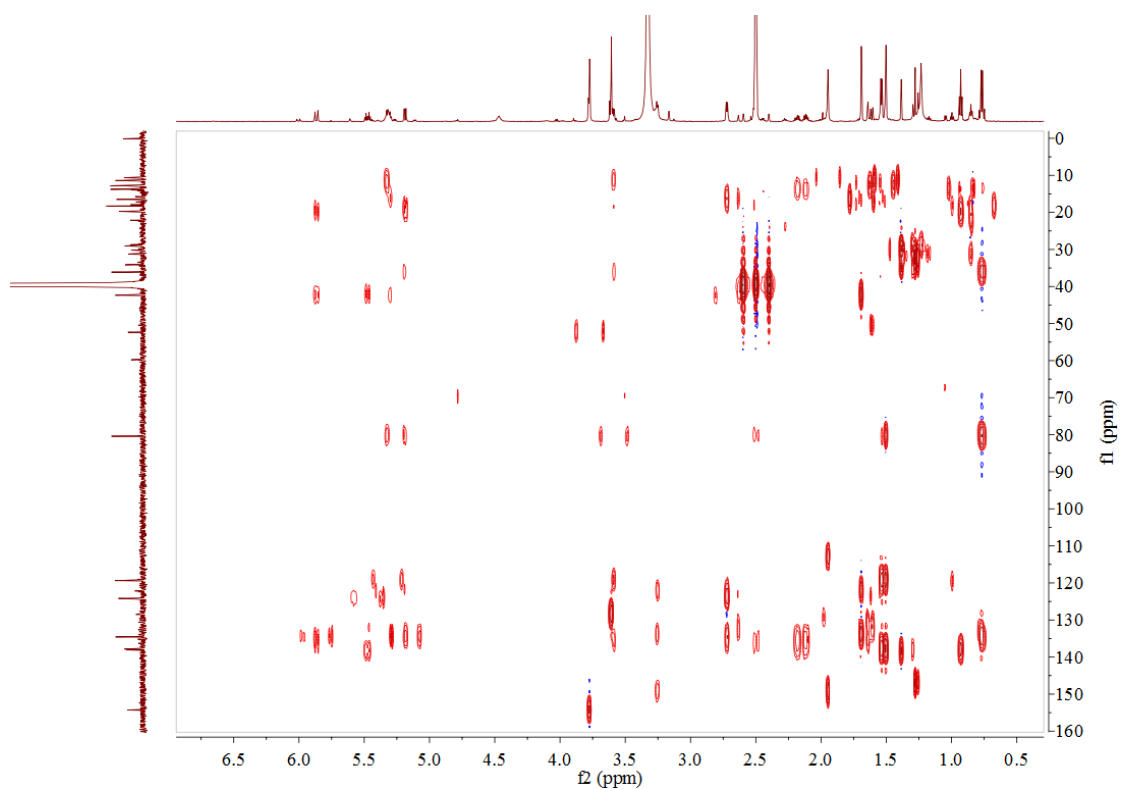

**Figure S57.** HMBC spectrum of piericidin Q (**6**) (DMSO- $d_6$ )

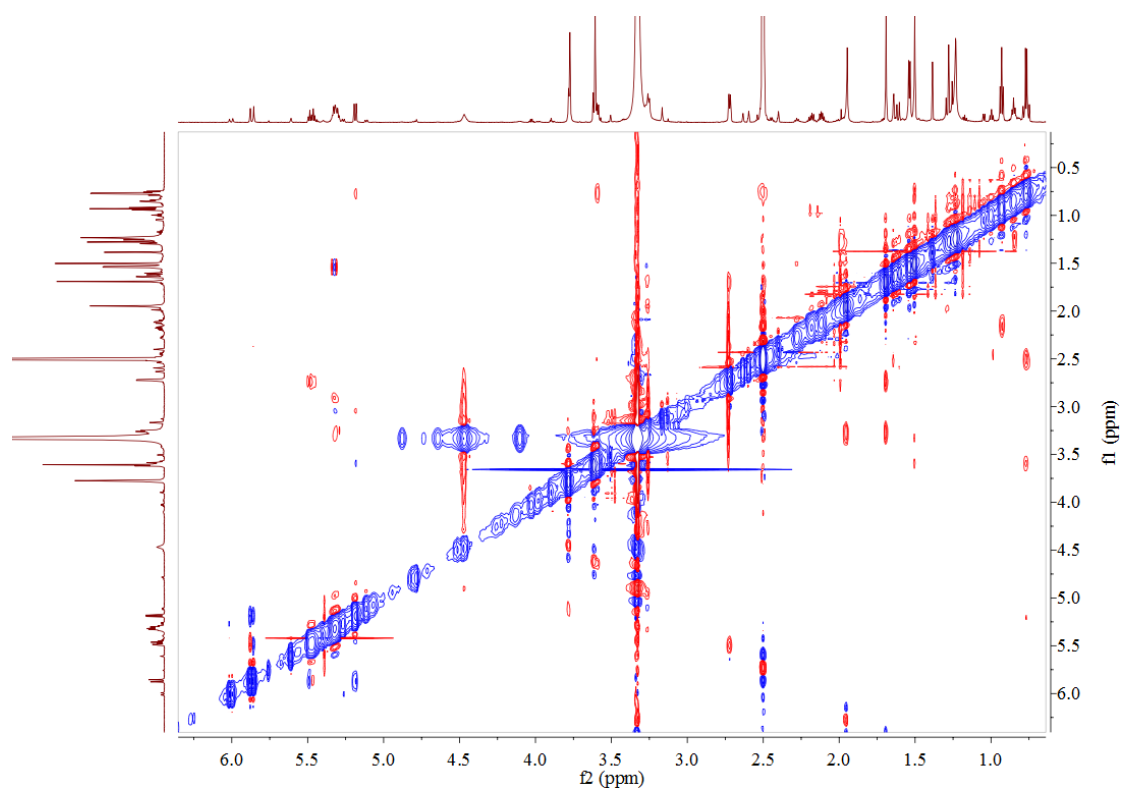

**Figure S58.** NOESY spectrum of piericidin Q (**6**) (DMSO- $d_6$ )

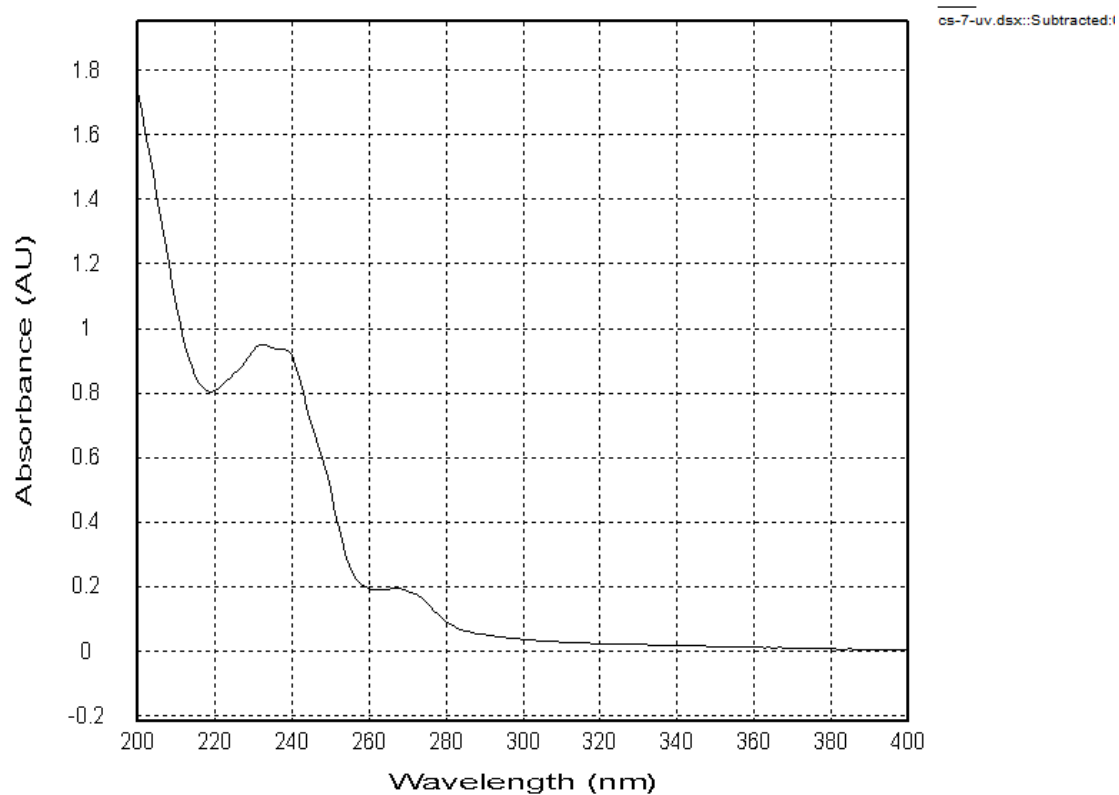

**Figure S59.** UV spectrum of piericidin Q (**6**)

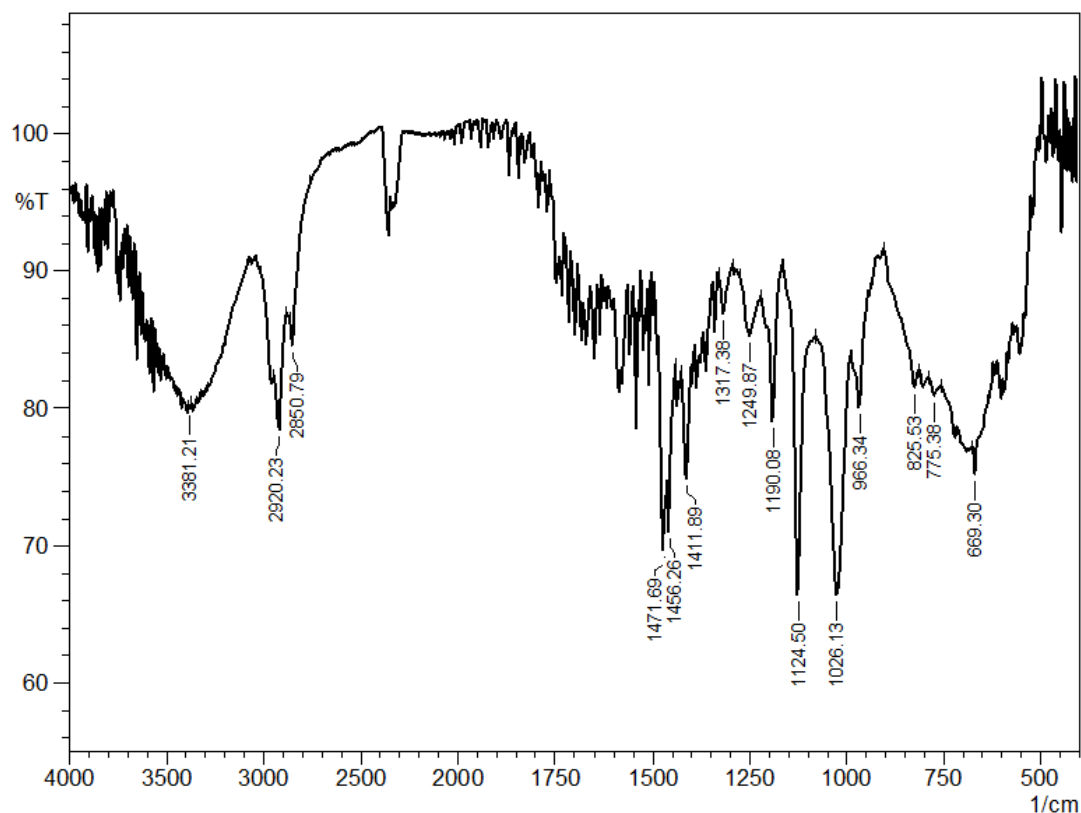

**Figure S60.** IR spectrum of piericidin Q (6)

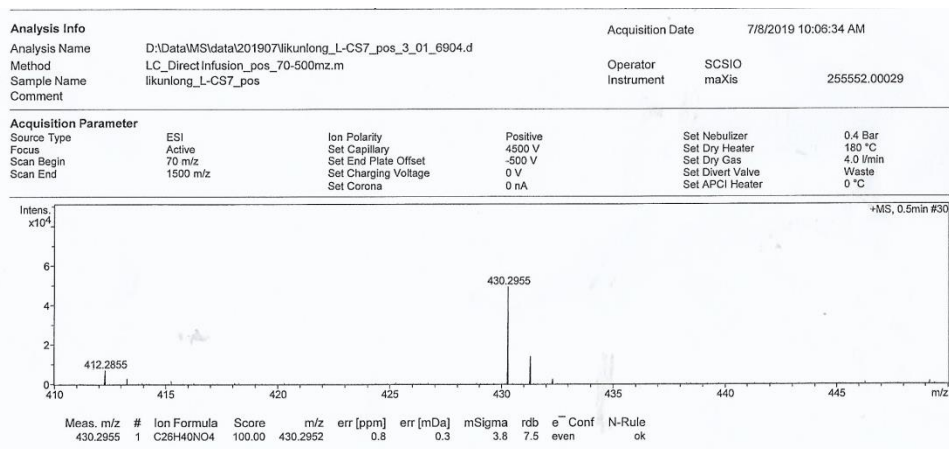

**Figure S61.** HRESIMS spectrum of piericidin Q (6)



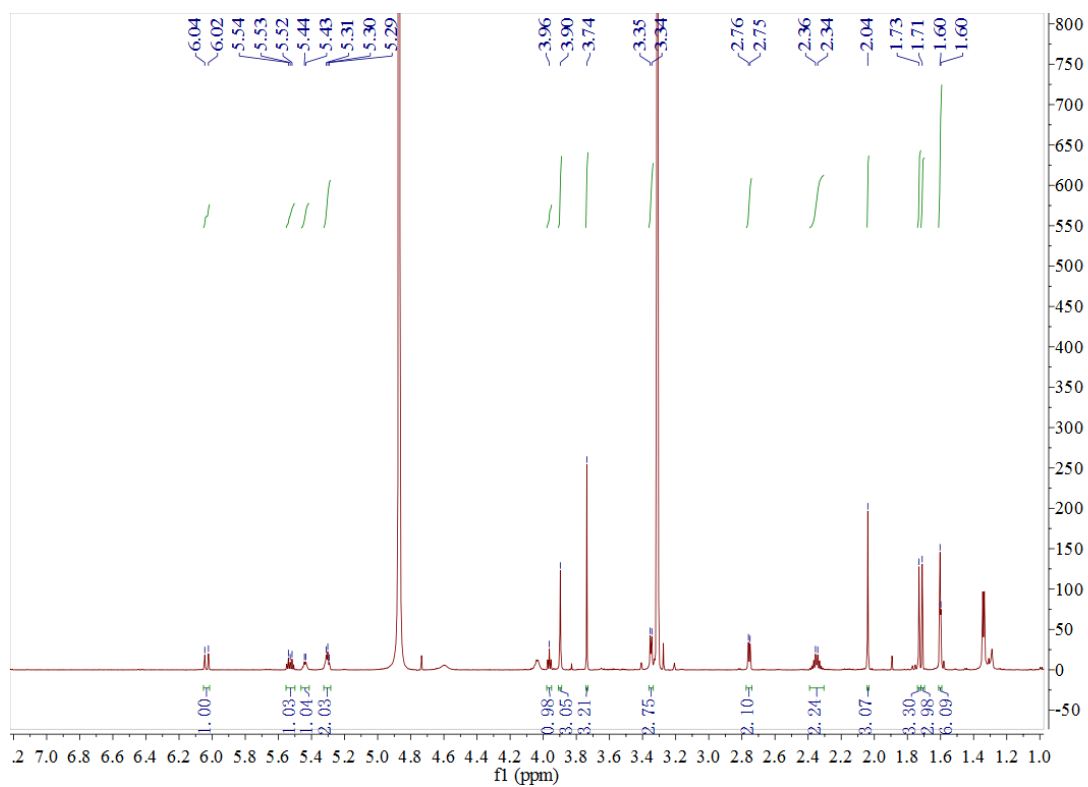

**Figure S62.** <sup>1</sup>H NMR spectrum of piericidin R (**7**) (CD<sub>3</sub>OD, 700MHz)

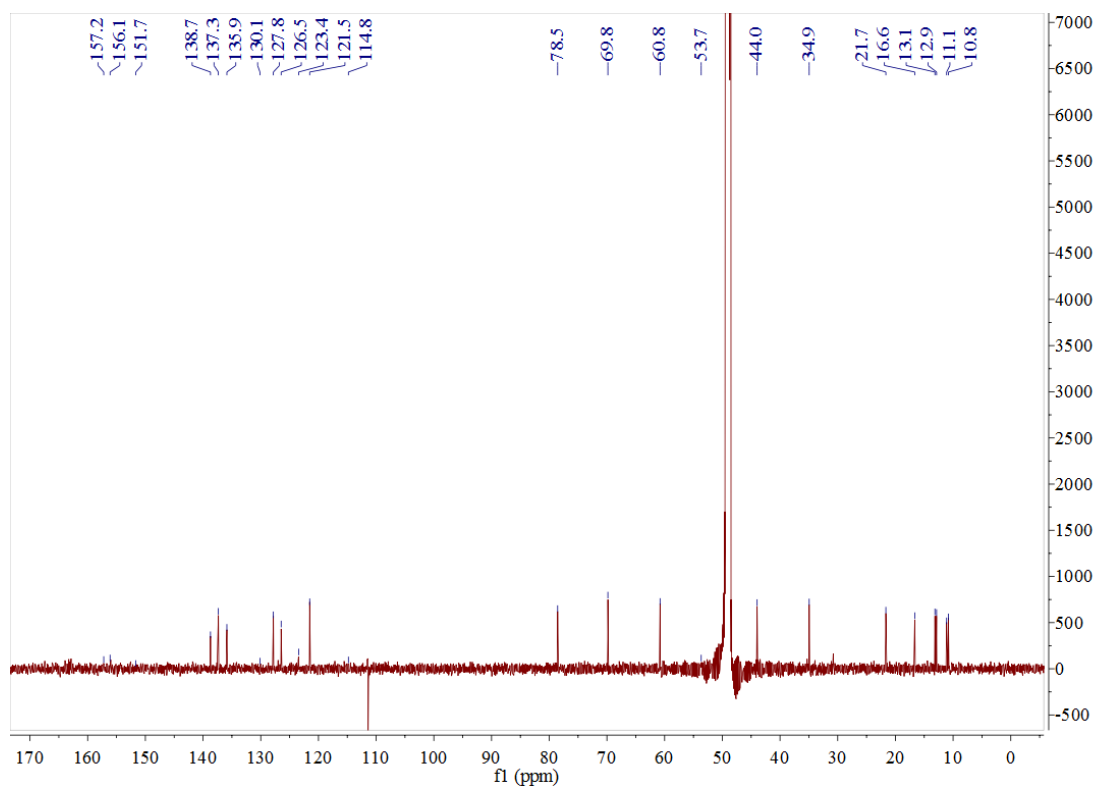

**Figure S63.** <sup>13</sup>C NMR spectrum of piericidin R (**7**) (CD<sub>3</sub>OD, 175MHz)

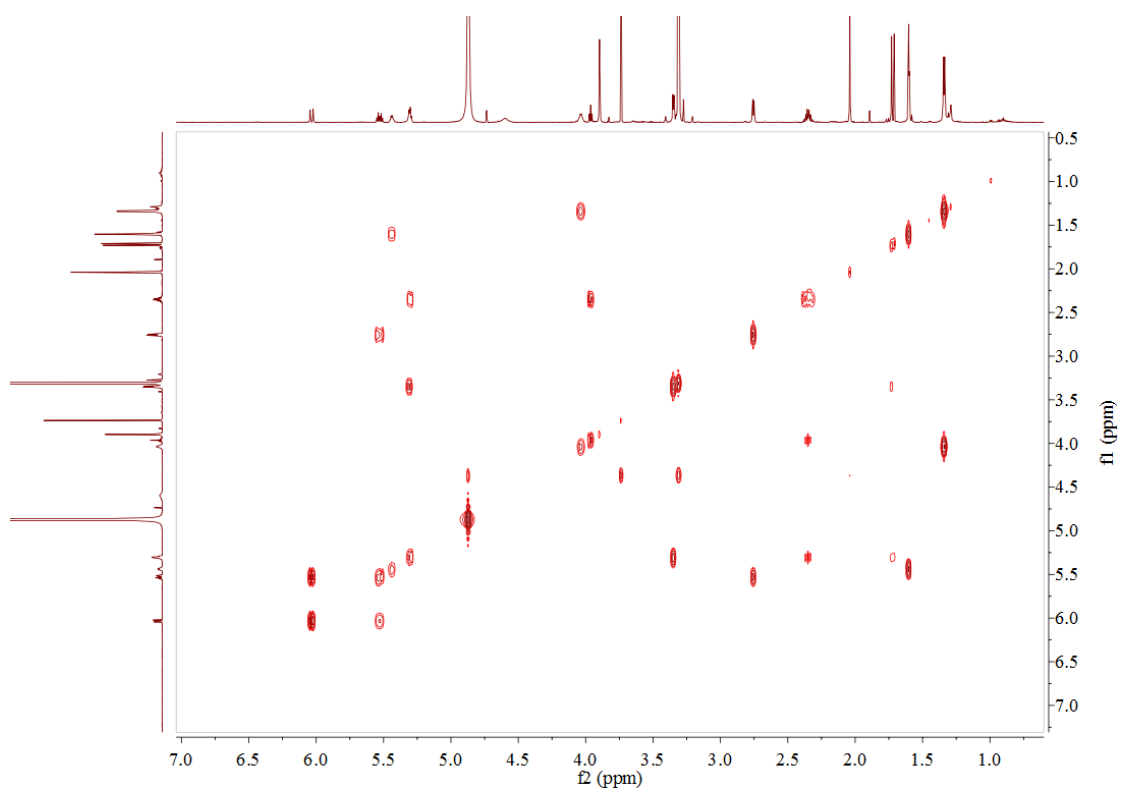

**Figure S64.**  $^1\text{H}$ - $^1\text{H}$  COSY spectrum of piericidin R (**7**) ( $\text{CD}_3\text{OD}$ )

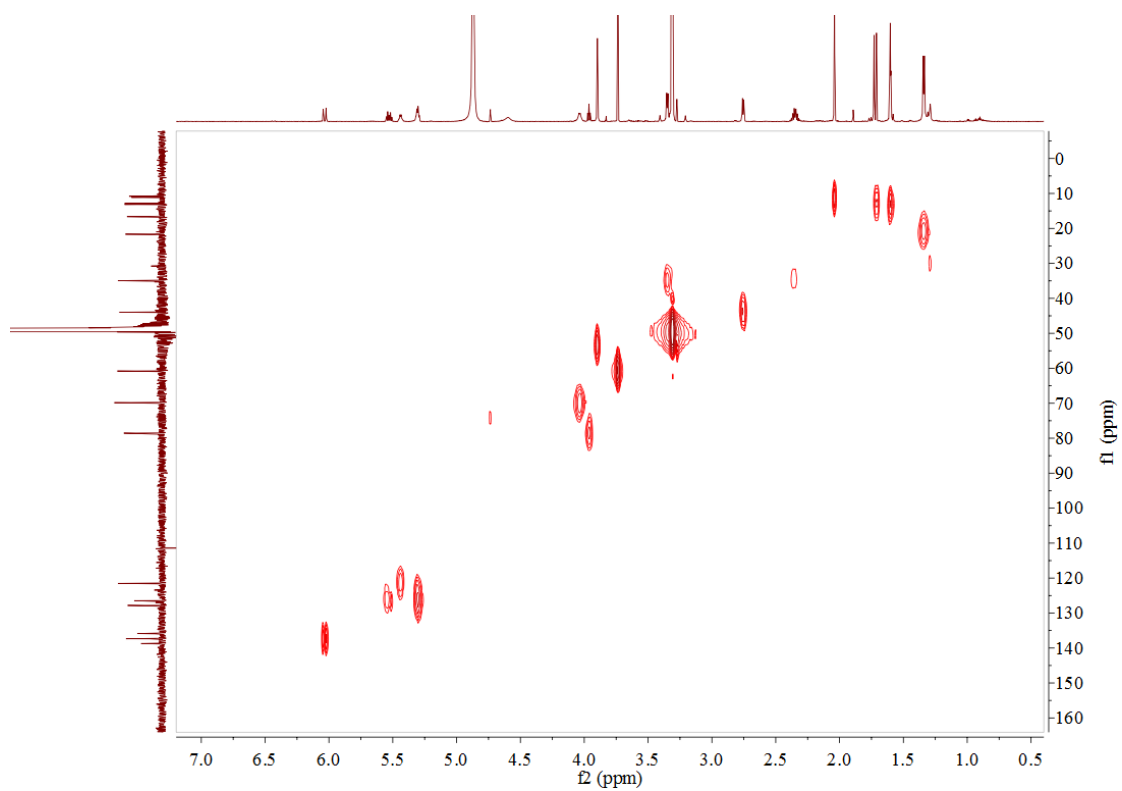

**Figure S65.** HSQC spectrum of piericidin R (**7**) ( $\text{CD}_3\text{OD}$ )

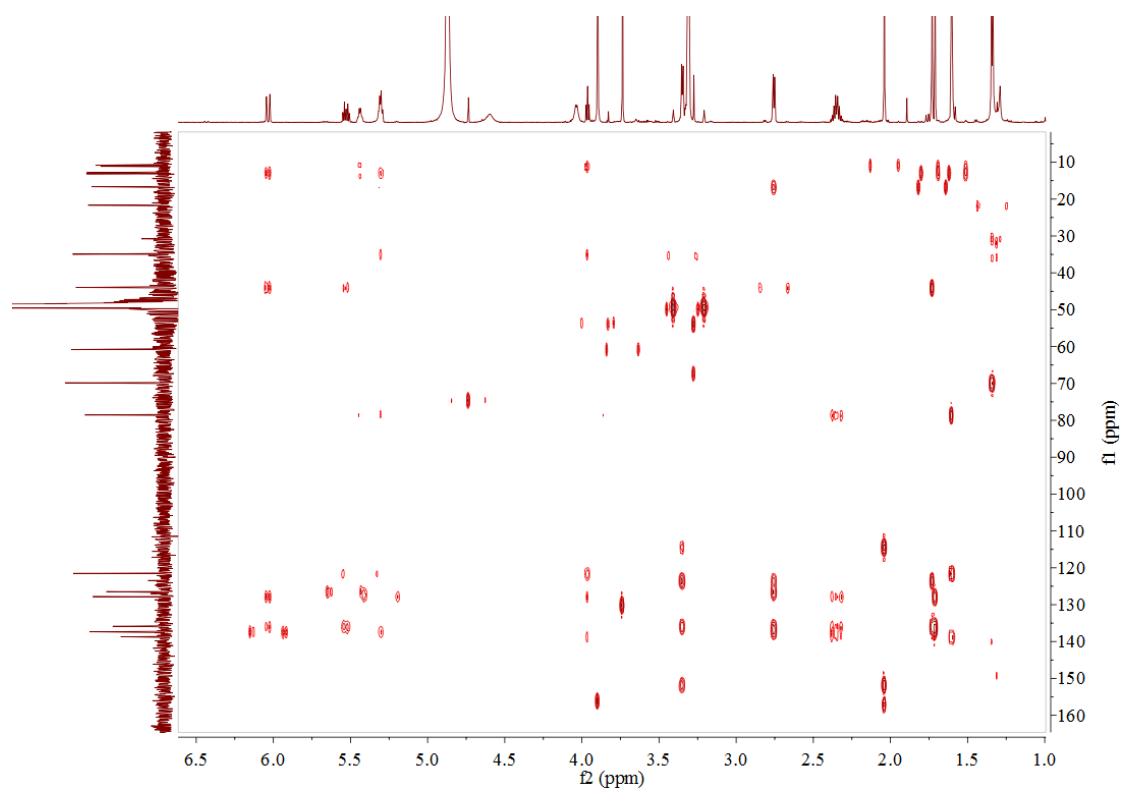

**Figure S66.** HMBC spectrum of piericidin R (**7**) (CD<sub>3</sub>OD)

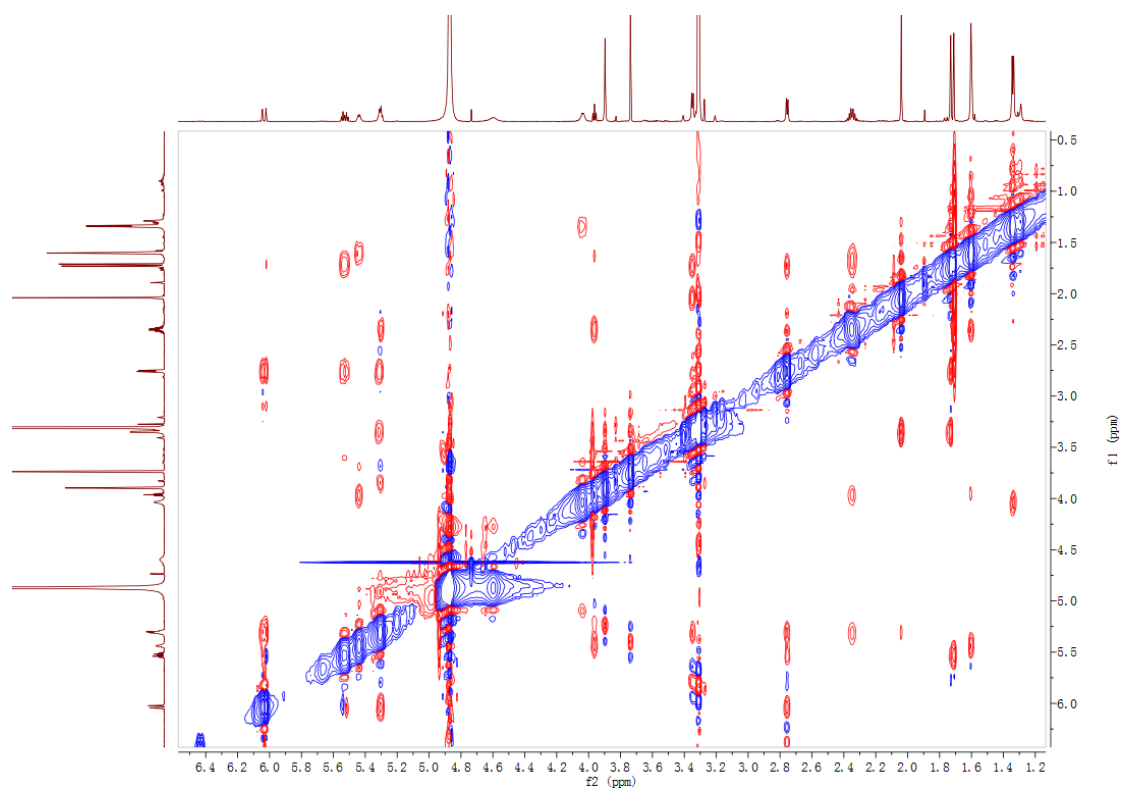

**Figure S67.** NOESY spectrum of piericidin R (**7**) (CD<sub>3</sub>OD)

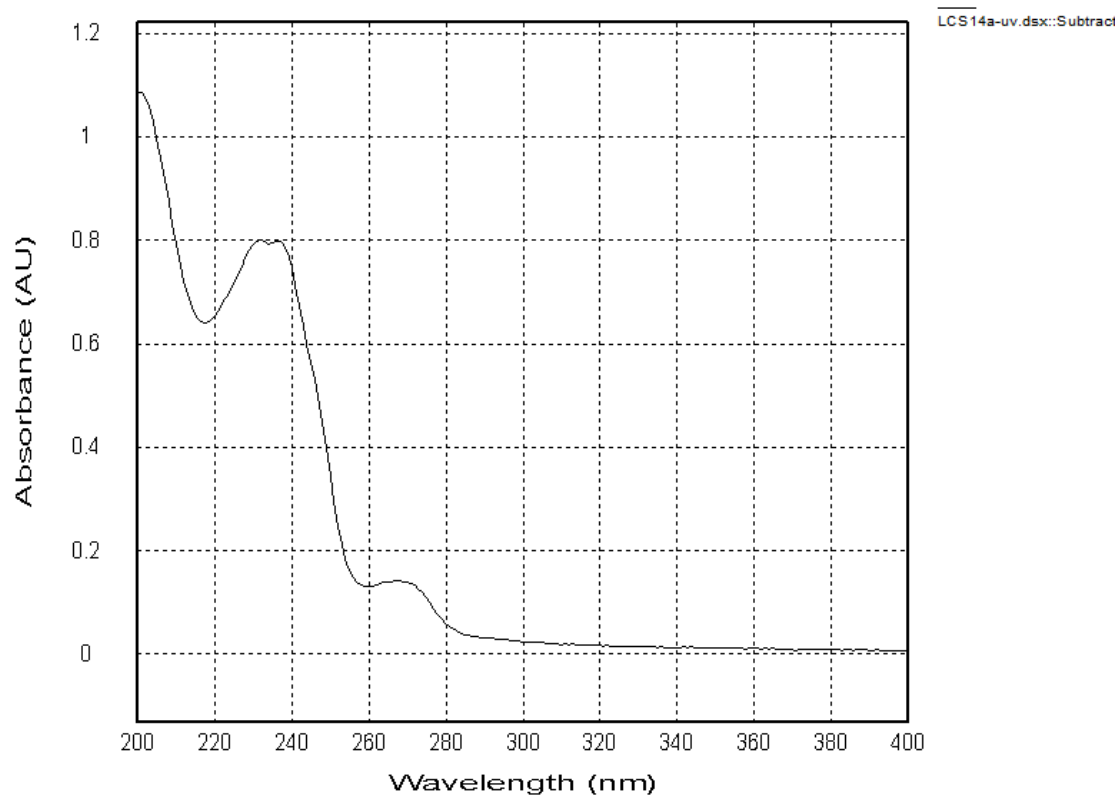

**Figure S68.** UV spectrum of piericidin R (7)

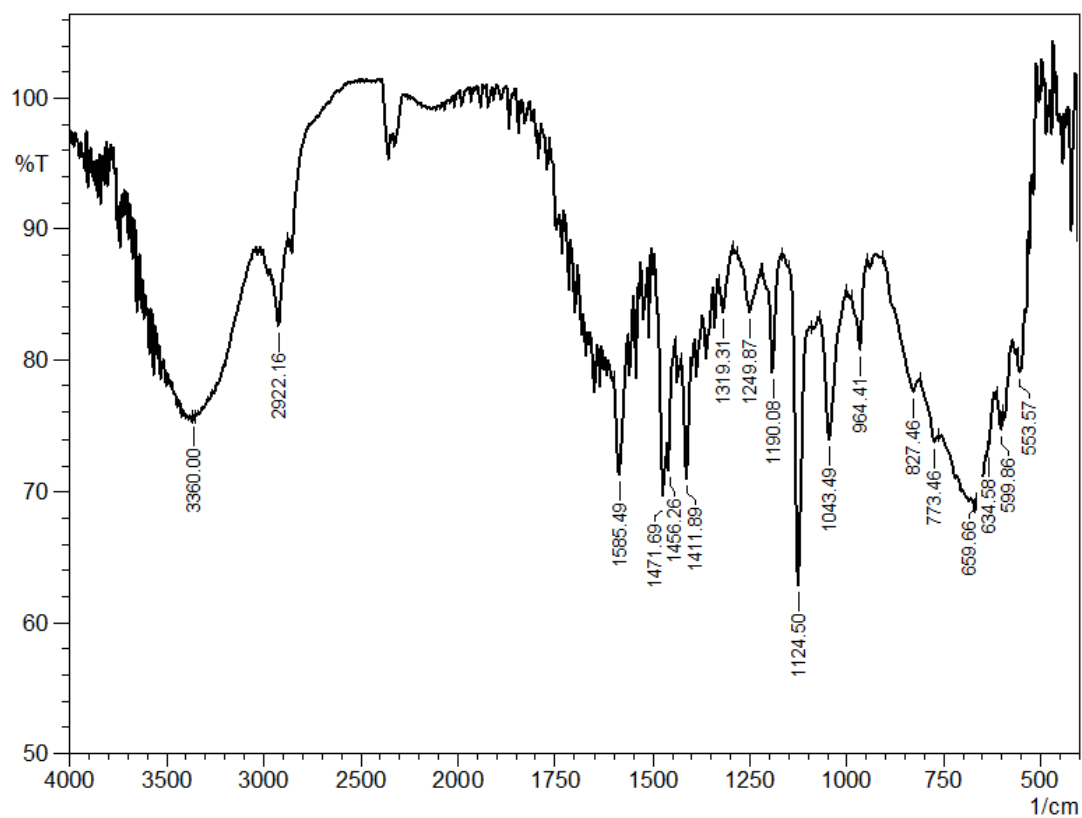

**Figure S69.** IR spectrum of piericidin R (7)

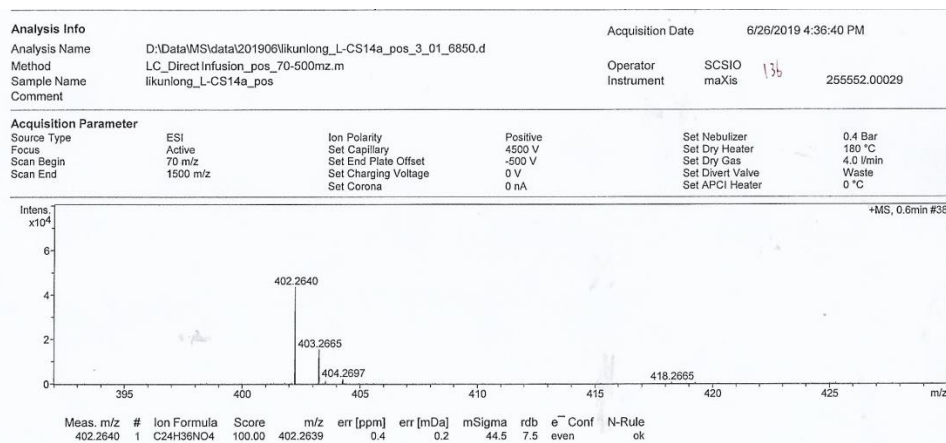

**Figure S70.** HRESIMS spectrum of pericidin R (**7**)

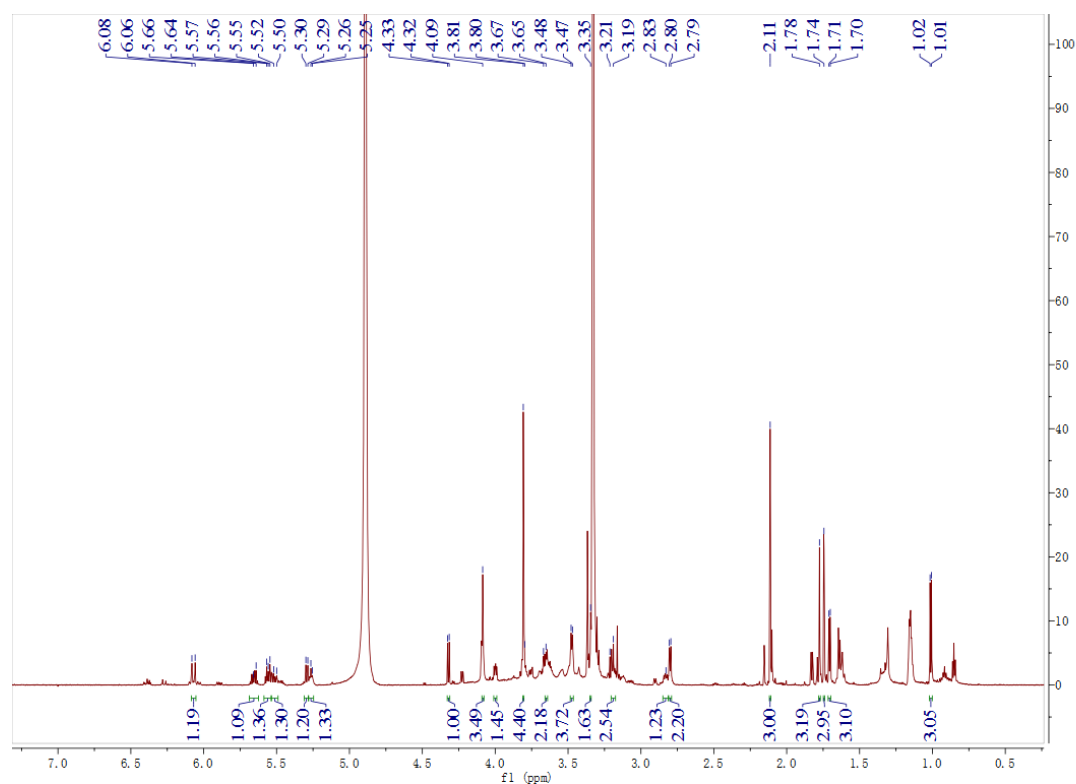

**Figure S71.** <sup>1</sup>H NMR spectrum of compound **8** (CD<sub>3</sub>OD, 700MHz)

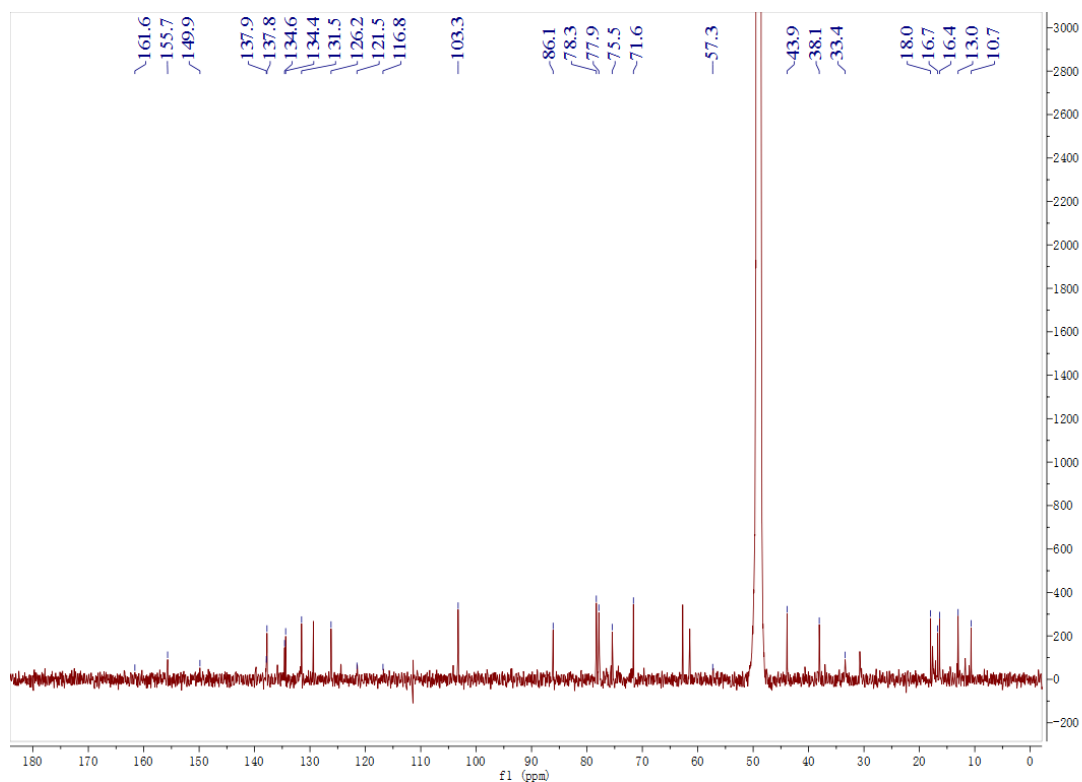

**Figure S72.**  $^{13}\text{C}$  NMR spectrum of compound **8** ( $\text{CD}_3\text{OD}$ , 175MHz)

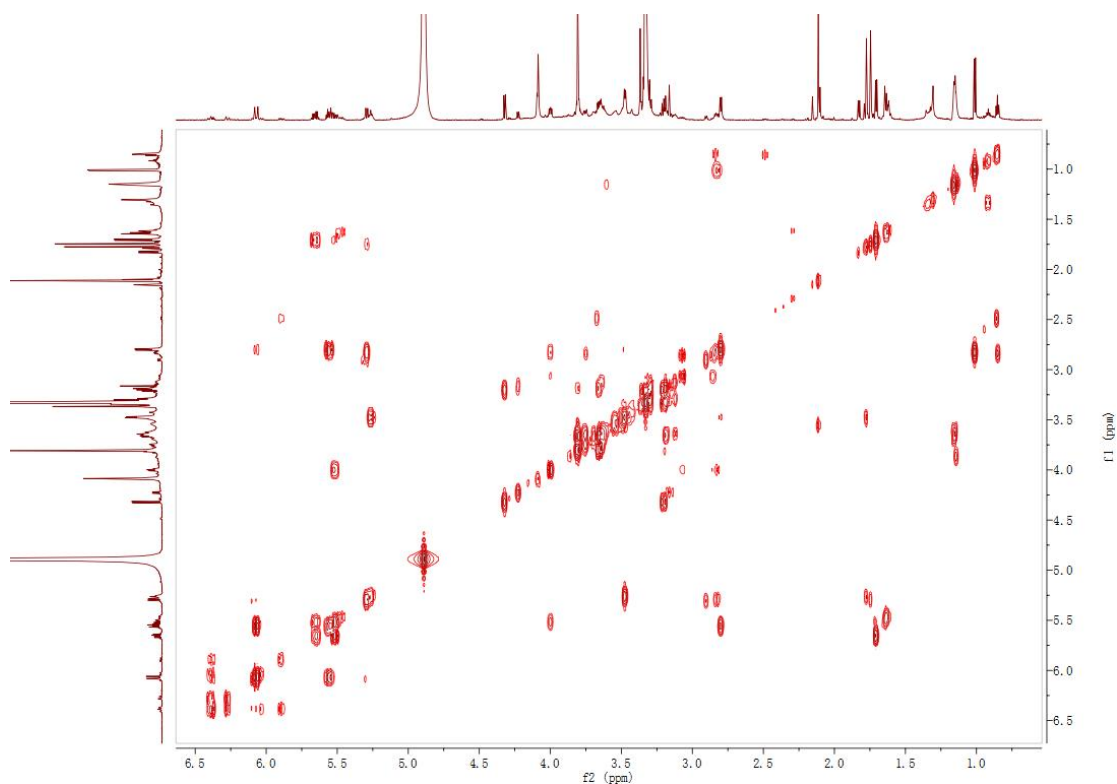

**Figure S73.**  $^1\text{H}$ - $^1\text{H}$  COSY spectrum of compound **8** ( $\text{CD}_3\text{OD}$ )

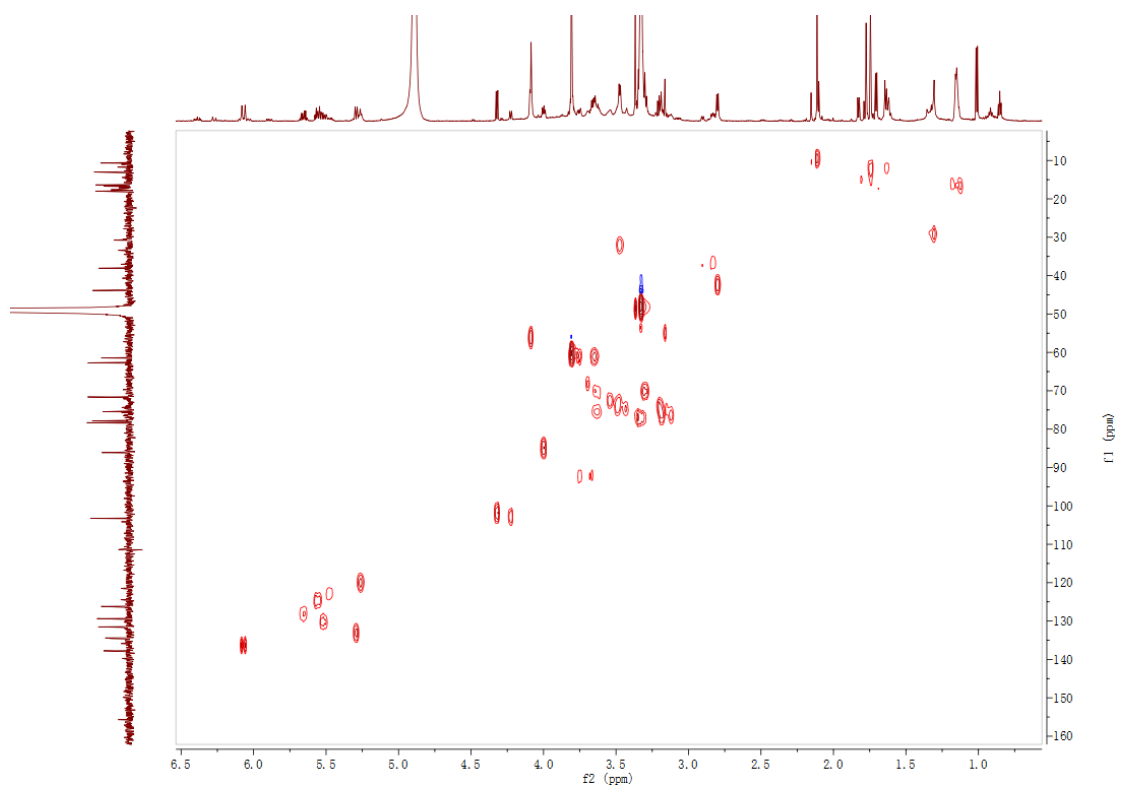

**Figure S74.** HSQC spectrum of compound **8** (CD<sub>3</sub>OD)

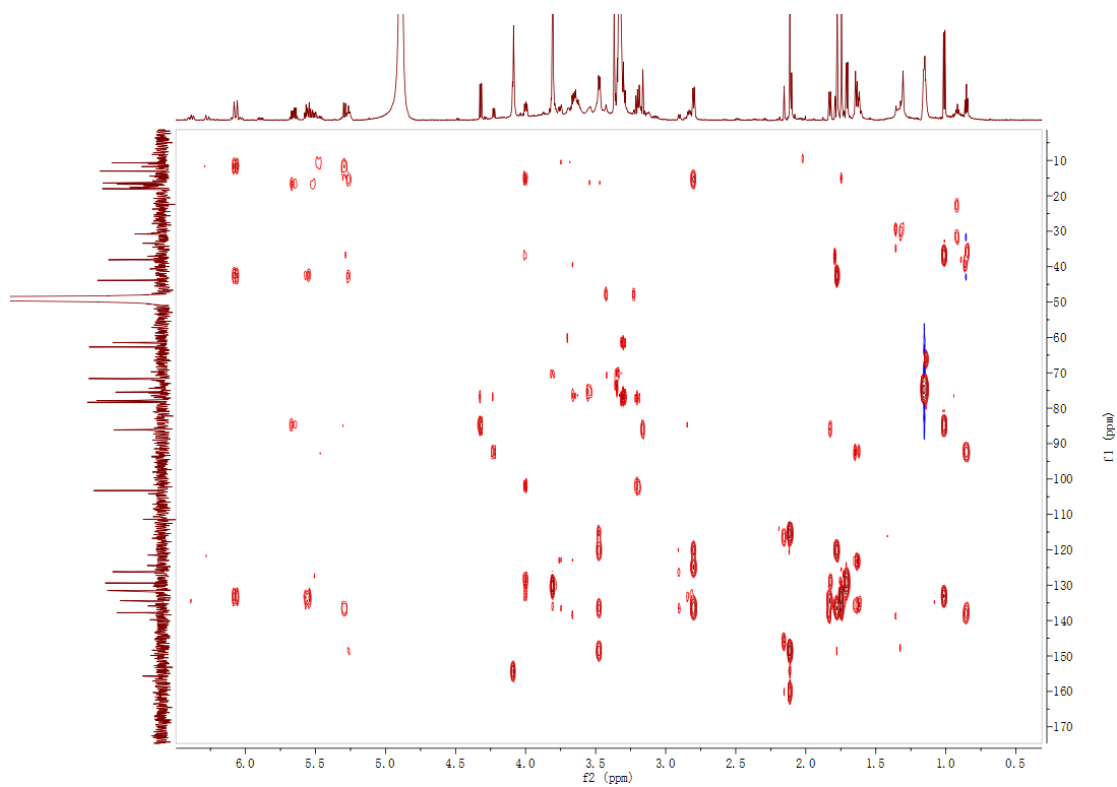

**Figure S75** HMBC spectrum of compound **8** (CD<sub>3</sub>OD)

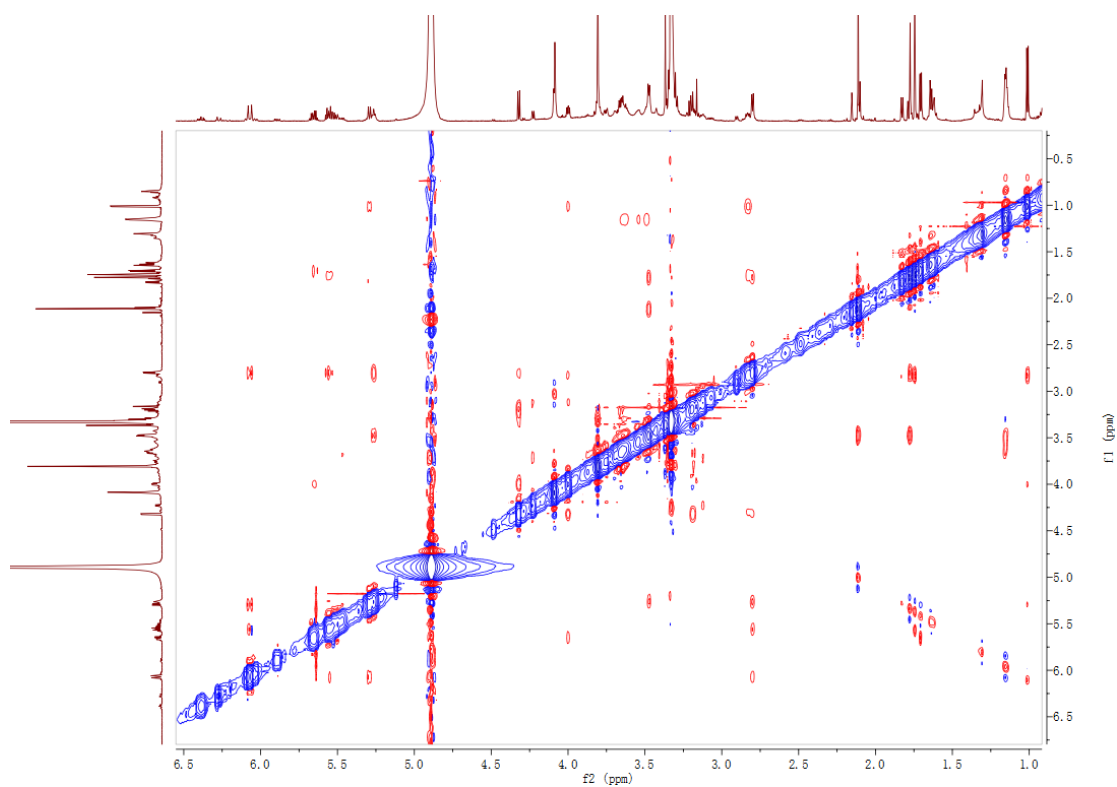

**Figure S76.** NOESY spectrum of compound **8** (CD<sub>3</sub>OD)

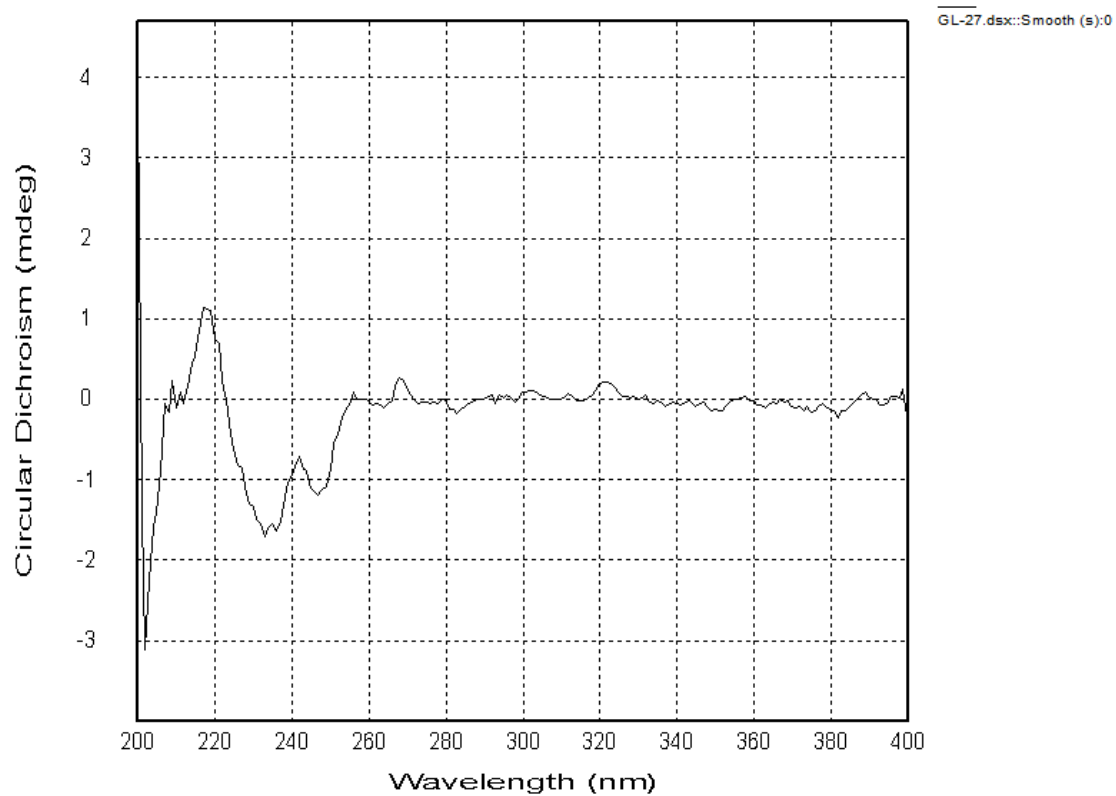

**Figure S77.** UV spectrum of compound **8**



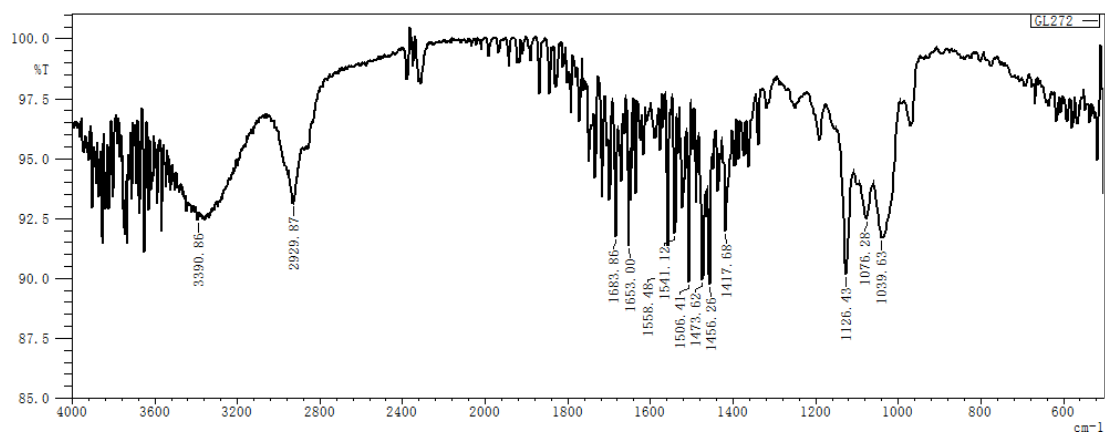

**Figure S78.** IR spectrum of compound **8**

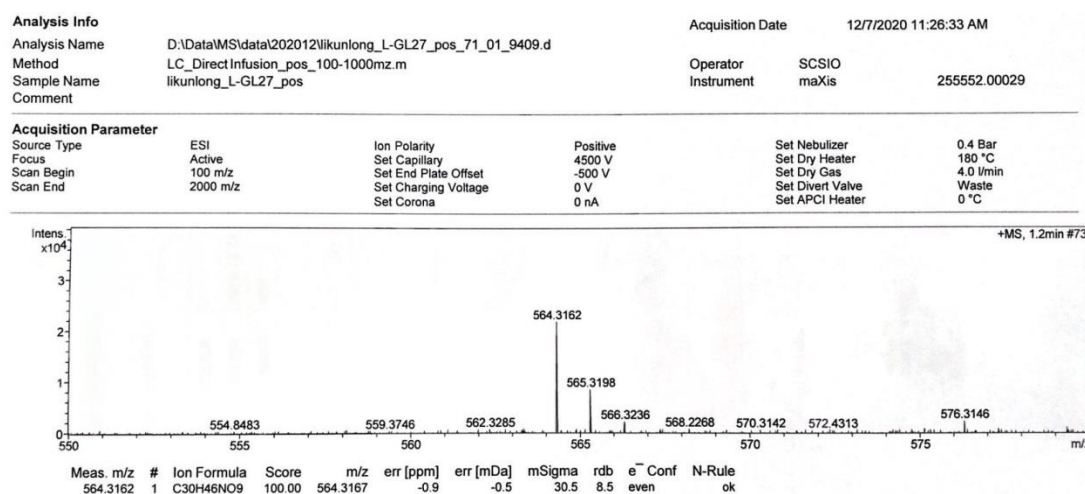

**Figure S79.** HRESIMS spectrum of compound **8**

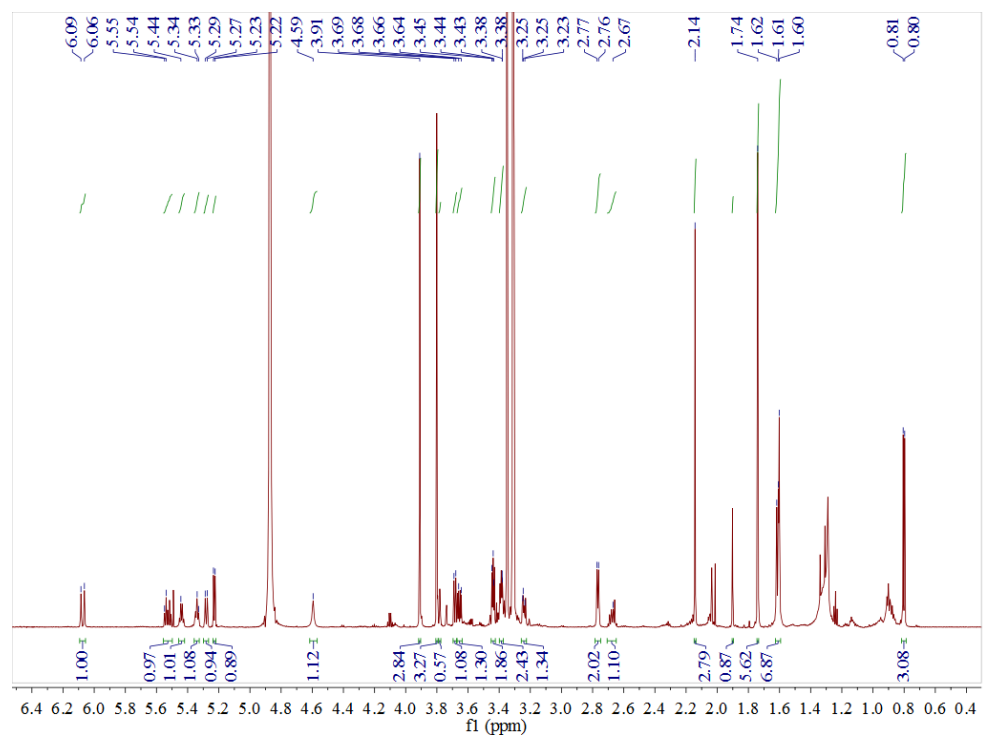

**Figure S80.**  $^1\text{H}$  NMR spectrum of compound **9** ( $\text{CD}_3\text{OD}$ , 700MHz)

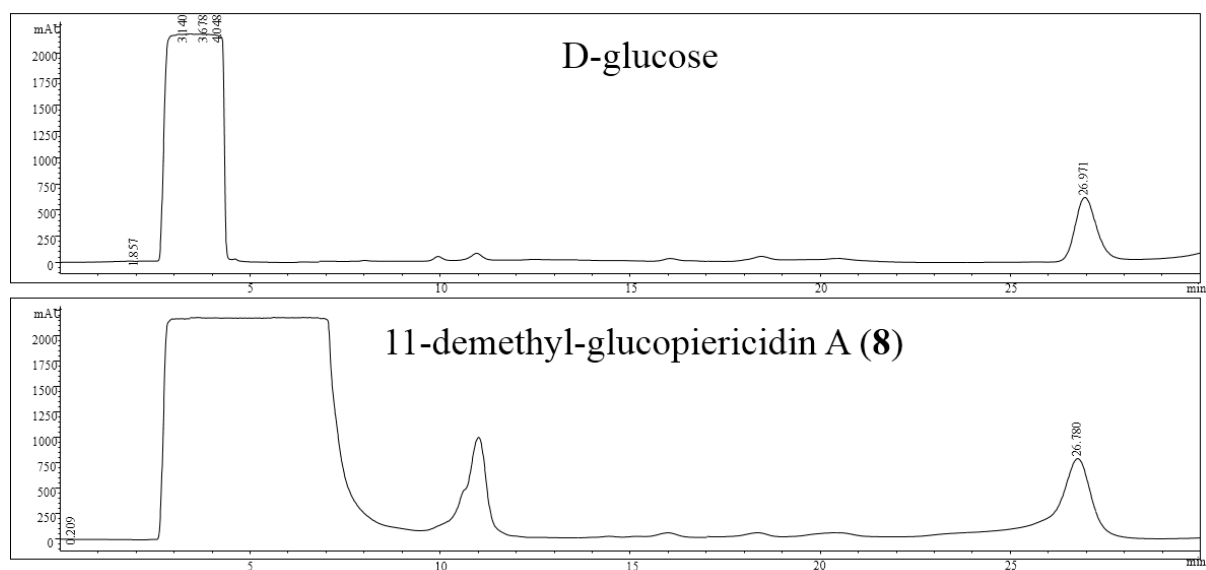

**Figure S81.** The HPLC results for D-glucose and **8** by acidic hydrolysis

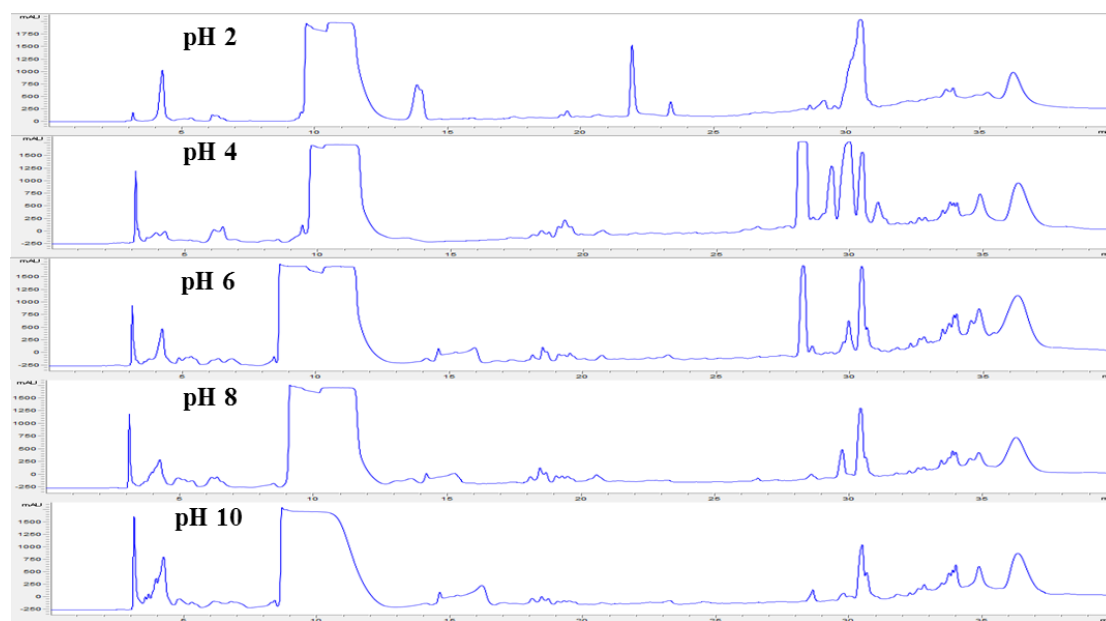

**Figure S82.** The HPLC analysis of crude extract in different external pH.

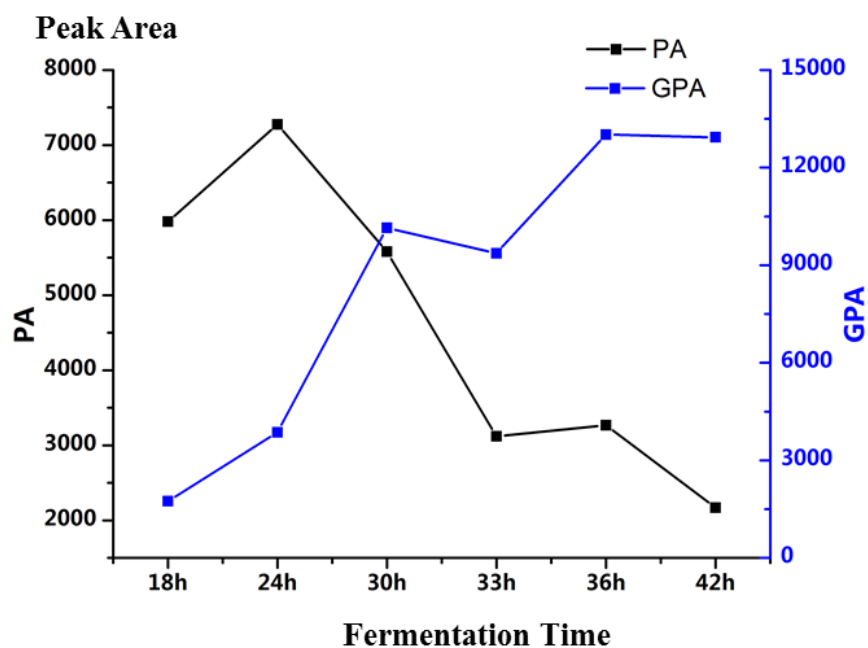

**Figure S83.** The content analysis of PA and GPA in different fermentation time.

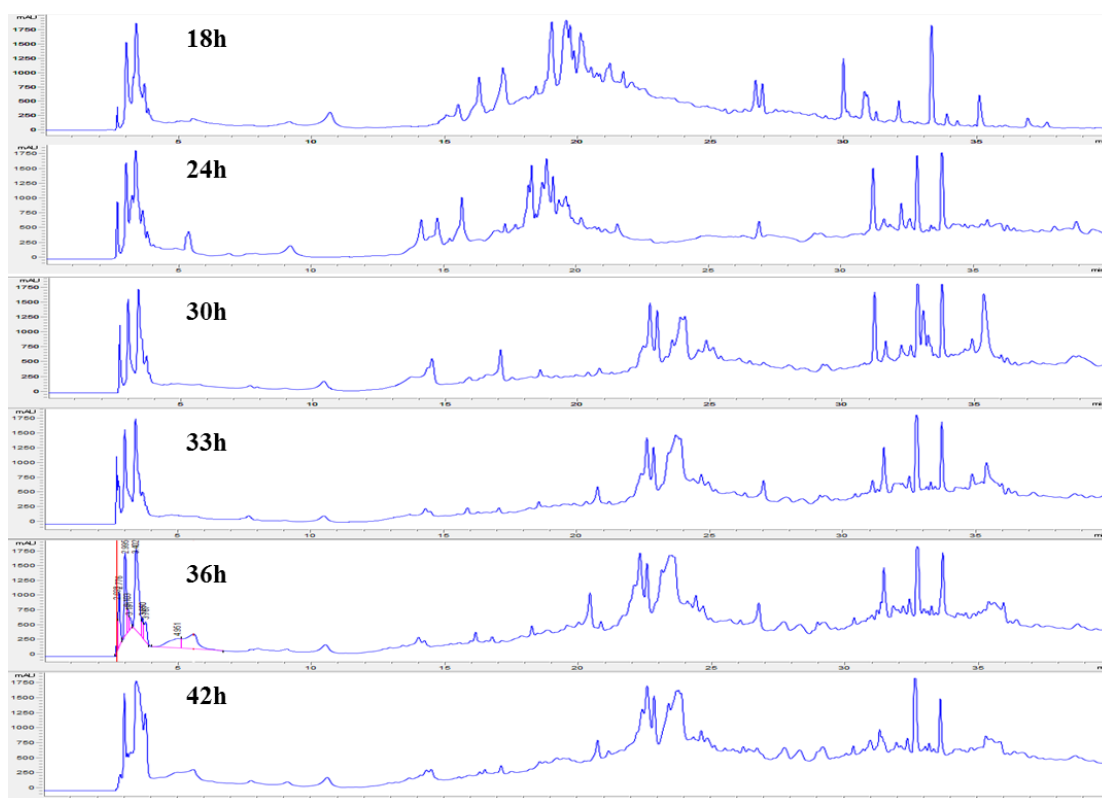

**Figure S84.** The HPLC analysis of crude extract in different fermentation time.
